# Supplementary material for: ChatGPT identifies gender disparities in scientific peer review
Source: eLife. 2023 Nov 3;12:RP90230. doi: 10.7554/eLife.90230 (PMC10624422; doi:10.7554/eLife.90230)
Supplement: Source data 1. [file elife-90230-data1.xlsx]

## Sheet: Data
	ChatGPT Query (used in ChatGPT version Feb 13 2023):
																											Second time								First time								Average of run 1 and 2
							Affiliation last author															Review reports					R1		R2		R3		R4		R1		R2		R3		R4		R1		R2		R3		R4
Paper #	URL	-		Date submitted	Date accepted	Days under review	US/Can	Asia	Europe	Aus/NZ	Country	Univ ranking QS2023	First author	Gender	Last Author	Gender	Title	Abstract		Subfield	Review found	R1	R2	R3	R4		Sentiment	Politeness	Sentiment	Politeness	Sentiment	Politeness	Sentiment	Politeness	Sentiment	Politeness	Sentiment	Politeness	Sentiment	Politeness	Sentiment	Politeness	Sentiment	Politeness	Sentiment	Politeness	Sentiment	Politeness	Sentiment
1	https://www.nature.com/articles/s41467-023-36087-x			2022-05-16	2023-01-16	245	x				U	81.8	Marc P. Forrest	M	Peter Penzes	M	Rescue of neuropsychiatric phenotypes in a mouse model of 16p11.2 duplication syndrome by genetic correction of an epilepsy network hub	Neuropsychiatric disorders (NPDs) are frequently co-morbid with epilepsy, but the biological basis of shared risk remains poorly understood. The 16p11.2 duplication is a copy number variant that confers risk for diverse NPDs including autism spectrum disorder, schizophrenia, intellectual disability and epilepsy. We used a mouse model of the 16p11.2 duplication (16p11.2dup/+) to uncover molecular …		5	x	This is an exciting piece of work by Forrest et al, corresponding author Penzes. Using the 16p11.2 duplication mouse model, the authors investigate the proteome of the synaptic membrane in neocortex and identify a network relevant to epilepsy, where the PRRT2 protein is a hub. They also identify cellular and circuitry based dysfunction, and produce a robust seizure phenotype in response to a chem…	Human chromosome 16p11.2 is one of the recurrent CNV loci, including deletion and duplication in ASD, SZ, or ID individuals. The authors conducted quantitative proteomics analysis followed by bioinformatics approaches to identify a driver gene or dysregulated network in the brain of the 16p11.2 duplication mouse model. They found that an epilepsy-associated protein subnetwork was especially dysre…	Here the authors describe a mouse model of CNV previously associated with various neurological disorders, the microduplication 16p11.2. Using this mouse model, they performed unbiased proteomic assays on membrane proteins in brain and identified a large amount of proteomic dysregulation, including networks involved in epilepsy, which were also associated with hypersynchronous activity in neurons …	N/A		80	80	70	80	75	50			60	60	60	80	50	70			70	70	65	80	62.5	60
2	https://www.nature.com/articles/s41467-023-36616-8			2022-06-28	2023-02-09	226	x				U	58.2	Vinod Menon	M	Yen-Yu Ian Shih	M	Optogenetic stimulation of anterior insular cortex neurons in male rats reveals causal mechanisms underlying suppression of the default mode network by the salience network	The salience network (SN) and default mode network (DMN) play a crucial role in cognitive function. The SN, anchored in the anterior insular cortex (AI), has been hypothesized to modulate DMN activity during stimulus-driven cognition. However, the causal neural mechanisms underlying changes in DMN activity and its functional connectivity with the SN are poorly understood. Here we combine feedforw…		2	x	This excellent study by Menon et al. demonstrates the power of optogenetic stimulation in combination with fMRI for interrogating the functional organization of the brain. The work is thorough and rigorous, incorporating both experimental and analytical controls. The manuscript could be published as it is, but I have a few requests that might enhance its value for future readers. 1) Please show s…	This study examined the effect of feedforward optogenetic stimulation of the anterior insular cortex (AI) on dynamic functional connectivity with key nodes of the salience network (SN) and default-mode network (DMN). A main finding was that stimulation of the AI was sufficient to suppress key nodes of the DMN. This is an important study that provide novel insight into causal mechanisms underlying…	The manuscript is of substantial interest, as it concerns causal manipulations triggering brain state changes related to the DMN. As such, it is not the first to use this approach, and previous work in this area (PNAS 115 (6) 1352-1357, SCI REP; 9: 2570. and others) should be mentioned and discussed in relation to the present findings. This above mentioned work concerns long range corticopetal pr…	N/A		80	80	30	80	50	80			90	70	40	90	50	70			85	75	35	85	50	75
3	https://www.nature.com/articles/s41467-023-36587-w			2022-08-08	2023-02-07	183			x		E	64.1	Li-Ju Hsu		Ole Kiehn	M	Deconstructing the modular organization and real-time dynamics of mammalian spinal locomotor networks	Locomotion empowers animals to move. Locomotor-initiating signals from the brain are funneled through descending neurons in the brainstem that act directly on spinal locomotor circuits. Little is known in mammals about which spinal circuits are targeted by the command and how this command is transformed into rhythmicity in the cord. Here we address these questions leveraging a mouse brainstem-spi…		1	x	The paper by Hsu, Bertho and Kiehn uses population Calcium imaging of the L3-L4 lumbar segment to describe the locomotor activity induced by bainstem stimulation. I find the results interesting and important. In particular, the identification of a very localized brainstem region that can evoke locomotion is very impressive and it will certainly prompt further studies aimed at identifying the neur…	General Comments: This manuscript describes an interesting and elegant description of the spatiotemporal organization of spinal modules involved in the transformation of tonic drive from descending regions of the brainstem into rhythmic activity in the spinal locomotor network. Overall, the work was received with enthusiasm, and it provides a roadmap for future work. Some weaknesses were identifi…	In this manuscript, Hsu et al describe their work outlining a descending locomotor command from a specific brain stem reticulospinal area, the CVL/LPGi, to the mid-lumbar spinal cord, where the tonic descending signal is converted to a rhythmic signal to produce locomotor-like activity. They are addressing an important question – one that will be of great interest to the community studying locomo…	N/A		90	80	80	90	80	50			80	80	80	90	75	90			85	80	80	90	77.5	70
4	https://www.nature.com/articles/s41467-023-36346-x			2020-09-15	2023-01-26	863	x				U		Yan Li		Gonzalo H. Otazu	M	Robust odor identification in novel olfactory environments in mice	Relevant odors signaling food, mates, or predators can be masked by unpredictable mixtures of less relevant background odors. Here, we developed a mouse behavioral paradigm to test the role played by the novelty of the background odors. During the task, mice identified target odors in previously learned background odors and were challenged by catch trials with novel background odors, a task simil…		2	x	In this manuscript Otazo and colleagues develop a new olfactory behavioral paradigm (background / foreground separation with new distractor backgrounds) and show that while WT mice readily learn and generalize, one mouse model of autism struggles. I find the paradigm relevant and well studied, developed and described and while the autism model is only a very small part of the paper I can see the …	The manuscript by Li and co-workers performs an innovative study of decoding the targeted stimulus from glomerular activity in a go-no go task similar to the visual CAPTCHA used to distinguish humans from computers. In the olfactory CAPTCHA go-no go task small concentrations of target odorants (go vs. no-go) are presented in the presence of higher concentrations of known and novel background odor…	Detecting a relevant odor (figure) in the background of less relevant odors (ground) is a critical task that animals need to solve in a natural environment. Here Li et al. investigated if mice can solve this figure-ground separation problem using a go/no-go task. The major finding is that the mice can correctly perform the task even when the identity of a background odor was switched between a tr…	N/A		-50	20	30	70	-30	40			5	20	60	70	-30	20			-22.5	20	45	70	-30	30
6	https://www.nature.com/articles/s41467-023-36448-6			2021-09-11	2023-02-01	508		x			A		Lulu Yao		Nenggui Xu	M	Electroacupuncture improves swallowing function in a post-stroke dysphagia mouse model by activating the motor cortex inputs to the nucleus tractus solitarii through the parabrachial nuclei	As a traditional medical therapy, stimulation at the Lianquan (CV23) acupoint, located at the depression superior to the hyoid bone, has been shown to be beneficial in dysphagia. However, little is known about the neurological mechanism by which this peripheral stimulation approach treats for dysphagia. Here, we first identified a cluster of excitatory neurons in layer 5 (L5) of the primary motor…		5	x	The authors used a combination of nerve tracing and optogenetic methods in mice to identify the neural circuit activated during acupuncture therapy at pharyngeal acupoint CV23, which is located at the depression superior to the hyoid bone. This superficial electrical stimulation method is widely used in China to treat post-stroke dysphagia (PSD); however, the underlying mechanisms are largely unk…	This is a very comprehensive and potentially important paper on the neurophysiology of swallowing. It represents a significant amount of work. I am not qualified to review the efficacy of all the viral vector based interventions so I will leave to other reviewers to determine their validity. I will focus on the evaluation of swallowing function and the interpretation of the results regarding elec…	In this study, the authors tried to reveal a neuroanatomical basis for electroacupuncture (EA) to promote swallowing in mice with post-stroke dysphagia (PSD). Using retrograde labeling, they first revealed a descending neural circuit from M1, to parabrachial nuclei (PBN), then to the nucleus of solitary tract (NTS), and finally to the mylohyoid muscle. They then found that EA at the CV23 acupoint…	N/A		50	80	60	70	20	80			60	70	30	70	10	50			55	75	45	70	15	65
7	https://www.nature.com/articles/s41467-023-36321-6			2022-05-06	2023-01-24	263			x		E	69	Verena Turco	F	Michael Platten	M	T cell-independent eradication of experimental glioma by intravenous TLR7/8-agonist-loaded nanoparticles	Glioblastoma, the most common and aggressive primary brain tumor type, is considered an immunologically “cold” tumor with sparse infiltration by adaptive immune cells. Immunosuppressive tumor-associated myeloid cells are drivers of tumor progression. Therefore, targeting and reprogramming intratumoral myeloid cells is an appealing therapeutic strategy. Here, we investigate a β-cyclodextrin nanopa…		5	x	The results of this manuscript are of potential interest, but fundamental rational for the observed effect of CDNPs, rather that physiological and in vivo response, are required: The tridimensional structure of CDNPs is not straightforward, and the incorporation of R848 is not clear. Also, the role of L-lysine must be explained. Being of particular relevance the findings that nanoparticles improv…	Overall, I think this is certainly an interesting paper that was a pleasure to read Here are some points that I would like to raise: - In response to many of the comments where the authors were asked to compare CDNP-R848 with R848, the group did two experiments, they showed an unremarkable spider plot and one bar plot showing tumor growth differences at week 7. Based on the data, I am not sure if…	N/A	N/A		-40	50	60	80					0	70	60	80					-20	60	60	80
8	https://www.nature.com/articles/s41467-023-36454-8			2022-06-19	2023-01-30	225	x				U	46.2	Rangjuan Cao		Lin Mei	M	Intrafusal-fiber LRP4 for muscle spindle formation and maintenance in adult and aged animals	Proprioception is sensed by muscle spindles for precise locomotion and body posture. Unlike the neuromuscular junction (NMJ) for muscle contraction which has been well studied, mechanisms of spindle formation are not well understood. Here we show that sensory nerve terminals are disrupted by the mutation of Lrp4, a gene required for NMJ formation; inducible knockout of Lrp4 in adult mice impairs …		1	x	Cao et al. report a role of Lrp4 derived from intrafusal fibers in the formation and maintenance of the sensory innervation of muscle spindles. The work is novel and in general well executed, and it will be of interest for a broad readership. It does not only address spindle development, but also spindle maintenance in aging. I have a number of points that need to be addressed by additional exper…	This is a nice informative manuscript that reveals a novel role for the LDL receptor family member LRP4 in the development and maintenance of proprioceptive muscle spindles. The study has been methodically conducted, the data are strong and the conclusions solid. This paper will be of broad interest and contribute major new insights into the mechanisms of muscle innervation. My only criticism con…	N/A	N/A		50	75	80	70					70	50	80	70					60	62.5	80	70
10	https://www.nature.com/articles/s41467-023-36390-7			2022-01-24	2023-01-27	368	x				U	81.5	Gustavo Balbinot	M	Jose Zariffa	M	Segmental motor recovery after cervical spinal cord injury relates to density and integrity of corticospinal tract projections	Cervical spinal cord injury (SCI) causes extensive impairments for individuals which may include dextrous hand function. Although prior work has focused on the recovery at the person-level, the factors determining the recovery of individual muscles are poorly understood. Here, we investigate the muscle-specific recovery after cervical spinal cord injury in a retrospective analysis of 748 individu…		5	x	This is a very thorough, important, and quite extensive piece of work. The main message seems to be that variability in recovery and difficulty of prediction increases with severity of the SCI, especially in the hand intrinsics. I have comments but they are not really major in anyway but would make, I think, the manuscript even better. 1. The main emphasis of the manuscript is muscle strength but…	Overall, the results of this study mirror observations of people recovering from stroke. Patients with initially mild upper limb impairment tend to recover well, with recovery closely related to initial impairment. In contrast, recovery cannot be predicted from clinical assessment alone for patients with initially more severe upper limb impairment. In both groups of patients, MEP status is a usef…	N/A	N/A		50	70	10	70					50	80	20	70					50	75	15	70
12	https://www.nature.com/articles/s41467-023-36096-w			2022-03-26	2023-01-13	293	x				U	98.5	Gong-Her Wu		Wah Chiu	M	CryoET reveals organelle phenotypes in huntington disease patient iPSC-derived and mouse primary neurons	Huntington’s disease (HD) is caused by an expanded CAG repeat in the huntingtin gene, yielding a Huntingtin protein with an expanded polyglutamine tract. While experiments with patient-derived induced pluripotent stem cells (iPSCs) can help understand disease, defining pathological biomarkers remains challenging. Here, we used cryogenic electron tomography to visualize neurites in HD patient iPSC…		1	x	The authors have applied cryogenic electron tomography in an attempt to identify early pathological biomarkers in neurites from iPSC-derived neurons from Huntington’s disease (HD) patients with varying CAG repeat expansions. In the HD lines, they discovered two types of aberrant structures: mitochondria with enlarged granules and distorted cristae, and thin sheet aggregates in double membrane-bou…	The presented manuscript is technically sound. The statistical analyses of granules and sheet aggregates in various cell types are properly conducted. The main findings are that both granules and sheet aggregates are altered in the HD cells, which maybe partially rescued by Pias1 KD or KO. Proteomic analysis points to a number of processes/pathways, yet the mechanism is still unclear. The identit…	This manuscript discovered HD-related mitochondrial phenotypes in neurons using a combination of CryoET and proteomics approach. Mitochondrial and autophagosome morphology from multiple hiPSCneuron lines and primary mouse neurons expressing human mHTT were examined in this study. Enlarged granules inside mitochondria are striking phenotype which was rescued or partially alleviated by PIAS1 KD. AI…	Thank you very much for asking me to review this manuscript from Wu et al. This is an interesting observational report which identifies intramitochondrial aggregates in the neurites of iPSC-neurons derived from patients and from mouse HD models. The numbers of granules/aggregates in the mito populations generally increased as a function of polyQ repeat, although this correlation was not complete.…		70	90	50	80	20	80	30	80	70	70	50	70	50	80	0	100	70	80	50	75	35	80	15
13	https://www.nature.com/articles/s41467-023-36388-1			2022-07-06	2023-01-30	208		x	x			92.7	Katerina Karkali	F	Enrique Martín-Blanco	M	JNK signaling in pioneer neurons organizes ventral nerve cord architecture in Drosophila embryos	Morphogenesis of the Central Nervous System (CNS) is a complex process that obeys precise architectural rules. Yet, the mechanisms dictating these rules remain unknown. Analyzing morphogenesis of the Drosophila embryo Ventral Nerve Cord (VNC), we observe that a tight control of JNK signaling is essential for attaining the final VNC architecture. JNK signaling in a specific subset of pioneer neuro…		1	x	Since I am not a neurobiology expert, when reviewing this manuscript the editor asked me to look specifically at the genetic aspects of the work; the nature of the different mutations and the utilization of the Gal4/UAS system to manipulate the expression of the JNK pathway. The experimental approach of the work is simple and straightforward: having described the overall structure of the ventral …	In this manuscript Karkali et al use spatial 3D correlation analysis to detect conserved domains within Fas2 expressing longitudinal axon bundles which they define as structural nodes. The distance among these structural nodes is used to determine defects in ventral nerve cord architecture in different genetic backgrounds. The authors analyze puk Loss-of-function, a background where the JNK pathw…	This manuscript by Karkali et al investigates the involvement of JNK signalling in nervous system morphogenesis in Drosophila embryos. They propose a network involving various genes that ultimately regulate cell adhesion and tension, to influence neuropile structure within each segment and ventral nerve cord condensation. The manuscript has abundant data focusing on the effect of loss or gain of …	N/A		50	75	0	60	20	50			80	70	-50	30	20	80			65	72.5	-25	45	20	65
14	https://www.nature.com/articles/s41467-023-36185-w			2022-01-14	2023-01-19	370			x		E	25.7	Caterina Marchioretti	F	Maria Pennuto	F	Defective excitation-contraction coupling and mitochondrial respiration precede mitochondrial Ca2+ accumulation in spinobulbar muscular atrophy skeletal muscle	Polyglutamine expansion in the androgen receptor (AR) causes spinobulbar muscular atrophy (SBMA). Skeletal muscle is a primary site of toxicity; however, the current understanding of the early pathological processes that occur and how they unfold during disease progression remains limited. Using transgenic and knock-in mice and patient-derived muscle biopsies, we show that SBMA mice in the presym…		1	x	Marchioretti, Zanetti et al. aim to explore early disease pathways driving skeletal muscle decline in Spinal and Bulbar Muscular Atrophy (SBMA), caused by a CAG repeat expansion of the Androgen Receptor (AR) gene. This manuscript uses microarray analysis of mouse models and SBMA patient biopsies to definitively implicate Excitation-Contraction Coupling (ECC) machinery dysregulation in skeletal mu…	The manuscript entitled “Defective excitation-contraction coupling and mitochondrial respiration precede mitochondrial Ca2+ accumulation in spinobulbar muscular atrophy skeletal muscle” by Marchionetti and colleagues aims to identify early pathological processes and how they unfold during the progression of the disease of spinobulbar muscular atrophy (SBMA). The authors use multiple experimental …	Spinal and bulbar muscular atrophy (SBMA) is a progressive late-onset motor neuron disease caused by abnormal CAG repeat expansions in the androgen receptor (AR) gene. Recent evidences suggest that not only motor neuron but also skeletal muscle are primary contributors to disease pathogenesis in SBMA. Pennuto and her colleague here demonstrated early and late events in SBMA muscles. The main find…	This manuscript is an attempt to describe the time course of events leading to the development of spinobulbar muscular atrophy. To that aim, they used a knock-in mice model showing that altered androgen receptor (AR) alters the generation of muscle force prior to denervation. The pattern of gene expression in the mice model mimics that of tissue from patients with the disease and it is interestin…		20	70	30	60	75	90	70	90	50	100	10	70	70	80	75	85	35	85	20	65	72.5	85	72.5
15	https://www.nature.com/articles/s41467-023-36025-x			2021-01-14	2023-01-12	728			x		E		Joana Cabral	F	Noam Shemesh	M	Intrinsic macroscale oscillatory modes driving long range functional connectivity in female rat brains detected by ultrafast fMRI	Spontaneous fluctuations in functional magnetic resonance imaging (fMRI) signals correlate across distant brain areas, shaping functionally relevant intrinsic networks. However, the generative mechanism of fMRI signal correlations, and in particular the link with locally-detected ultra-slow oscillations, are not fully understood. To investigate this link, we record ultrafast ultrahigh field fMRI …		5	x	In this manuscript, the authors developed an ultra-fast fMRI paradigm to track high-frequency brain functional oscillations, attempting to probe the fundamental mechanism underlying brain functional connectivity. They showed that obtained fMRI time course could be well fitted by a wave model; and hence concluded that observed spontaneous functional activity was driven by these resonant modes. Whi…	Cabral et al. present an analysis of the low-dimensional components of rat fMRI, at 'ultrafast' temporal resolution in a slice and at standard temporal resolution in the whole brain. Applying a linear dimensionality reduction method based on covariance modes (resembling principal components analysis), they find spatial modes that resemble standing-wave patterns with time courses that have oscilla…	Cabral et al have analyzed ultra-fast single slice fMRI data from rats in three different states from sedation to full anesthesia. Along this gradient they find a reduction in the number of "modes" defined as the eigenvectors of the covariance matrix. They also projected the empirical data back onto a lower dimensional space defined by a small number of modes and demonstrate that these models are…	N/A		5	70	-40	5	80	80			-15	50	-75	20	40	60			-5	60	-57.5	12.5	60	70
16	https://www.nature.com/articles/s41467-023-36324-3			2022-03-10	2023-01-26	322			x		E	58.7	Sverre Grødem	M	Marianne Fyhn	F	An updated suite of viral vectors for in vivo calcium imaging using intracerebral and retro-orbital injections in male mice	Genetically encoded Ca2+ indicators (GECIs) are widely used to measure neural activity. Here, we explore the use of systemically administered PHP.eB AAVs for brain-wide expression of GECIs and compare the expression properties to intracerebrally injected AAVs in male mice. We show that systemic administration is a promising strategy for imaging neural activity. Next, we establish the use of EE-RR…		2	x	In this manuscript, “An updated suite of viral vectors for in vivo calcium imaging using local and retro- orbital injections,” the authors describe the use of retro-orbital injections of AAV PHP.eB GCaMPs for systemic delivery of genetically-encoded calcium indicators. This method allows for cerebral expression without the need to develop transgenic animals or perform intracranial injections. The…	The data presented in this manuscript represent an extensive analysis of the performance of various calcium sensors expressed through AAV systemic or local delivery. The comparison of various versions of GCaMP represents interesting and relevant results to be shared with the community and I greatly appreciate that the authors have included negative results for most f versions of the sensor. The t…	There are multiple advantages of viral vectors for driving expression of GECIs as opposed to using transgenic animals. The engineered capsid PHB.eB enables systemic delivery of AAVs which then drive expression in brain. This paper provides practical guidance for using viral vectors for labeling neurons using both systemic and localized injection. Several different types of GCaMP were screened for…	N/A		50	70	60	80	30	70			50	80	60	90	40	80			50	75	60	85	35	75
17	https://www.nature.com/articles/s41467-023-36217-5			2021-12-20	2023-01-20	396			x		E	40	Patrick Jendritza	M	Pascal Fries	M	Multi-area recordings and optogenetics in the awake, behaving marmoset	The common marmoset has emerged as a key model in neuroscience. Marmosets are small in size, show great potential for genetic modification and exhibit complex behaviors. Thus, it is necessary to develop technology that enables monitoring and manipulation of the underlying neural circuits. Here, we describe a novel approach to record and optogenetically manipulate neural activity in awake, behavin…		2	x	The manuscript by Jendritza and colleagues presents a novel methodology for multi-area recordings and optogenetic stimulation in visual cortex of the marmoset monkey with note worthy results. It presents a methodology that will be of high significance in the emerging marmoset animal model. The manuscript is well written and provides excellent illustrations. The methods are sound and exceed standa…	This manuscript describes novel instrumentation and procedures that allow the simultaneous recording of multiple neurons from two areas of the brain of awake, behaving marmosets, with optional optogenetic stimulation. Recordings are shown to be stable and of high quality. Optogenetic stimulation of area V6 influenced behavior in a near-threshold visual saccade task. None of the results presented …	This study described a sophisticated and well-described method of preparing marmosets for combined fiber-based optogenetics and multi-electrode electrophysiology. It's a tour de force of methodological engineering in a species that is quite tricky to use. The paper is well written and clear. Major comment: The experimental aspects of the study are straightforward and though not themselves groundb…	N/A		90	80	80	80	80	70			80	90	60	80	80	90			85	85	70	80	80	80
18	https://www.nature.com/articles/s41467-023-35819-3			2022-02-15	2023-01-03	322			x		E	50.6	Isabella C. Wagner	F	Claus Lamm	M	Entorhinal grid-like codes and time-locked network dynamics track others navigating through space	Navigating through crowded, dynamically changing environments requires the ability to keep track of other individuals. Grid cells in the entorhinal cortex are a central component of self-related navigation but whether they also track others’ movement is unclear. Here, we propose that entorhinal grid-like codes make an essential contribution to socio-spatial navigation. Sixty human participants un…		2	x	Wagner et al. describe results from an fMRI study investigating grid-like BOLD signals while navigating and while observing others as they navigate through space. Participants viewed an avatar (demonstrator) as it navigated to three waypoints along the perimeter of a circular space. Following this observation period, participants were tasked with retracing the path of the demonstrator. The author…	In their article, “Entorhinal grid-like codes and time-locked network dynamics track others navigation through space,” Wagner et al. use fMRI (n = 60 participants) to show that grid-like codes in the entorhinal cortex track another individual who navigates through a virtual spatial environment. The task contained two main periods: observation (in which the subject observed the navigation path of …	Wagner et al. studied grid-like codes in the human entorhinal cortex during a spatial route retracing task. Participants completed a virtual reality navigation task while in the fMRI scanner. On each trial they first observed a human-like avatar traverse the virtual space and after a short delay were asked to retrace the same path from a first-person perspective. The authors found increased entor…	N/A		50	70	60	80	20	60			70	50	50	70	10	80			60	60	55	75	15	70
20	https://www.nature.com/articles/s41467-023-36260-2			2022-06-20	2023-01-23	217		x			A		Yiwei Gao		Yan Zhao		Molecular insights into the gating mechanisms of voltage-gated calcium channel CaV2.3	High-voltage-activated R-type CaV2.3 channel plays pivotal roles in many physiological activities and is implicated in epilepsy, convulsions, and other neurodevelopmental impairments. Here, we determine the high-resolution cryo-electron microscopy (cryo-EM) structure of human CaV2.3 in complex with the α2δ1 and β1 subunits. The VSDII is stabilized in the resting state. Electrophysiological experi…		1	x	The manuscript by Y Gao et al “Molecular insights into the gating kinetics of voltage-gated calcium channel CaV2.3” is devoted to structural and functional study of Cav2.3 channel. The topic of study is actual; the work has excellent novelty and executed using state-of-the-art methodology. To my opinion, the manuscript could be accepted for publication in Nature Communications after minor revisio…	Yiwei Gao and collaborators present the first high-resolution (3.1 Angstrom) cryo-EM structure of the human R-type voltage gated calcium channel CaV2.3. The structure of the pore forming subunit alpha1E is resolved in complex with the accessory subunits alpha2delta1 and beta1 providing the original information about the organization of this macromolecule. CaV2.3 pore is in the closed state stabil…	Remarks to the Author: Voltage-gated calcium channels mediate calcium ion flux across the membrane of excitable cells. Among the calcium channels, Cav2.3 plays an important role in neurotransmitter release and is associated with neuronal dysfunctions such as epilepsy. However, there was little available structural information of Cav2.3 channel and thus understanding of the molecular mechanism of …	N/A		80	70	70	80	80	70			60	80	80	80	70	80			70	75	75	80	75	75
22	https://www.nature.com/articles/s41467-023-36070-6			2021-06-19	2023-01-13	573			x		E		Amira Sayed Hanafy	F	Dirk Dietrich	M	Subcellular analysis of blood-brain barrier function by micro-impalement of vessels in acute brain slices	The blood-brain barrier (BBB) is a tightly and actively regulated vascular barrier. Answering fundamental biological and translational questions about the BBB with currently available approaches is hampered by a trade-off between accessibility and biological validity. We report an approach combining micropipette-based local perfusion of capillaries in acute brain slices with multiphoton microscop…		1	x	The manuscript entitled "High-resolution analysis of blood-brain barrier function by micro-impalement of capillaries in brain slices" by Steinlein and colleagues describes a new method to study the integrity of the blood-brain barrier in acute brain slices from mice and human samples. The technique developed by the Dietrich lab shows interesting avenues but requires additional validation. The app…	In this methods paper, Steinlein et al. describe establishing an in situ microperfusion method in brain slices that allows assessing blood-brain barrier function, specifically transporter function and barrier leakage. The idea of such a microperfusion is not new and has been discussed in the brain barriers field for decades. To the authors’ credit, they now established this method. The authors de…	N/A	N/A		20	80	10	60					20	60	0	40					20	70	5	50
25	https://www.nature.com/articles/s41467-023-36042-w			2020-09-29	2023-01-13	836	x				U	89	Karen Perez de Arce	F	Thomas Biederer	M	Concerted roles of LRRTM1 and SynCAM 1 in organizing prefrontal cortex synapses and cognitive functions	Multiple trans-synaptic complexes organize synapse development, yet their roles in the mature brain and cooperation remain unclear. We analyzed the postsynaptic adhesion protein LRRTM1 in the prefrontal cortex (PFC), a region relevant to cognition and disorders. LRRTM1 knockout (KO) mice had fewer synapses, and we asked whether other synapse organizers counteract further loss. This determined tha…		1	x	This manuscript from the Biederer lab investigates the potential co-operativity between 2 synaptic adhesion molecules, LRRTM1 and SynCAM1 in the rodent prefrontal cortex (PFC). This is interesting, due to the numerous different adhesion molecules that coordinate synapse organization and number in the brain, but less is known about how they might work together, and how much redundancy there is in …	In this paper, Dr. Biederer’s group has shown the interdependent synaptic expression of LRRTM1 and SynCAM1 in the medial prefrontal cortex (mPFC) and their concerted functions for regulating schizophrenia-relevant behaviors, excitatory synapse number and so on. Specifically, their immunohistochemical and biochemical analyses show that the mPFC in LRRTM1 KO mice has a significant reduction of exci…	The manuscript of deArce et al., addresses the important issue of how synaptogenesis is achieved through specific transsynaptic molecular complexes. The authors demonstrate using mouse genetic models and biochemical studies that two postsynaptic transmembrane proteins linked to schizophrenia LRRTM1 and SynCAM 1, work in concert to achieve excitatory synapse formation in the medial prefrontal cort…	N/A		60	75	20	60	80	90			70	60	40	75	90	80			65	67.5	30	67.5	85	85
26	https://www.nature.com/articles/s41467-023-36133-8			2020-07-29	2023-01-17	902				x	O	81.6	Y. Wang		Kenneth Nisbet	M	Hydrogel oxygen reservoirs increase functional integration of neural stem cell grafts by meeting metabolic demands	Injectable biomimetic hydrogels have great potential for use in regenerative medicine as cellular delivery vectors. However, they can suffer from issues relating to hypoxia, including poor cell survival, differentiation, and functional integration owing to the lack of an established vascular network. Here we engineer a hybrid myoglobin:peptide hydrogel that can concomitantly deliver stem cells an…		1	x	This is an interesting study which focusses on developing a myoglobin laden peptide hydrogel with the aim of sustaining the in vivo delivery of oxygen to stem cells grafts, positively impacting cell survival, integration and differentiation. The study presents some novelties- particularly on the use of myoglobin for this application. It also builds on an existing platform developed by the applica…	In this manuscript, the authors demonstrated a novel method to fabricate injectable, oxygenreleasing biomaterials that can be used as carriers for cell-based therapies and evaluate the utility of this biomaterial in a rodent model of stroke. This work is highly innovative, the experiment methods sound, and the results potentially beneficial for neural tissue regeneration. However, there are a few…	The manuscript by Wang et al. is aiming to solve the lack of oxygen within cell grafts after transplantation into the brain and thus increase cell survival. The proposed solution of using an engineered hybrid hydrogel, containing oxygen-binding myoglobin, is innovative and interesting, and the results seem promising. The platform has the potential be used for a variety of injuries and neurodegene…	N/A		20	70	50	80	60	70			10	80	60	80	80	50			15	75	55	80	70	60
28	https://www.nature.com/articles/s41467-023-36174-z			2019-10-21	2023-01-17	1184	x				U	25.3	Weam S. Shahin		John F. Engelhardt	M	Redox-dependent Igfbp2 signaling controls Brca1 DNA damage response to govern neural stem cell fate	Neural stem cell (NSC) maintenance and functions are regulated by reactive oxygen species (ROS). However, the mechanisms by which ROS control NSC behavior remain unclear. Here we report that ROS-dependent Igfbp2 signaling controls DNA repair pathways which balance NSC self-renewal and lineage commitment. Ncf1 or Igfbp2 deficiency constrains NSCs to a self-renewing state and prevents neurosphere f…		1	x	Overall there are some interesting findings in this study associated with the impact of loss of Ncf1 in NSCs. However, some of the presented data is phenomenological with conclusions that are unclear/equivocal. The claim that inactivating DNA repair promotes neurosphere forming ability (i.e. similar to WT cells) is surprising and it’s difficult to understand why inhibiting key genome stability fa…	This is a very interesting study in which Shahin and colleagues show that redox regulation of Igfbp2 controls Brca1 DNA damage to govern neural stem cell fate. To achieve such a conclusion, the authors used a genetic mouse model lacking the NADPH oxidase component Ncf1, hence significantly reducing the level of endogenous ROS formation. By controlling endogenous ROS production, the authors found …	The NADPH oxidase complex (NOX/NCF1) is a major source for the generation of reactive oxygen species. The manuscript “Redox-Dependent Igfbp2 Signaling Controls Brca1 DNA Damage Response to Govern Neural Stem Cell Fate” by Shahin and colleagues investigates the function of the NADPH oxidase complex in the control of neural stem cells in the adult brain. To this end the authors examine Ncf1 knockou…	N/A		-30	20	80	70	10	90			-40	20	60	80	5	80			-35	20	70	75	7.5	85
29	https://www.nature.com/articles/s41467-023-35825-5			2022-02-17	2023-01-03	320	x				U	81.9	Guillaume Etter	M	Sylvain Williams	M	Optogenetic frequency scrambling of hippocampal theta oscillations dissociates working memory retrieval from hippocampal spatiotemporal codes	The precise temporal coordination of activity in the brain is thought to be fundamental for memory function. Inhibitory neurons in the medial septum provide a prominent source of innervation to the hippocampus and play a major role in controlling hippocampal theta (~8 Hz) oscillations. While pharmacological inhibition of medial septal neurons is known to disrupt memory, the exact role of septal i…		2	x	Etter et al. examine object place memory and delayed alternation in mice under conditions wherein gabaergic septal inputs to the hippocampus are optogenetically stimulated either at 8 Hz (mimicking the theta-frequency rhythm generated in hippocampus by septal inputs) or with an irregular pattern (designed to eliminate the theta-frequency rhythm). The authors also provide the same stimulus protoco…	In this manuscript by Etter et al by the Williams group, the authors investigate the impact of medial septal (MS) manipulations on hippocampal neural dynamics and working memory performance by using optogenetics manipulations of septal PV GABAergic neurons and miniscope calcium imaging. They report that optogenetic frequency scrambling of MS GABAergic PV+ cells’ activity abolishes theta oscillati…	N/A	N/A		10	70	60	70					0	70	30	80					5	70	45	75
30	https://www.nature.com/articles/s41467-023-36046-6			2022-06-19	2023-01-13	208		x			A		Lei Yang		Chen Zhang		Rabphilin-3A undergoes phase separation to regulate GluN2A mobility and surface clustering	N-methyl-D-aspartate receptors (NMDARs) are essential for excitatory neurotransmission and synaptic plasticity. GluN2A and GluN2B, two predominant Glu2N subunits of NMDARs in the hippocampus and the cortex, display distinct clustered distribution patterns and mobility at synaptic and extrasynaptic sites. However, how GluN2A clusters are specifically organized and stabilized remains poorly underst…		1	x	The manuscript by Yang, Wei, Wang and coworkers addresses a relevant topic in the field of glutamatergic neurotransmission, namely the characterization of the detailed molecular mechanisms involved in subunit specific regulation NMDA receptors. Starting from previous studies demonstrating that Rph3A regulates the surface retention of GluN2A-containing NMDA receptors, the authors found that phase …	In this manuscript, the authors discovered that Rabphilin 3a (RPH3A), a previously identified GluN2A binding proteins, has a capacity to undergo phase separation in heterologous cells and in vitro. The authors further showed that the residues 1-91 of RPH3A, which is an intrinsically disordered domain (IDR1), is responsible for the phase separation of RPH3A. The authors identified that 9 Arg resid…	The work from Yang et. al. is substantial work that addresses if the scaffolding protein RPH3A can promote clustering of N-methyl-D-aspartate receptors through liquid-liquid phase separation and, subsequently, the functional consequences of clustering in cells. The work used mix of in cell studies, including the optogenetics platform, and in vitro reconstitution of RPH3A to demonstrate this prote…	N/A		80	80	30	60	60	80			50	80	50	70	70	50			65	80	40	65	65	65
31	https://www.nature.com/articles/s41467-022-35654-y			2021-02-10	2022-12-15	673	x				U	97	Kiyohito Iigaya	M	John P. O’Doherty	M	Neural mechanisms underlying the hierarchical construction of perceived aesthetic value	Little is known about how the brain computes the perceived aesthetic value of complex stimuli such as visual art. Here, we used computational methods in combination with functional neuroimaging to provide evidence that the aesthetic value of a visual stimulus is computed in a hierarchical manner via a weighted integration over both low and high level stimulus features contained in early and late …		3	x	The manuscript by Iigaya et al. investigates the nature of how aesthetic value is computed in the human brain. A large fMRI dataset is collected in response to subjects perceiving and making subjective value judgments on visual artistic stimuli; this dataset emphasizes large amounts of fMRI data in a small number of subjects. Several computationally sophisticated analyses and models are brought t…	I enjoyed reading this manuscript, and believe that it makes an important contribution not only to the domains of neuroaesthetics and empirical aesthetics, but also to neuroeconomics more broadly. As the authors have noted, because their value construction model proposed and tested here is agnostic to the type of object that is being evaluated, it can potentially be applied to all sorts of other …	N/A	N/A		60	80	90	90					50	60	90	70					55	70	90	80
34	https://www.nature.com/articles/s41467-022-35724-1			2021-08-08	2022-12-21	500			x		E	26.8	Salim Megat		Luc Dupuis	M	Integrative genetic analysis illuminates ALS heritability and identifies risk genes	Amyotrophic lateral sclerosis (ALS) has substantial heritability, in part shared with fronto-temporal dementia (FTD). We show that ALS heritability is enriched in splicing variants and in binding sites of 6 RNA-binding proteins including TDP-43 and FUS. A transcriptome wide association study (TWAS) identified 6 loci associated with ALS, including in NUP50 encoding for the nucleopore basket protei…		5	x	Alterations to the composition and function of the nuclear pore complex are widely considered a prominent pathologic hallmark of ALS. Recently, a number of studies have begun to identify genomic variants as risk factors for ALS pathogenesis. In this study, Megat and colleagues identify variants in the Nup50 gene in 23 ALS patients. They show that these variant lead to decreased Nup50 expression a…	The study includes the application of transcriptome-wide association analysis to studying the genetic architecture of ALS. Using TWAS, the authors find 59 genes significantly associated with ALS. Among the newly associated genes (45), the authors observed the decreased expression of NUP50, encoding a nuclear pore complex protein. In follow-up experiments, they show decrease expression of NUP50 in…	This manuscript from Megat and colleagues is composed by two parts. In the first part, the latest ALS GWAS is analysed in combination with a) cell-specific ATAC-seq data to define different cell type contributions, b) eQTL, meQTL, sQTL and pQTL data to identify processes relevant to ALS (and not to other NDDs). Results are then complemented by PRS scores, from large DNA resources. In the second p…	N/A		-60	30	10	80	50	70			-70	25	0	80	20	70			-65	27.5	5	80	35	70
37	https://www.nature.com/articles/s41467-022-35680-w			2021-12-24	2022-12-19	360			x		E	56.3	Nicky Scheefhals	F	Harold D. MacGillavry	M	mGluR5 is transiently confined in perisynaptic nanodomains to shape synaptic function	The unique perisynaptic distribution of postsynaptic metabotropic glutamate receptors (mGluRs) at excitatory synapses is predicted to directly shape synaptic function, but mechanistic insight into how this distribution is regulated and impacts synaptic signaling is lacking. We used live-cell and super-resolution imaging approaches, and developed molecular tools to resolve and acutely manipulate t…		1	x	In this work, using state of the art microscopy technologies, Scheeefhals and collaborators reinvestigated the subsynaptic organization of mGluR5 and its dynamics at excitatory synapses. Their experiments confirm a largely perisynaptic expression of the mGluR5 receptor, revealing that 55 % of the mGluR5 population is organized as clusters juxtaposed to the PSD. A small fraction of the mGluR5 popu…	Previous studies have found mGluR5 receptors organized in perisynaptic nano-domains with respect to the postsynapse. Here, Scheefhals et al. confirm and extend on these findings to disclose the dynamic organization of mGluR5 at synapses, showing that mGluR5 movement is perisynaptically confined, with the location and dynamics controlled through the c-terminal domain. The authors move on to invest…	Scheefhals et al. aims to determine the behavior of the mGluR5 at the synapse by using superresolution techniques. The main conclusions are that mGluR5 have some transient trapping at the perisynapse but is mainly excluded from the PSD, the Cterm tail of mGluR5 is implicated in the trapping, the overaccumulation of mGluR5 at the PSD would increase the frequency of calcium entry at spine. The pape…	N/A		70	80	50	70	40	70			70	80	30	65	60	50			70	80	40	67.5	50	60
38	https://www.nature.com/articles/s41467-023-35836-2			2022-02-13	2023-01-03	324		x			A	80.6	Samuel K. H. Sy	M	Ho Ko	M	An optofluidic platform for interrogating chemosensory behavior and brainwide neural representation in larval zebrafish	Studying chemosensory processing desires precise chemical cue presentation, behavioral response monitoring, and large-scale neuronal activity recording. Here we present Fish-on-Chips, a set of optofluidic tools for highly-controlled chemical delivery while simultaneously imaging behavioral outputs and whole-brain neuronal activities at cellular resolution in larval zebrafish. These include a flui…		2	x	Sy et al. present an optofluidic platform for studying zebrafish larvae behavior in the presence of chemical cues. The tools include precisely controlled chemical delivery, a microfluidic arena and an integrated light sheet microscopy system. Overall, the authors present an impressive setup with convincing data. The text is very well written. Major remarks: - I find it a bit confusing how many di…	The authors have reported the application of two microfluidic devices, one for behavioral screening and one for light sheet brain-wide neuronal GCaMP6f imaging of zebrafish larvae. The former device allows the larvae to move freely in response to cadaverine brought into a chamber at its corners. The latter immobilize the head of the larva while allowing the tail to move in a chamber. The two nasa…	The authors present a technically demanding and impressive study to analyse neural circuits activated by odors, together with the behavior elicited by these odors. Larval zebrafish are used as model system due to their transparency and small size, which allows whole brain imaging. Tail flipping movements can be recorded in parallel with imaging, unfettered movements are recorded in a separate are…	N/A		80	90	60	70	90	70			75	85	40	60	60	80			77.5	87.5	50	65	75	75
41	https://www.nature.com/articles/s41467-023-35824-6			2021-09-15	2023-01-03	475		x			A	85.3	Javier G. Orlandi	M	Andrea Benucci	M	Distributed context-dependent choice information in mouse posterior cortex	Choice information appears in multi-area brain networks mixed with sensory, motor, and cognitive variables. In the posterior cortex—traditionally implicated in decision computations—the presence, strength, and area specificity of choice signals are highly variable, limiting a cohesive understanding of their computational significance. Examining the mesoscale activity in the mouse posterior cortex…		2	x	Orlandi et al study the representation of task-related variables across a network of posterior cortical areas in mice performing an interesting perceptual discrimination task. Activity is measured with mesoscale calcium imaging and analyzed at the population level with dedicated analysis techniques. The primary goals are to identify choice-related activity across posterior cortex, to relate this …	Several studies have shown that the representations of choice information can be found the occipital, parietal, and frontal cortices, but determining whether these representations across areas are comparable, and separating these choice signals from stimulus and motor information, has been challenging. To investigate choice representation, mice in this study are trained to perform a challenging 2…	The authors recorded wide-field calcium imaging data in mice during a perceptual discrimination task. The task consisted of turning a wheel to indicate which of 2 oriented gratings were most similar to a target orientation. The authors used localNMF to decompose data into spatially-dominated components and then conducted a decoding analysis to establish encoding axes for a variety of task variabl…	N/A		40	90	80	80	50	80			20	80	80	50	50	75			30	85	80	65	50	77.5
42	https://www.nature.com/articles/s41467-022-35397-w			2022-02-20	2022-11-30	283		x			A	44.1	Moe Okayasu		Koji Jimura	M	The Stroop effect involves an excitatory–inhibitory fronto-cerebellar loop	The Stroop effect is a classical, well-known behavioral phenomenon in humans that refers to robust interference between language and color information. It remains unclear, however, when the interference occurs and how it is resolved in the brain. Here we show that the Stroop effect occurs during perception of color–word stimuli and involves a cross-hemispheric, excitatory–inhibitory loop function…		3	x	This study aimed to examine the neural mechanisms underlying the Stroop effect by manipulating stimulus (verbal, non-verbal) and response (vocal, manual) modality. Authors suggest that the Stroop effect would be resolved by an excitatory-inhibitory loop involving the left prefrontal cortex and the right cerebellum, with an excitatory connectivity from the prefrontal cortex to the cerebellum and a…	Okayasu et al. implemented a comparison between a typical color-word Stroop task and a non-verbal (Swimmy) interference task. The authors suggested that the results revealed language specific neural underpinnings in the Stroop task. The tasks are well implemented, and the experiments seem wellpowered (n~30 in each sub-experiment). However, some critical issues have also arisen during the course o…	In the current manuscript the authors aimed to dissociate the role of language and non-language frontocerebellar circuits in resolving Stroop interference. To accomplish this, participants performed either the Stroop task or a novel non-language conflict task (Swimmy task) with vocal or motor responses. The authors found common activation in left lateral prefrontal cortex and right posterior cere…	N/A		20	80	0	75	0	80			-40	50	0	70	0	70			-10	65	0	72.5	0	75
43	https://www.nature.com/articles/s41467-022-35535-4			2022-06-28	2022-12-08	163	x				U	89	Cian McCafferty		Hal Blumenfeld	M	Decreased but diverse activity of cortical and thalamic neurons in consciousness-impairing rodent absence seizures	Absence seizures are brief episodes of impaired consciousness, behavioral arrest, and unresponsiveness, with yet-unknown neuronal mechanisms. Here we report that an awake female rat model recapitulates the behavioral, electroencephalographic, and cortical functional magnetic resonance imaging characteristics of human absence seizures. Neuronally, seizures feature overall decreased but rhythmic fi…		5	x	The present manuscript by McCafferty et al addresses a number of important unsolved issues pertaining to the neuronal basis behind the pathophysiology of absence epilepsy including reduced awareness and engaged behavior, as well as the translational value of rodent model organisms that have been used to study this disease for decades. Despite a broad variety of species, recording techniques and a…	This submission by McCafferty et al. is exceptionally significant to the fields of neurobiology of disease, neuroscience of consciousness, and thalamocortical network physiology. Their paper addresses two key problems concerning the understanding of the neurophysiology of absence seizures: 1) the apparent discrepancies between animal absence seizure models regarding cortical activation and consci…	The manuscript by McCafferty et al. explore the neuronal basis of impaired consciousness in absence seizures. They used a well-accepted spontaneous rat model for human absence epilepsy and combined EEG recordings with behavioural measures and fMRI of awake, restrainedhabituated GAERS rats. The manuscript is well-written. Methods seem well-established and are described in detail. Overall conclusio…	N/A		90	90	90	80	75	90			80	90	85	80	80	90			85	90	87.5	80	77.5	90
44	https://www.nature.com/articles/s41467-023-35822-8			2022-02-16	2023-01-03	321	x				U		James P. Roach	M	Tatiana A. Engel	F	Choice selective inhibition drives stability and competition in decision circuits	During perceptual decision-making, the firing rates of cortical neurons reflect upcoming choices. Recent work showed that excitatory and inhibitory neurons are equally selective for choice. However, the functional consequences of inhibitory choice selectivity in decision-making circuits are unknown. We developed a circuit model of decision-making which accounts for the specificity of inputs to an…		2	x	The authors present an in-depth computational study of perceptual decision making, taking into account the recent experimental finding on inhibitory neural selectivity (Najafi et al. 2019) which is not captured by classical neurobiological models of decision making (Wong and Wang 2006). The present study uses both a mean-field analysis and recurrent neural network (RNN) simulations to uncover a d…	The manuscript titled "Two roles for choice selective inhibition in decision-making circuits" investigates the functional contributions of selective inhibitory neurons underlying perceptual decision-making by using computational modelling of attractor networks and theoretical analysis to show that selective inhibition can maximise competition and stabilise strongly connected excitatory neurons du…	N/A	N/A		80	80	0	70					80	70	0	70					80	75	0	70
45	https://www.nature.com/articles/s41467-022-35747-8			2022-04-26	2022-12-22	240			x		A		Michalis Pagkalos	M	Panayiota Poirazi	F	Introducing the Dendrify framework for incorporating dendrites to spiking neural networks	Computational modeling has been indispensable for understanding how subcellular neuronal features influence circuit processing. However, the role of dendritic computations in network-level operations remains largely unexplored. This is partly because existing tools do not allow the development of realistic and efficient network models that account for dendrites. Current spiking neural networks, a…		4	x	Dear Authors! You present the software tool Dendrify. A Python package that seeks to extend Brian2 with primitives to allow for modelling of simplified multi-compartment neuron models. The topic is of interest to both the computational neuroscience and neuromorphic community. The paper is written well, text and figures are clear and engaging. The manuscript presents Dendrify on four examples of i…	The authors introduce a python-package to facilitate the modeling of dendritic compartments in spiking networks. The objective is an easy to use and computationally efficient framework which captures dendritic features currently omitted in the simulation packages. On the basis of developments in neurophysiology, computational neuroscience, and recent results in the field of machine learning, they…	N/A	N/A		80	80	80	80					75	90	80	70					77.5	85	80	75
46	https://www.nature.com/articles/s41467-022-35753-w			2021-03-21	2022-12-23	642	x				U		Noah R. Johnson	M	Carlo Condello	M	CSF1R inhibitors induce a sex-specific resilient microglial phenotype and functional rescue in a tauopathy mouse model	Microglia are central to pathogenesis in many neurological conditions. Drugs targeting colony-stimulating factor-1 receptor (CSF1R) to block microglial proliferation in preclinical disease models have shown mixed outcomes, thus the therapeutic potential of this approach remains unclear. Here, we show that CSF1R inhibitors given by multiple dosing paradigms in the Tg2541 tauopathy mouse model caus…		5	x	In this manuscript, Johnson et al investigate the impact of CSF1R inhibition-mediated microglia depletion in a tauopathy model. This is of importance as tauopathy is considered to contribute to neurodegeneration, for instance in the common neurodegenerative disorder Alzheimer’s disease, yet we do not have approved therapies to intervene. CSF1R inhibition is a commonly used tool in experimental mo…	The manuscript by Johnson et al. describes an interesting concept, connecting microglia and tauopathy and gender. Yet, the manuscript in its present form reads like a collection of partial stories that were not fully explored or integrated, and the conclusions are appealing but not fully supported and mechanistically clear. Specific comments: Figure 1: The authors found that depletion of microgli…	The current study use a comprehensive treatment paradigms of CSF1R inhibitors to evaluate the roles of CSF1R inhibition in Tau-related pathology. They observed consistent reduction in the levels of pathogenic tau in the brains of both male and female Tg2541 mice with PLX treatment. Interestingly, only female mice benefited from extended survival, functional rescue, and reduced NfL levels. Hence, …	N/A		60	90	0	0	40	60			30	85	-30	60	50	70			45	87.5	-15	30	45	65
47	https://www.nature.com/articles/s41467-022-35656-w			2022-01-20	2022-12-15	329	x				U	58.8	Sunny Nigam	M	Valentin Dragoi	M	Adaptive coding across visual features during free-viewing and fixation conditions	Theoretical studies have long proposed that adaptation allows the brain to effectively use the limited response range of sensory neurons to encode widely varying natural inputs. However, despite this influential view, experimental studies have exclusively focused on how the neural code adapts to a range of stimuli lying along a single feature axis, such as orientation or contrast. Here, we perfor…		2	x	The manuscript "Adaptive coding of naturalistic signals in visual cortex" by Nigam, Milton, Pojoga and Dragoi investigates the question of cross-stimulus adaptation of V4 neurons. Despite the title and Figure 1a, this is not a study with naturalistic stimuli, which is disappointing. The key results are that a decoder increased performance to dissociate between color stimuli when neurons were adap…	This study addresses an important question regarding neuronal adaptation during natural viewing conditions. That is, during natural eye movements, the statistics of each viewed patch may differ significantly, entailing stimulation by features of different feature spaces (e.g. orientation vs color content). However, few studies have systematically examined the effects of such cross-feature activat…	This paper describes the effects of cross-feature adaptation in area V4 of the monkey. While the results may be interesting and important, there are several problems with this paper that make it very difficult to evaluate in its current state. My comments are listed below. Main comments 1. Why is cross-feature adaptation important and why is it useful? In general, adaptation is useful because it …	N/A		-40	30	80	90	0	70			-20	10	60	70	0	80			-30	20	70	80	0	75
48	https://www.nature.com/articles/s41467-022-35494-w			2022-04-26	2022-12-06	224	x				U	41.8	Jarrett Eshima	M	Barbara S. Smith	F	Molecular subtypes of ALS are associated with differences in patient prognosis	Amyotrophic Lateral Sclerosis (ALS) is a neurodegenerative disease with poorly understood clinical heterogeneity, underscored by significant differences in patient age at onset, symptom progression, therapeutic response, disease duration, and comorbidity presentation. We perform a patient stratification analysis to better understand the variability in ALS pathology, utilizing postmortem frontal a…		5	x	Eshima and colleagues re-analyse a large dataset of transcriptomes from the NYGC ALS Consortium. Combining estimates of gene and transposable element expression from frontal and motor cortex, they use non-negative matrix factorisation to split the cohort into three subclusters. Although this is an approach performed previously by Tam et al (on a smaller subset of samples), Eshima and colleagues a…	In the manuscript entitled “Molecular subtypes of ALS are associated with differences in patient prognosis”, Eshima et al. analyzed a large set of RNA-seq data from the frontal and motor cortices of ALS patients to distinguish molecular subtypes of ALS based on common gene expression signatures, which also included transposable elements (TEs) mapping uniquely to loci and quantified. They defined …	Esthima et al. address the question of heterogeneity in ALS by reanalyzing bulk RNAseq data from the motor/frontal cortex of over 200 patients and performing a patient stratification analysis. They identified 3 molecular subtypes, ALS- Glia (glia activation); ALS-Ox (oxidative stress and altered synaptic signaling), and ALS-TD (transcriptional dysregulation), and linked them to the age of onset a…	N/A		50	70	25	80	-20	80			70	80	20	60	0	50			60	75	22.5	70	-10	65
50	https://www.nature.com/articles/s41467-022-35758-5			2022-01-14	2022-12-27	347	x				U	81.5	Huan Sheng		Ping Zheng	M	Nucleus accumbens circuit disinhibits lateral hypothalamus glutamatergic neurons contributing to morphine withdrawal memory in male mice	The lateral hypothalamus (LH) is physiologically critical in brain functions. The LH also plays an important role in drug addiction. However, neural circuits underlying LH involvement of drug addiction remain obscure. In the present study,our results showed that in male mice, during context-induced expression of morphine withdrawal memory, LH glutamatergic neurons played an important role; dopami…		2	x	I have reviewed with eager interest the manuscript entitled “Disinhibited lateral hypothalamus glutamatergic neurons by circuits from nucleus accumbens contribute to withdrawal memory retrieval” by Huan Sheng et al. The manuscript shows that a specific population of LH glutamate neurons is FOCactivated during the retrieval of morphine withdrawal memory in mice previously conditioned to a context …	This manuscript have been addressed an interesting hypothesis that the DA1-MSNs of nucleus accumbens core (NAcC) to lateral hypothalamus (LH) activate the LH glutamatergic neurons. The present study suggests that the activation of LH glutamatergic neurons plays an important role in the retrieval of morphine withdrawal memory. This activation of LH glutamatergic neurons is initiated by DA1-MSNs of…	In this manuscript by Sheng, Lei and Chen et al., the authors show that glutamatergic neurons in LH are disinhibited by accumbens core D1 MSNs acting on LH GABA neurons to facilitate morphine withdrawal memory retrieval. To achieve this, the authors use a combination of IHC and FISH, optogenetics, chemogenetics, and patch-clamp recordings. Overall the authors present a complete suite of experimen…	N/A		50	70	75	80	30	70			80	75	60	40	20	70			65	72.5	67.5	60	25	70
51	https://www.nature.com/articles/s41467-022-35719-y			2022-07-20	2022-12-16	149	x				U		Noelle A. Sterling	F	Seonhee Kim	F	An entosis-like process induces mitotic disruption in Pals1 microcephaly pathogenesis	Entosis is cell cannibalism utilized by tumor cells to engulf live neighboring cells for pro- or anti-tumorigenic purposes. It is unknown whether this extraordinary cellular event can be pathogenic in other diseases such as microcephaly, a condition characterized by a smaller than normal brain at birth. We find that mice mutant for the human microcephaly-causing gene Pals1, which exhibit diminish…		5	x	In Sterling et al the authors show evidence that entosis occurs in the cortices of Pals1-mutant mice that display microcephaly. Dividing cells are shown to contain other cells within their cytoplasm, in a manner inhibited by treatment with the ROCK inhibitor Y-27632, a known inhibitor of entosis. Entotic structures are shown to correlate with defects in cytokinesis timing and chromosome segregati…	Sterling et al. demonstrate the phenomenon of an entosis-like process in the apical progenitors of conditional Pals1 knockout brains, and link this to the microcephaly phenotype caused by mutations in this gene. They show evidence that these cell-in-cell structures lead to disruption of mitosis and cytokinesis, and they show elevated ROCK activity is involved. Remarkably, they go on to find that …	N/A	N/A		80	70	90	90					80	70	90	80					80	70	90	85
53	https://www.nature.com/articles/s41467-022-35658-8			2022-03-04	2022-12-15	286			x		E	70	Ellen Boven	F	Rui Ponte Costa	M	Cerebro-cerebellar networks facilitate learning through feedback decoupling	Behavioural feedback is critical for learning in the cerebral cortex. However, such feedback is often not readily available. How the cerebral cortex learns efficiently despite the sparse nature of feedback remains unclear. Inspired by recent deep learning algorithms, we introduce a systems-level computational model of cerebro-cerebellar interactions. In this model a cerebral recurrent network rec…		4	x	This manuscript introduces a model of cerebro-cerebellar networks, whose critical component is a feedback decoupling element. The model improves learning e.g. in a simple sensorimotor task in a cerebro-cerebellar recurrent neural network (ccRNN) configuration as opposed to a mere cerebral RNN (cRNN). Quite honestly, I am a bit puzzled by this work. There are three main limitations that truly limi…	In the present paper, Boven et al. suggest the idea that the main function of the cerebellar circuit is to provide a synthetic or simulated gradient (ie. feedback signal) to the neocortex, which promotes learning if feedback is sparse or only available at the end of the movement. Through a series of simulation studies, the authors explore some tasks where these advantages are present and present …	N/A	N/A		-40	20	60	70					-30	40	60	80					-35	30	60	75
54	https://www.nature.com/articles/s41467-022-35574-x			2022-02-25	2022-12-12	290		x			A		Ee Shan Liau		Jun-An Chen	M	Single-cell transcriptomic analysis reveals diversity within mammalian spinal motor neurons	Spinal motor neurons (MNs) integrate sensory stimuli and brain commands to generate movements. In vertebrates, the molecular identities of the cardinal MN types such as those innervating limb versus trunk muscles are well elucidated. Yet the identities of finer subtypes within these cell populations that innervate individual muscle groups remain enigmatic. Here we investigate heterogeneity in mou…		1	x	Here the authors use single-cell RNA sequencing to describe the diversity of spinal motor neurons. They sorted motor neurons from the spinal cord using an Mnx1-GFP transgenic animal. Their analysis finds two novel MN subtypes, as well as novel heterogeneity within the LMC and MMC subtypes. Their findings also suggest that these subpopulations are present in multiple species. Although the manuscri…	Liau et al. characterize the diversity of motor neuron subtypes in the embryonic spinal cord. To do so, they isolate motor neurons from E13.5 Mnx1-GFP embryos and perform single cell RNA sequencing using the 10X approach. Using bioinformatic analysis the authors first reveal previously unrecognized motor neuron subtypes and provide experimental evidence for their existence in the embryo. They sub…	This detailed single cell transcriptomic description of embryonic motor neurons by Liau et al. is compelling evidence for the molecular diversity of motor neuron subtypes whose existence has long been hypothesized but for which specific markers were for the most part unknown. In this study, the authors perform single cell sequencing of Mnx1-GFP positive motor neurons (MNs) of 2 regions of the dev…	N/A		50	80	90	90	70	80			50	80	80	90	90	80			50	80	85	90	80	80
58	https://www.nature.com/articles/s41467-022-35536-3			2021-09-04	2022-12-09	461	x				U	74.5	Madison N. Wilson	F	Duygu Kuzum	F	Multimodal monitoring of human cortical organoids implanted in mice reveal functional connection with visual cortex	Human cortical organoids, three-dimensional neuronal cultures, are emerging as powerful tools to study brain development and dysfunction. However, whether organoids can functionally connect to a sensory network in vivo has yet to be demonstrated. Here, we combine transparent microelectrode arrays and two-photon imaging for longitudinal, multimodal monitoring of human cortical organoids transplant…		2	x	In this paper, Wilson and colleague conducted an experiment based on transparent graphene microelectrode arrays and two-photon imaging for longitudinal, multimodal monitoring of human organoids transplanted into the mouse cortex. The transparency of graphene microelectrodes allows visual and optical in vivo inspection of the transplanted organoid and the surrounding cortex throughout the chronic …	The paper by Wilson et al., describes new method combining transplantation of cortical organoids derived from human iPSC and transparent graphene microelectrodes. The study shows that grafted organoids reveal that periphral stimulation evokes electrophysiological responses in the organoids. Although, this studies technically very sound and advances our capacity to monitor activity of transplanted…	x	N/A		60	75	-30	30					50	80	-60	10					55	77.5	-45	20
59	https://www.nature.com/articles/s41467-022-35601-x			2022-07-08	2022-12-13	158	x				U	46.7	Miguel Skirzewski	M	Timothy J. Bussey	M	Continuous cholinergic-dopaminergic updating in the nucleus accumbens underlies approaches to reward-predicting cues	The ability to learn Pavlovian associations from environmental cues predicting positive outcomes is critical for survival, motivating adaptive behaviours. This cued-motivated behaviour depends on the nucleus accumbens (NAc). NAc output activity mediated by spiny projecting neurons (SPNs) is regulated by dopamine, but also by cholinergic interneurons (CINs), which can release acetylcholine and glu…		2	x	This interesting study demonstrates the close interaction between the striatal cholinergic interneurons and dopamine release in the mouse nucleus acumbens, during a autoshaping task performance of Pavlovian paradigm. Even the hypothesis of the DA-ACh relation is not new, it is very remarkable that this investigation dissects the action of acetylcholine and glutamate along the different phases of …	This manuscript by Skirzewski and colleagues focuses on the cholinergic-dopaminergic interaction in the NAc, and the role of acetylcholine and glutamate release from striatal cholinergic interneurons in a Pavlovian task. First, the authors designed and validated a touchscreen-based autoshaping task. They further selectively lesioned ACh release or glutamate release from cholinergic interneurons a…	Skirzewski and colleagues investigate the role of acetylcholine signaling in the nucleus accumbens in the development of Pavlovian conditioned approach behavior, dopamine signaling, and D1 and D2 neuron activity. Across a number of studies, they demonstrate that normal acetylcholine signaling from cholinergic interneurons is necessary for the development of cue-reward association underlying Pavlo…	N/A		70	90	40	60	90	100			70	90	50	80	80	100			70	90	45	70	85	100
60	https://www.nature.com/articles/s41467-022-35620-8			2022-01-04	2022-12-13	343			x		E	95	Kirsten Bohmbach	F	Christian Henneberger	M	An astrocytic signaling loop for frequency-dependent control of dendritic integration and spatial learning	Dendrites of hippocampal CA1 pyramidal cells amplify clustered glutamatergic input by activation of voltage-gated sodium channels and N-methyl-D-aspartate receptors (NMDARs). NMDAR activity depends on the presence of NMDAR co-agonists such as D-serine, but how co-agonists influence dendritic integration is not well understood. Using combinations of whole-cell patch clamp, iontophoretic glutamate …		1	x	The paper by Bohmbach et al. explores the role for hippocampal astrocytes and astrocyte-derived D-Serine in the integration of glutamatergic activity in the dendrites of pyramidal neurons. By combining the whole-cell electrophysiological recordings, two-photon microscopy, and astrocytespecific genetic manipulations, Authors provide several lines of evidence that extracellular level of NMDAR co-ag…	This manuscript by Bohmbach et al investigates the role of astrocytes on dendritic integration in the hippocampus. They show that the threshold and amplitude of dendritic spikes are regulated by both D-serine and (endo)cannabinoids. Interestingly, antidromic stimulation of pyramidal neuron´s axons in the alveus showed a frequency-dependent regulation of dendritic spikes also mediated by D-serine …	Using two-photon Ca2+ imaging, the authors explored effect of astrocyte activation on the threshold and amplitude of dendritic spikes of hippocampal CA1 pyramidal neurons induced by iontophoretic application of glutamate. They found that antidromic stimulation of CA1 pyramidal neuronal axons, which induced Ca2+ elevation in astrocytes, frequency dependently enhanced dendritic spikes, a response b…	N/A		80	80	80	70	80	80			70	85	80	80	50	80			75	82.5	80	75	65	80
61	https://www.nature.com/articles/s41467-022-35488-8			2021-09-14	2022-12-06	448			x		E	64.6	Jasper H. Fabius	M	Alessio Fracasso	M	Topographic organization of eye-position dependent gain fields in human visual cortex	The ability to move has introduced animals with the problem of sensory ambiguity: the position of an external stimulus could change over time because the stimulus moved, or because the animal moved its receptors. This ambiguity can be resolved with a change in neural response gain as a function of receptor orientation. Here, we developed an encoding model to capture gain modulation of visual resp…		3	x	The authors conducted three human fMRI experiments with and without saccadic eye movements over moving or static-flickering bar-graph stimuli in order to systematically model the influence of eye positions on the fMRI responses to visual bar stimuli. Using extensive modelling of population receptive fields (pRFs) as well as population eye position gain fields (pEGFs) the authors show that eye-pos…	In species that move their eyes, establishing spatial representations requires integrating the visual signals impinging onto the retina with information about the direction of gaze. At the neural level, a way in which this process is believed to take place is via modulation of visual responses by eye position. Such a modulation has been observed at multiple stages of the visual hierarchy and desc…	N/A	N/A		80	80	20	80					80	70	20	50					80	75	20	65
62	https://www.nature.com/articles/s41467-022-35558-x			2022-02-15	2022-12-10	298			x		E		Manuela Friedrich	F	Angela D. Friederici	F	Memory for nonadjacent dependencies in the first year of life and its relation to sleep	Grammar learning requires memory for dependencies between nonadjacent elements in speech. Immediate learning of nonadjacent dependencies has been observed in very young infants, but their memory of such dependencies has remained unexplored. Here we used event-related potentials to investigate whether 6- to 8-month-olds retain nonadjacent dependencies and if sleep after learning affects this memor…		3	x	Existing behavioural evidence suggests that sleep modules memory for non-adjacent dependencies in 15 month olds. However, this is yet to be examined in younger infants. Thus, the present study utilises event-related potentials (ERPs) to assess the learning and memory of NADs in 6- to 8-montholds, as well as recording naps with polysomnography during the time that elapsed between learning and test…	This manuscript reports the results of an experiment (N = 85) on post-encoding sleep-effects on 6- to 8-month-old infants’ memory in the context of language learning. In contrast to earlier findings on the role of sleep for lexical-semantic learning, there was no effect of sleep on retention (and generalization) of nonadjacent dependencies (NADs) – both infants who napped and who stayed awake dur…	The current manuscript reports the result of one ERP study examine whether infants ages 6- to 8- months retain memory for grammar, and whether post-encoding sleep affects the nature of memory representations. There is a lot to like about the manuscript including the questions beings addressed, the experimental design which is elegant and well controlled, and the focus on neural mechanisms. The sc…	N/A		60	70	70	80	70	50			70	90	60	80	60	70			65	80	65	80	65	60
63	https://www.nature.com/articles/s41467-022-35383-2			2021-03-22	2022-11-30	618	x				U	39	Adam Institoris	M	Grant R. Gordon	M	Astrocytes amplify neurovascular coupling to sustained activation of neocortex in awake mice	Functional hyperemia occurs when enhanced neuronal activity signals to increase local cerebral blood flow (CBF) to satisfy regional energy demand. Ca2+ elevation in astrocytes can drive arteriole dilation to increase CBF, yet affirmative evidence for the necessity of astrocytes in functional hyperemia in vivo is lacking. In awake mice, we discovered that functional hyperemia is bimodal with a dis…		1	x	This new paper by Grant Gordon's group describes the results of an impressive series of experimental studies aimed to investigate the functional significance of astroglial Ca2+ signals induced by increases in local neuronal activity. In particular, the authors re-evaluated the role of astroglial Ca2+ elevations in mediating activity-dependent dilations of cortical penetrating arterioles (function…	The paper “Sustained activation of awake mouse neocortex unleashes an astrocyte-mediated amplification of neurovascular coupling” applies a variety of challenging approaches to address the important and unresolved question of astrocytic involvement in neurovascular coupling. Over many years this cell type has been a common suspect in this regulation, due to its morphology that links synapses to v…	The manuscript by Institoris et al tackles an important question in the field of neurovascular coupling: what is the role of astrocytes in triggering or modulating vascular responses? Most studies have used correlations between blood flow changes and astrocyte signals to infer or discard any role for these cells. Initially, mostly somatic signals were measured for technical reasons, resulting in …	N/A		90	85	80	70	50	70			80	80	50	80	10	50			85	82.5	65	75	30	60
64	https://www.nature.com/articles/s41467-022-35395-y			2022-03-31	2022-11-29	243			x		E		Alessandro Barri	M	David DiGregorio	M	Synaptic basis of a sub-second representation of time in a neural circuit model	Temporal sequences of neural activity are essential for driving well-timed behaviors, but the underlying cellular and circuit mechanisms remain elusive. We leveraged the well-defined architecture of the cerebellum, a brain region known to support temporally precise actions, to explore theoretically whether the experimentally observed diversity of short-term synaptic plasticity (STP) at the input …		4	x	The basic idea of this manuscript is that a heterogeneity of synaptic time constants---arising from a variety of biophysical mechanisms---providing input to cerebellar granule cells are sufficient to enable granule cells to exhibit temporal basis functions. The computational model is quantitatively constrainted by a large body of empirical data. To my knowledge, this is the first paper drawing ou…	Barri and colleagues develop a biologically-based model of how the cerebellum may represent time. Previous work by this lab has characterized and quantified short-term synaptic plasticity (STP) at the MFGr synapse. Here a feed-forward model of the cerebellar circuitry MF-Gr-PC is developed in which biologically derived STP at the MF-Gr synapses imposes exponentially decaying (for the most part) a…	N/A	N/A		70	80	70	70					60	70	50	70					65	75	60	70
65	https://www.nature.com/articles/s41467-022-35346-7			2021-11-09	2022-11-30	386		x			A	81.4	Hiroyuki Kawai	M	Shuji Kaneko	M	Median raphe serotonergic neurons projecting to the interpeduncular nucleus control preference and aversion	Appropriate processing of reward and aversive information is essential for survival. Although a critical role of serotonergic neurons in the dorsal raphe nucleus (DRN) in reward processing has been shown, the lack of rewarding effects with selective serotonin reuptake inhibitors (SSRIs) implies the presence of a discrete serotonergic system playing an opposite role to the DRN in the processing of…		2	x	The brain serotonin system modulates numerous behavioral processes. Serotonin neurons in the dorsal raphe nucleus attract much attention for their roles in reward processing. Although the median raphe nucleus (MRN) is also a major source of serotonin to the forebrain, it has remained elusive whether and how MRN serotonin neurons contribute to reward processing. Previous studies on the MRN often i…	In this study, Kawai and colleagues show the role of MRN in processing reward and aversive information. They find that 1. MRN serotonergic neurons increase and decrease their activity by an aversive stimulus tail pinch and an appetitive stimulus sucrose solution, respectively. 2. Optogenetic excitation and inhibition of MRN serotonergic neurons induce aversive effect measured by the conditioned p…	N/A	N/A		10	70	50	70					10	70	50	80					10	70	50	75
66	https://www.nature.com/articles/s41467-022-35190-9			2022-07-11	2022-11-16	128		x			A		Masashi Tanimoto	M	Shin-ichi Higashijima	M	Tiltable objective microscope visualizes selectivity for head motion direction and dynamics in zebrafish vestibular system	Spatio-temporal information about head orientation and movement is fundamental to the sense of balance and motion. Hair cells (HCs) in otolith organs of the vestibular system transduce linear acceleration, including head tilt and vibration. Here, we build a tiltable objective microscope in which an objective lens and specimen tilt together. With in vivo Ca2+ imaging of all utricular HCs and gangl…		2	x	The manuscript by Tanimoto is an exemplary piece of work using a novel optical apparatus and clever stimulus paradigms to address a long-standing question in the field: how do hair cells (and sensory afferents) respond during head motion. Admittedly, given that the mechanisms of hair cell force transduction are well established, I think that there is a strong prediction for how these cells should…	The authors design and build a spinning disc confocal microscope in which the stage can be rotated or shaken to produce vestibular stimuli during calcium imaging. Using this microscope they describe responses (to static and vibrational pitch and roll stimuli) in utricular hair cells that are expected based on previous descriptions of the cells’ anatomical orientations. They also show that extrast…	This study is a beautiful tour de force to image the response of the inner ear hair cells and VGN to linear acceleration. I commend the authors for gorgeous and clear figures, as well as thorough characterization of their system. Overall, the manuscript is well written and the results convincing, the authors clearly state the limitations and provide adequate discussion of most issues. I have some…	N/A		90	80	30	80	90	80			90	100	50	80	80	90			90	90	40	80	85	85
67	https://www.nature.com/articles/s41467-022-35373-4			2022-05-30	2022-11-29	183			x		E	54.1	Rodrigo G. Fernandez Lahore	M	Peter Hegemann	M	Calcium-permeable channelrhodopsins for the photocontrol of calcium signalling	Channelrhodopsins are light-gated ion channels used to control excitability of designated cells in large networks with high spatiotemporal resolution. While ChRs selective for H+, Na+, K+ and anions have been discovered or engineered, Ca2+-selective ChRs have not been reported to date. Here, we analyse ChRs and mutant derivatives with regard to their Ca2+ permeability and improve their Ca2+ affin…		1	x	Aiming for ChR variants with higher calcium selectivity the authors combined mutations, which have been implicated in increasing CrChR2 Ca2+-conductance. The comparison of different CrChR2 combinatory mutants by patch-clamp experiments yielded the calcium-permeable CrChR2 quadrupole mutant CapChR1. The transfer of the corresponding set of mutations to CoChR, which the authors selected based on a …	The manuscript “Channelrhodopsin-based calcium actuators for the photocontrol of calcium signalling” by Fernandez Lahore et al. is a very important work on the rational design of novel Channelrhodopsins (ChRs) that allow selective conducting of Ca2+ ions by illumination. In fact, researchers from various disciplines applying optogenetic tools including myself are awaiting such ChR2 desperately be…	The authors measured Ca2+ permeability of 12 different published CCRs with high cation conductance to choose the best to start with to increase permeability by mutagenesis. CoChR was the most permeable (see Fig 1D) and the authors chose to mutate wild-type CoChR along with the well characterized and most commonly used CCR, CrChR2. The most conductive mutant the authors made was the quadruple muta…	N/A		0	70	80	90	60	80			0	100	85	80	60	70			0	85	82.5	85	60	75
69	https://www.nature.com/articles/s41467-022-35119-2			2022-03-13	2022-11-17	249		x			A		Masanori Nomoto	M	Kaoru Inokuchi	M	Hippocampus as a sorter and reverberatory integrator of sensory inputs	The hippocampus must be capable of sorting and integrating multiple sensory inputs separately but simultaneously. However, it remains to be elucidated how the hippocampus executes these processes simultaneously during learning. Here we found that synchrony between conditioned stimulus (CS)-, unconditioned stimulus (US)- and future retrieval-responsible cells occurs in the CA1 during the reverbera…		2	x	Nomoto et al. showed that CA3-NMDA receptor (NR1) deficit mice and mice with CA3 ontogenetically silenced showed impaired long-term cued-fear memory. Further, calcium events of conditioning-stimuli (CS) and test-CS responsible cells in CA1 are more activated after presenting unconditioned stimuli (US) during conditioning sessions in wild-type than CA3 NR deficit mice. After the US presentation, t…	The theoretical models of hippocampal area CA3 postulate that reverberatory activity caused by massive recurrent networks among CA3 cells could serve as an associator or integrator of multiple sensory inputs. However, Lovett-Barron et al (2014) suggested that the temporoammonic pathway from entorhinal cortex to CA1 prevents association between condition stimuli (CS) and unconditioned stimuli (US)…	N/A	N/A		60	70	10	90					80	60	50	80					70	65	30	85
71	https://www.nature.com/articles/s41467-022-35324-z			2022-02-24	2022-11-28	277			x		E	32.9	Dennis Vettkötter	M	Alexander Gottschalk	M	Rapid and reversible optogenetic silencing of synaptic transmission by clustering of synaptic vesicles	Acutely silencing specific neurons informs about their functional roles in circuits and behavior. Existing optogenetic silencers include ion pumps, channels, metabotropic receptors, and tools that damage the neurotransmitter release machinery. While the former hyperpolarize the cell, alter ionic gradients or cellular biochemistry, the latter allow only slow recovery, requiring de novo synthesis. …		1	x	In their manuscript, Vettkötter et al. describe the development and application of a new optogenetic tool “optoSynC” that enables neuronal inhibition via light induced clustering of synaptic vesicles. The method relies on homooligomerization of AtCRY2, a blue light photoreceptor, targeted to vesicles using fusion to synaptogyrin (SNG-1). The authors proof the functionality by various methods in t…	The manuscript by Vettkotter et al. introduces optoSynC, a new optogenetic tool to suppress neuronal activity. The presented strategy is based on photoinduced homo-oligomerization of cryptochrome-2 (CRY2), which in turn is fused to the synaptic vesicle (SV) protein Synaptogyrin (SNG-1). This setting enables light-triggered SV clustering, resulting in reduced neurotransmitter release from the pres…	In this study, the authors report a novel and a much needed optogenetic approach for rapid and reversible silencing of target neurons without affecting neural polarization. The method relies on the light-induced oligomerization of cryptochrome CRY2 which leads to clustering and sequestration of synaptic vesicles. While the silencing is limited in its effectiveness (e.g., some analyses showed less…	N/A		70	75	70	90	70	80			50	75	70	80	60	80			60	75	70	85	65	80
73	https://www.nature.com/articles/s41467-022-35540-7			2021-07-23	2022-12-09	504			x		E	67.7	Wonok Kang		Sung-Min Park	M	Closed-loop direct control of seizure focus in a rodent model of temporal lobe epilepsy via localized electric fields applied sequentially	Direct electrical stimulation of the seizure focus can achieve the early termination of epileptic oscillations. However, direct intervention of the hippocampus, the most prevalent seizure focus in temporal lobe epilepsy is thought to be not practicable due to its large size and elongated shape. Here, in a rat model, we report a sequential narrow-field stimulation method for terminating seizures, …		5	x	In this manuscript Kang and colleagues apply a closed loop neurostimulation strategy to disrupt acute seizures triggered by kainic acid. Conceptually this manuscript is built on a now long, and growing, literature on the use of closed loop neuromodulation strategies. While the data presented appear sound, I have several problems with the over all design and some results. First, the authors are ex…	This manuscript reported a sequential narrow-field (SNF) stimulation method by applying sequential electrical stimulation on pairs of electrodes implanted in the hippocampus to control the localization of electric field. The authors compared the effects of open loop DBS, unilateral and bilateral closed loop wild field stimulation and SNF stimulation on the inhibition of seizure activities on an a…	In this manuscript, Kang et al. investigate closed-loop control of temporal lobe seizures using a sequential narrow-field (SNF) stimulation method. This method is proposed to decrease the potential side effects of stimulation by reducing the region of brain tissue under the influence of the stimulation without compromising seizure termination efficacy. The motivation and concept for the work are …	N/A		-50	20	0	70	-10	10			-70	10	10	70	-30	60			-60	15	5	70	-20	35
74	https://www.nature.com/articles/s41467-022-34938-7			2021-05-24	2022-11-10	535	x				U	74.5	Timothy Tadros	M	Maxim Bazhenov	M	Sleep-like unsupervised replay reduces catastrophic forgetting in artificial neural networks	Artificial neural networks are known to suffer from catastrophic forgetting: when learning multiple tasks sequentially, they perform well on the most recent task at the expense of previously learned tasks. In the brain, sleep is known to play an important role in incremental learning by replaying recent and old conflicting memory traces. Here we tested the hypothesis that implementing a sleep-lik…		4	x	In this study, a previously developed sleep replay algorithm (SRA) is applied to the incremental training of deep neural networks (DNNs). It is demonstrated that SRA reduces catastrophic forgetting, and some insights are provided as to why SRA might be doing so. Catastrophic forgetting is an important problem and a ‘hot topic’ in deep learning, and leveraging insights from the brain to address th…	In this work, Tadros et al. demonstrated that introducing unsupervised learning mediated by spontaneous activity reply (SRA) can help reduce catastrophic forgetting in artificial network networks (ANNs). Improved results obtained by the proposed method were shown in a number of continual learning tasks. Possible underlying mechanisms were also explored. It was found that SRA reduced representatio…	N/A	N/A		0	60	60	80					10	60	70	60					5	60	65	70
75	https://www.nature.com/articles/s41467-022-35474-0			2021-11-07	2022-12-05	393		x			A		Tao Jia		Chunyi Zhou	M	A nigro–subthalamo–parabrachial pathway modulates pain-like behaviors	The basal ganglia including the subthalamic nucleus (STN) and substantia nigra pars reticulata (SNr) are involved in pain-related responses, but how they regulate pain processing remains unknown. Here, we identify a pathway, consisting of GABAergic neurons in the SNr (SNrGABA) and glutamatergic neurons in the STN (STNGlu) and the lateral parabrachial nucleus (LPBGlu), that modulates acute and per…		2	x	Pain is a common source of distress and lack optimal treatments. Recent studies have revealed new nociceptive circuits outside the classical pain pathways able to modulate nociceptive processing. The general idea of this manuscript is to test whether these circuits could represent potential therapeutic targets for effective treatment of chronic pain. The clinical impact of this work is crucial as…	In this manuscript titled “A nigro–subthalamo–parabrachial pathway modulates 1 painlike behaviors”, the authors explored the involvement of substantia nigra pars reticulata (SNr)- subthalamic nucleus (STN)- lateral parabrachial nucleus (LPB) pathway in acute mice inflammation and neuropathic pain models. The authors proved that STNGlu neurons are activated after injury and can be activated by per…	The manuscript describes a hitherto uncharacterized pathway that may regulate pain perception, from the subthalamic nucleus (STN) to the parabrachial nucleus (PB). This complements the previous characterized reciprocal pathway from PB to STN (which the authors, surprisingly, do not explicitly discuss). The authors apply an impressive array of behavioral, electrophysiological and functional imagin…	N/A		40	80	20	80	60	70			60	50	50	70	30	50			50	65	35	75	45	60
79	https://www.nature.com/articles/s41467-022-35384-1			2022-02-08	2022-11-25	290	x				U	90.6	Marco D. Carpenter	M	Elizabeth A. Heller	F	Cell-type specific profiling of histone post-translational modifications in the adult mouse striatum	Epigenetic gene regulation in the heterogeneous brain remains challenging to decipher with current strategies. Bulk tissue analysis from pooled subjects reflects the average of cell-type specific changes across cell-types and individuals, which obscures causal relationships between epigenetic modifications, regulation of gene expression, and complex pathology. To address these limitations, we opt…		1	x	Carpenter et al develop an assay to efficiently measure histone modifications in labeled populations of cells by combining INTACT, CUT&RUN-Seq, and ChIP-Seq into an experimental procedure called ICuRuS. The apply this technique to measure H3K4me3 and H3K27me3 in subpopulations of medium spiny neurons. This new experimental technique has the potential to be applied much more broadly and is of inte…	The study by Carpenter et al. combined cell-type specific nuclei isolation by the INTACT method with CUT&RUN in order to profile active (H3K4me3) and repressive (H3K27me3) histone modifications in two medium spiny neuron (MSN) subtypes of the mouse striatum, namely Adenosine 2a Receptor (A2a)- expressing and Dopamine Receptor D1 (D1)-expressing neurons. The authors first test the efficiency of th…	This manuscript by Carpenter, Fischer, Zhang, et al describes a new protocol using INTACT and CUT&RUN (CnR) methods, together ICuRUS, to profile cell-type specific histone modifications in individual mouse brain tissue samples. Using these combined methods overcomes the limitations of other neuro-epigenomic techniques such as ChIP-Seq, which cannot perform cell-type specific analysis or incorpora…	N/A		60	90	60	80	60	70			50	70	70	80	70	85			55	80	65	80	65	77.5
80	https://www.nature.com/articles/s41467-022-35361-8			2022-03-05	2022-11-29	269	x				U	45.6	Zhouhuan Xi		Leah C. Byrne	F	Gene augmentation prevents retinal degeneration in a CRISPR/Cas9-based mouse model of PRPF31 retinitis pigmentosa	Mutations in PRPF31 cause autosomal dominant retinitis pigmentosa, an untreatable form of blindness. Gene therapy is a promising treatment for PRPF31-retinitis pigmentosa, however, there are currently no suitable animal models in which to develop AAV-mediated gene augmentation. Here we establish Prpf31 mutant mouse models using AAV-mediated CRISPR/Cas9 knockout, and characterize the resulting ret…		5	x	Dr. Byrne and colleagues in this study developed an animal model of one of the more common forms of retinitis pigmentosa (RP) – a form caused by PRPF31 mutations. There was an engineered mouse made several years ago, but its phenotype was extremely mild (and didn’t appear until old age) and so the model may not be relevant. PRPF31 causes autosomal dominant disease but it may do so by haploinsuffi…	Given the importance of PRPF31 and its ubiquitous involvement in splicing machinery, creating retinal disease models with non-lethal knockouts that degenerate in a timely and desirable manner has been particularly difficult. Here, the researchers present a CRISPRmediated KO of PRPF31 demonstrated throughout multiple layers of the retina and across several injection routes, resulting in both morph…	x	N/A		60	90	80	70					70	80	80	70					65	85	80	70
81	https://www.nature.com/articles/s41467-022-34624-8			2022-03-16	2022-11-01	230			x		E	95	Antoine Coutrot	M	Hugo Spiers	M	Reported sleep duration reveals segmentation of the adult life-course into three phases	Classically the human life-course is characterized by youth, middle age and old age. A wide range of biological, health and cognitive functions vary across this life-course. Here, using reported sleep duration from 730,187 participants across 63 countries, we find three distinct phases in the adult human life-course: early adulthood (19-33yrs), mid-adulthood (34-53yrs), and late adulthood (54+yrs…		3	x	This is a very interesting article, I commend the authors for their work. My main comment after reviewing the manuscript relates to the causal language used throughout the manuscript. The authors frame the discussion as if self reported sleep duration is per se causing the cognitive impairment, rather than being a proxy measure or barometer of their overall sleep health. In page 9, the authors di…	This is a very unique paper examining reported self-reported sleep duration in a large multi-national sample across the adult life-span. Using strong statistical modeling, the paper finds three consistent age periods related to sleep duration across cultures, including a young adult period, transition at 34 and another transition after 53 years. This study also uniquely utilizes a well-validated …	In the interesting study by Coutrot and colleagues, the authors analyzed subjective sleep duration from a large cohort of participants across 63 countries and they identified three distinct phases in the adult human life course; within the late adulthood (> 54 yrs to 70 yrs) the authors identified an inverted U-shape regulation between sleep duration and cognitive performance as measured by spati…	N/A		50	80	70	70	50	80			50	80	60	70	60	80			50	80	65	70	55	80
83	https://www.nature.com/articles/s41467-022-35406-y			2021-11-15	2022-12-01	381	x				U	85.1	Jung Ho Hyun	M	Hyung-Bae Kwon	M	Tagging active neurons by soma-targeted Cal-Light	Verifying causal effects of neural circuits is essential for proving a direct circuit-behavior relationship. However, techniques for tagging only active neurons with high spatiotemporal precision remain at the beginning stages. Here we develop the soma-targeted Cal-Light (ST-Cal-Light) which selectively converts somatic calcium rise triggered by action potentials into gene expression. Such modifi…		1	x	Building on the elegant gene expression system (Cal-Light) that was previously reported by the same group (Lee and Kwon, Nat Biotech. 2017), Hyun and Kwon further refined the system by engineering the sensor to be soma-targeted. Briefly, this system serves as a coincidence detector of high calcium level and light activation. At high calcium, the membrane tethered sensor recruits a viral protease,…	As an upgrade of their original Cal-Light version, the authors successfully designed the somatargeted Cal-Light (ST-Cal-Light) and generated a conditional ST-Cal-Light knock-in mouse to allow higher signal-to-noise ratio and an ease to be implemented according to diverse experimental needs. The cre-dependent ST-Cal-Light mouse will enable cell-type specific activitydependent labeling, which is ve…	1) The authors have a previously published Cal-light system to tag active neurons. The current manuscript refines this further. 2) The authors claim that the Cal-light system is superior to Cfos-expression- driven activity reporter mice. This claim is grounded in a solid and logical premise. However, the authors did not directly compare the two systems to demonstrate the superiority of the Cal-li…	N/A		80	60	50	80	30	70			50	75	40	80	20	80			65	67.5	45	80	25	75
84	https://www.nature.com/articles/s41467-022-35423-x			2022-02-04	2022-12-02	301	x				U	89	Frank R. Wendt	M	Renato Polimanti	M	Phenome-wide association study of loci harboring de novo tandem repeat mutations in UK Biobank exomes	When present in coding regions, tandem repeats (TRs) may have large effects on protein structure and function contributing to health and disease. We use a family-based design to identify de novo TRs and assess their impact at the population level in 148,607 European ancestry participants from the UK Biobank. The 427 loci with de novo TR mutations are enriched for targets of microRNA-184 (21.1-fol…		5	x	This manuscript describes a phenome-wide association study (PWAS) focusing on tandem repeats (TRs) and in particular de novo mutations. It uses the rich resource of whole-exome sequencing datasets from the UK Biobank. The work is novel and important. The manuscript is generally well written. I have suggestions below for improvements to the manuscript. 1. The final analysis was focused on 39 trios…	The study by Wendt et al analyses exome sequencing data from the UK Biobank to perform a phenomewide association analysis of tandem repeats (TR). The authors first identify de novo TR mutations in 39 trios, and then perform a number of TR association analyses for these de novo TR loci in the wider UKB dataset. These association analyses include gene set enrichment tests, using gene ontologies fro…	This interesting article by Wendt, Pathak, and Polimanti examine de novo tandem repeat mutations within the Whole Exome Sequencing Data of the UK Biobank. From 40 trios, the authors identify 1031 de novo tandem repeat mutations within the probands of 34 European-descent trios. These repeats were annotated, and a phenome-wide association study was conducted across 1844 UK Biobank phenotypes. The g…	N/A		50	75	50	80	30	70			70	85	50	80	50	80			60	80	50	80	40	75
86	https://www.nature.com/articles/s41467-022-35417-9			2021-07-06	2022-12-02	514	x				U	53.7	Sarah Perry	F	Dion Dickman	M	A glutamate receptor C-tail recruits CaMKII to suppress retrograde homeostatic signaling	Presynaptic homeostatic plasticity (PHP) adaptively enhances neurotransmitter release following diminished postsynaptic glutamate receptor (GluR) functionality to maintain synaptic strength. While much is known about PHP expression mechanisms, postsynaptic induction remains enigmatic. For over 20 years, diminished postsynaptic Ca2+ influx was hypothesized to reduce CaMKII activity and enable retr…		1	x	A Glutamate receptor C-tail Recruits CaMKII to suppress Retrograde Homeostatic Signaling. In the current study, Perry et al. cleverly interrogated the postsynaptic mechanisms hypothesized to initiate retrograde PHP signaling at the Drosophila NMJ. To examine the roles of GluRIIA, postsynaptic Ca2+ and CamKII activity in retrograde PHP induction the authors developed specific antibodies selective …	Presynaptic homeostatic plasticity is thought to be important for neuronal function. Here Perry et al report that the c-tail of GluRIIA is critical for recruiting activated CaMKII, which mediates PHP signaling. Some results of this manuscript, especially the part showing that c-tail of GluRIIA is important for docking CaMKII, is interesting, and the related experiments were well designed and soli…	N/A	N/A		80	80	50	50					80	80	50	60					80	80	50	55
87	https://www.nature.com/articles/s41467-022-35355-6			2022-02-25	2022-11-30	278		x			A		Feng Xiong		Wen-Bo Zeng	M	An HSV-1-H129 amplicon tracer system for rapid and efficient monosynaptic anterograde neural circuit tracing	Monosynaptic viral tracers are essential tools for dissecting neuronal connectomes and for targeted delivery of molecular sensors and effectors. Viral toxicity and complex multi-injection protocols are major limiting application barriers. To overcome these barriers, we developed an anterograde monosynaptic H129Amp tracer system based on HSV-1 strain H129. The H129Amp tracer system consists of two…		2	x	Feng Xiong et al present a new experimental approach for anterograde neurotracing with HSV129 vectors that reduces the experimental timeline from several weeks to under one week. The authors claim that their amplicon helper virus system overcomes several of the problems associated with existing approaches of anterograde labeling that utilize HSV namely low labeling intensity and high toxicity in …	This manuscript describes the development and testing of several new reagents for anterograde trans-neuronal tracing. While the results presented clearly show that the new reagents will have utility for experiments that are not possible with other existing tracers, there are many concerns about various claims that are made without experimental support, and/or potential limitations or labeling art…	In this study, Xiong et al. developed a novel HSV-1-H129 amplicon tracer system as a monosynaptic viral tracer for dissecting neuronal connectomes and targeted delivery of molecular sensors and effectors. The improvements of the H129Amp tracer system shorten the experiment duration from 28-days to 5-days for fast-monosynaptic tracing and minimize toxicity in the postsynaptic neurons. The idea beh…	N/A		50	80	-30	50	60	70			60	80	50	75	50	50			55	80	10	62.5	55	60
88	https://www.nature.com/articles/s41467-022-35342-x			2022-03-01	2022-11-30	274		x			A	81.5	Xiaocen Fan		Xing Liu	M	Noradrenergic signaling mediates cortical early tagging and storage of remote memory	The neocortical prefrontal memory engram generated during initial learning is critical for remote episodic memory storage, however, the nature of early cortical tagging remains unknown. Here we found that in mice, increased norepinephrine (NE) release from the locus coeruleus (LC) to the medial prefrontal cortex (mPFC) during contextual fear conditioning (CFC) was critical for engram tagging and …		2	x	The MS describes a number of studies involving combinatorial/conditional viral vectors + constructs. I counted >10 employed in the first two figures alone. The names of the genes/promoters, etc are not always commonly employed nor are they identified anywhere in the MS or supplemental materials. Further the molecular logic underlying their use is not explained nor is it properly referenced. This …	Fan et al. investigated the role of norepinephrine (NE) release and signaling in the mPFC, among other regions, on memory encoding and retrieval. Importantly, they studied how this is regulated at the level of early tagging of memory engram cells and how NE contributes to remote memory during development. A such, this study addresses a timely and important topic in the memory engram field using a…	This is a monumental series of experiments showing that role of the locus coeruleus noradrenergic system in encoding, consolidation and retrieval of remote fear memory. The importance of these inputs for memory processing has been known for some time; however, these experiments provide strong corroborating evidence and add anatomical precision, using both gain and loss of function approaches. The…	N/A		-50	0	50	75	75	90			-40	10	50	85	80	80			-45	5	50	80	77.5	85
89	https://www.nature.com/articles/s41467-022-35350-x			2022-03-26	2022-11-30	249			x		E	56.3	Koen Kole	M	Maarten H. P. Kole	M	Parvalbumin basket cell myelination accumulates axonal mitochondria to internodes	Parvalbumin-expressing (PV+) basket cells are fast-spiking inhibitory interneurons that exert critical control over local circuit activity and oscillations. PV+ axons are often myelinated, but the electrical and metabolic roles of interneuron myelination remain poorly understood. Here, we developed viral constructs allowing cell type-specific investigation of mitochondria with genetically encoded…		1	x	In this research paper, Kole and colleagues report novel Cre-dependent AAV vectors allowing mitochondria and mitochondrial calcium changes to be investigated. Using these tools, they find that mitochondria cluster to myelinated segments of PV+ axons and that mitochondria at the AIS and in axons of PV+ interneurons are larger in size following demyelination. Mitochondria are lost in proximal branc…	Axons of parvalbumin +ve inhibitory interneurons in the cerebral cortex are extensive and have a complex arborisation. They are partially myelinated and the patterning of myelin is influenced by the shape of the axonal arborisation, such that sheaths tend to be more frequent proximally and are absent at branch points and en passant boutons. The function of myelin on Pv +ve interneurons is not ful…	In this paper, Kole et al. study, how in parvalbumin-positive (PV) interneurons myelination affects mitochondrial morphology, distribution and function – under normal conditions and during cuprizone-induced demyelination. While a number of studies have addresses the relationship between myelination and mitochondria, e.g. in the optic nerve, this study targets an inhibitory neuron population with …	N/A		60	80	60	80	50	75			60	70	70	90	30	50			60	75	65	85	40	62.5
90	https://www.nature.com/articles/s41467-022-35025-7			2022-06-10	2022-11-15	158	x				U	86.7	Travis J. Morgenstern	M	Henry M. Colecraft	M	Selective posttranslational inhibition of CaVβ1-associated voltage-dependent calcium channels with a functionalized nanobody	Ca2+ influx through high-voltage-activated calcium channels (HVACCs) controls diverse cellular functions. A critical feature enabling a singular signal, Ca2+ influx, to mediate disparate functions is diversity of HVACC pore-forming α1 and auxiliary CaVβ1–CaVβ4 subunits. Selective CaVα1 blockers have enabled deciphering their unique physiological roles. By contrast, the capacity to post-translatio…		1	x	In this study, Morgenstern et al describe the generation of nanobody that binds to Cavbeta1- associated Ca channels and thus decreases the channel's open probability as well as its trafficking to the membrane. Overall, I found the paper to outstanding for its novelty, rigorous experimentation and analyses, and broad impact. Although, in my view, additional experiments are not required, changes to…	The authors identified a nanobody nb.E8 and demonstrate, in a rigorous set of detailed experiments, that nb.E8 selectively binds (in a post-translational manner) the CavB1 SH3 domain and inhibits CavB1 associated HVACCs. The finding is an important following on an earlier report (reference 28) in which another nanobody was found to non-selectively inhibit HVACC beta subunits. The study introduces…	For three decades calcium channel researchers invoked the potential of the specific alpha – beta interactions as potential means for selectively modulating or inhibiting CaV channels in specific tissues. In their recent work, including this article, Henry Colecraft and collaborators successfully devised a strategy how this can be achieved. While alpha subunit specific inhibitors are available for…	N/A		90	70	90	100	95	95			80	60	90	80	90	85			85	65	90	90	92.5	90
91	https://www.nature.com/articles/s41467-022-35374-3			2022-06-10	2022-11-28	171	x				U		Ruth V. Nichols	F	Andrew C. Adey	M	High-throughput robust single-cell DNA methylation profiling with sciMETv2	DNA methylation is a key epigenetic property that drives gene regulatory programs in development and disease. Current single-cell methods that produce high quality methylomes are expensive and low throughput without the aid of extensive automation. We previously described a proof-of-principle technique that enabled high cell throughput; however, it produced only low-coverage profiles and was a di…		1	x	In this manuscript the authors reported sciMETv2, a single-cell methylome sequencing method that has significant improvements in terms of the technical performance over the previous version (sciMET) developed by the same research team. With sciMETv2, the authors demonstrated a 15x improvement of genome coverage at the single cell level, by increasing the efficiency of chromatin disruption (prior …	Single-cell epigenome analysis is a fast-growing field that has attracted enormous attention. Among the cutting-edge technologies, sci-MET is certainly very powerful in that it is capable of generating highthroughput single-cell methylomes. In this manuscript, the authors described sciMETv.2, which enables high-throughput and high-coverage single cell methylome analysis. They introduced two compl…	Most existing single-cell methylation profiling approaches are plate-based and are difficult to scale up without liquid handling robotics. The sci-MET method published in 2018 was a promising approach to enable combinatorial indexing-based library preparation of single-cell methylome libraries and can be performed without specialized equipment. However, as described in this updated manuscript, sc…	N/A		60	80	70	90	40	70			80	80	60	80	50	80			70	80	65	85	45	75
94	https://www.nature.com/articles/s41467-022-35299-x			2021-11-04	2022-11-23	384		x			A	81.5	Ya-Nan Zhao		Su-Rong Yang		GABAergic neurons in the rostromedial tegmental nucleus are essential for rapid eye movement sleep suppression	Rapid eye movement (REM) sleep disturbances are prevalent in various psychiatric disorders. However, the neural circuits that regulate REM sleep remain poorly understood. Here, we found that in male mice, optogenetic activation of rostromedial tegmental nucleus (RMTg) GABAergic neurons immediately converted REM sleep to arousal and then initiated non-REM (NREM) sleep. Conversely, laser-mediated i…		2	x	This manuscript found that RMTg GABAergic neurons promote REM sleep to wake transitions through disinhibition of glutamatergic LDT neurons. The experiments are rigorous, the manuscript is well written, very organized and uses many approaches to address the role of GABAergic RMTg neurons in REM sleep control. It is of great interest to the sleep field as well as the broader neuroscience community.…	The paper by Zhao et al. investigates whether and how GABAergic neurons in the rostromedial tegmental nucleus (RMTg) are involved in the suppression of REM sleep. At first, the authors labeled the Foxp1 immunoreactive neurons and found that Foxp 1 was expressed at higher levels and strongly colocalized with GABA in the RMTg. Consequently, the authors used viral approaches to target and manipulate…	Zhao et al. found that the rostromedial tegmental nucleus (RMTg) GABAergic (RMTg-GABA) neurons play an essential role in the regulation of rapid eye movement (REM) sleep. Chemogenetic activation of RMTg-GABA neurons decreased amount of REM sleep by decreasing the number of transitions from non-REM (NREM) sleep to REM sleep. Optogenetic activation of RMTg-GABA neurons during REM sleep induced tran…	N/A		60	70	40	60	70	80			80	80	30	80	50	70			70	75	35	70	60	75
95	https://www.nature.com/articles/s41467-022-35121-8			2022-04-28	2022-11-17	203			x		E	98.4	Damian M. Herz	M	Peter Brown	M	Dynamic control of decision and movement speed in the human basal ganglia	To optimally adjust our behavior to changing environments we need to both adjust the speed of our decisions and movements. Yet little is known about the extent to which these processes are controlled by common or separate mechanisms. Furthermore, while previous evidence from computational models and empirical studies suggests that the basal ganglia play an important role during adjustments of dec…		3	x	The authors speculate that the role of STN in decision-making is to control the release of a motor response. And to disentangle the cognitive decision-making and movement control, they designed the bilateral and unilateral DBS stimulation paradigm. The hypothesis is validated in a causal manner through the concrete evidence that only contralateral hand reaction time was affected. The manuscript i…	This incredibly interesting manuscript describes a rare set of behavioral, electrophysiological, and stimulation experiments in humans, focused on the subthalamic nucleus’ (STN’s) role in regulating decision and motor states. The authors had participants perform a simple variant of the dot motion task, indicating the left/right motion direction of the dots by squeezing a dynamometer in either han…	N/A	N/A		20	70	80	70					5	60	90	85					12.5	65	85	77.5
98	https://www.nature.com/articles/s41467-022-35118-3			2021-05-21	2022-11-18	546	x				U	50.4	Michelle M. Kameda-Smith	F	Sheila K. Singh	F	Characterization of an RNA binding protein interactome reveals a context-specific post-transcriptional landscape of MYC-amplified medulloblastoma	Pediatric medulloblastoma (MB) is the most common solid malignant brain neoplasm, with Group 3 (G3) MB representing the most aggressive subgroup. MYC amplification is an independent poor prognostic factor in G3 MB, however, therapeutic targeting of the MYC pathway remains limited and alternative therapies for G3 MB are urgently needed. Here we show that the RNA-binding protein, Musashi-1 (MSI1) i…		5	x	In the manuscript from Michelle et al. find that MSI1 is an essential mediator of MYC-amplified medulloblastoma (G3 MB) and reveal cancer-selective MSI1-bound targets through comparative integrative multi-omic analyses. The authors used a MYC-overexpressing mouse model and patient-derived xenografts to identify the essential role for MSI1 in G3 MB. The authors then identified direct binding targe…	In the manuscript entitled “Characterization of an RNA binding protein interactome reveals the targetable post-transcriptional landscape of MYC-amplified medulloblastoma” the authors identified Musashi-1 (MSI1) RNA targets in MB cell lines using multi-omic MSI1-eCLIP, RNA-seq, polysome profiling and TMT-MS. The molecular characterization of MSI1 functions and the identification of the putative ta…	The manuscript by Kameda-Smith et. al. describes a comprehensive study, indicating MSI1 plays an essential role in both G3 MB cancer stem cells and normal neural stem cells, directly targeting MSI1 which may cause severe side effects since childhood brain tumor patients are during critical neural development. Instead of targeting MSI1, the alternative method is to target cancer specific MSI1 targ…	N/A		80	80	60	70	10	80			80	70	50	70	50	70			80	75	55	70	30	75
99	https://www.nature.com/articles/s41467-022-35200-w			2022-02-28	2022-11-22	267			x		E		Martin Kubitschke	M	Olivia Andrea Masseck	F	Next generation genetically encoded fluorescent sensors for serotonin	We developed a family of genetically encoded serotonin (5-HT) sensors (sDarken) on the basis of the native 5-HT1A receptor and circularly permuted GFP. sDarken 5-HT sensors are bright in the unbound state and diminish their fluorescence upon binding of 5-HT. Sensor variants with different affinities for serotonin were engineered to increase the versatility in imaging of serotonin dynamics. Experi…		1	x	Kubitschke et al. describe the engineering and characterization of a genetically encoded fluorescent biosensor for serotonin (5-HT) called sDarken. Inspired by the dLight indicator from the Tian lab, they replace the third intracellular loop of the human 5-HT1A receptor with circularly permuted GFP. They optimize sensitivity by mutagenesis of the inter-domain linkers and make lower- and higher-af…	The neuromodulator serotonin (5-HT) is involved in a wide range of cognitive functions and is implicated in a number of psychiatric diseases. However, its functioning in the healthy brain remains elusive. 5-HT releasing neurons are located in small nuclei throughout the brainstem from which they send branching axons that innervate the entire brain through multiple (poorly resolved) pathways. Thus…	The authors have used straightforward methods to develop a GPCR-based serotonin sensor from the 5HT1A receptor, using the same principles previously used to develop the dLight dopamine sensor. This sensor (and the variants also produced here) appears to be an improvement over existing serotonin sensors both in terms of the fluorescence change and the affinity range covered. Controls were performe…	N/A		60	80	50	80	70	80			50	90	50	70	60	80			55	85	50	75	65	80
100	https://www.nature.com/articles/s41467-022-35163-y			2022-04-11	2022-11-21	224			x		E	60.1	Liying Zhang		Peter M. Zygmunt	M	Cannabinoid non-cannabidiol site modulation of TRPV2 structure and function	TRPV2 is a ligand-operated temperature sensor with poorly defined pharmacology. Here, we combine calcium imaging and patch-clamp electrophysiology with cryo-electron microscopy (cryo-EM) to explore how TRPV2 activity is modulated by the phytocannabinoid Δ9-tetrahydrocannabiorcol (C16) and by probenecid. C16 and probenecid act in concert to stimulate TRPV2 responses including histamine release fro…		1	x	Here the authors study the opening of TRPV2 by a cannabinoid compound, C16, and the TRPV2 agonist probenecid. The first part of the study focuses on the functional characterization of TRPV2 activation by the two ligands. The authors find that the effects of C16 and probenecid are synergistic, i.e. that application of one followed by application of the other produces a larger current than applicat…	Remarks to the Author: The manuscript untitled: ’Cannabinoid non-cannabidiol site modulation of TRPV2 structure and function’ submitted by Zhang et al, identified tetrahydrocannabiorcol as an agonist of TRPV2. Via cryo- EM studies the authors identified the interaction site of C16 on TRPV2, a site that was similar for the previously described ligand pocket for CBD and 2-APB. In addition, the auth…	x	N/A		20	80	50	65					20	70	30	80					20	75	40	72.5
101	https://www.nature.com/articles/s41467-022-35211-7			2022-02-07	2022-11-21	287		x			A		Jing-Jing Yan		Xiao-Hong Xu	F	A circuit from the ventral subiculum to anterior hypothalamic nucleus GABAergic neurons essential for anxiety-like behavioral avoidance	Behavioral observations suggest a connection between anxiety and predator defense, but the underlying neural mechanisms remain unclear. Here we examine the role of the anterior hypothalamic nucleus (AHN), a node in the predator defense network, in anxiety-like behaviors. By in vivo recordings in male mice, we find that activity of AHN GABAergic (AHNVgat+) neurons shows individually stable increas…		2	x	The authors performed an interesting study showing that activity in the projection from ventral subiculum to vgat anterior hypothalamus cells is sufficient and necessary for anxiety-related behaviors in mice. They also show increases in neural activity during proximity to open spaces in anterior hypothalamus vgat cells and in hypothalamusprojecting subiculum cells. Taken together, this work ident…	The paper by Yan et al. examines how AHN vGAT+ neurons encode and control avoidance behavior in innately aversive contexts. The authors find that vGAT+AHN cells increase in activity during approach/retreat to/from a novel object in the OFT or to the open arms of the EPM, and not to control familiar objects or unfamiliar social interaction. They find that this effect correlates with increasing tim…	In this manuscript, the authors conduct a series of experiments aimed at linking anxiety-related behavior and predator defense. They focus their work on the role of the AHN, as this nucleus has been implicated in both classes of behavior. Using multiple behavioral assays, genetically-targeted loss of function approaches, in vivo recordings, retrograde tracing, and ephys, the authors identify a po…	N/A		70	80	-20	10	80	50			75	50	0	50	80	50			72.5	65	-10	30	80	50
105	https://www.nature.com/articles/s41467-022-34805-5			2021-10-21	2022-11-07	382	x				U	97.6	Johannes Bill	M	Jan Drugowitsch	M	Visual motion perception as online hierarchical inference	Identifying the structure of motion relations in the environment is critical for navigation, tracking, prediction, and pursuit. Yet, little is known about the mental and neural computations that allow the visual system to infer this structure online from a volatile stream of visual information. We propose online hierarchical Bayesian inference as a principled solution for how the brain might solv…		4	x	I find the work very interesting and an important contribution to the field. The manuscript itself is very thorough with impressive attention to detail including figures and supplementary information. I have only minor and very minor points. Reference #9 Weiss et al. (2002). A recent publication) demonstrated that a “slow prior” for motion perception may reflect speed-contrast association rather …	This paper presents a hierarchical inference algorithm to extract global and local motion patterns from velocity input, and several examples showing that the algorithm captures human psychophysics data (from previous publications) and motion illusion phenomenology. They further present a neural network model implementation of the algorithm and suggest that the model captures properties of MT neur…	N/A	N/A		80	90	-50	50					80	90	-40	20					80	90	-45	35
106	https://www.nature.com/articles/s41467-022-35197-2			2021-12-07	2022-11-21	349		x			A		Xiaoguang Tian		Cirong Liu	M	An integrated resource for functional and structural connectivity of the marmoset brain	Comprehensive integration of structural and functional connectivity data is required to model brain functions accurately. While resources for studying the structural connectivity of non-human primate brains already exist, their integration with functional connectivity data has remained unavailable. Here we present a comprehensive resource that integrates the most extensive awake marmoset resting-…		2	x	This paper provides very important resources of marmoset MRI data including T2w, resting-state fMRI and in-vivo diffusion MRI. The strength of this study is excellent resting state fMRI dataset which are collected from a large sample of animals using two ultrahigh-field MRI scanners. The reviewer appreciates the authors’ generosity to make these datasets publicly available and recommend the autho…	The authors provide a huge comprehensive data set acquired in marmosets encompassing awake resting state fMRI, in-vivo DTI, high resolution ex-vivo DTI and a large collection of neuronal tracing data. Moreover, the authors relied on this massive data set, in combination with deep learning and computational modelling, to propose a parcellation scheme of the cortex and to link anatomical properties…	x	N/A		50	70	-50	50					40	70	80	90					45	70	15	70
107	https://www.nature.com/articles/s41467-022-35198-1			2022-01-20	2022-11-22	306			x		E	66	Ruth Styfhals	F	Eve Seuntjens	F	Cell type diversity in a developing octopus brain	Octopuses are mollusks that have evolved intricate neural systems comparable with vertebrates in terms of cell number, complexity and size. The brain cell types that control their sophisticated behavioral repertoire are still unknown. Here, we profile the cell diversity of the paralarval Octopus vulgaris brain to build a cell type atlas that comprises mostly neural cells, but also multiple glial …		1	x	Styfhals and colleagues present a manuscript leveraging new single-cell sequencing data to understand cell type diversity in the paralarval brain of Octopus vulgaris. As the O. vulgaris genome assembly is not well resolved, they employ an idiosyncratic method to map their reads onto the genome of Octopus sinensis, which has a chromosomal scale assembly. They produce Isoseq and FLAMseq to improve …	Styfhals et al. characterize cellular diversity in the paralarval octopus brain using single cell and single nucleus RNA-seq. This work provides an important first step in describing the molecular diversity of neural cells in an understudied invertebrate species. It appears that only the most common or distinct cell types were captured, and that these types include neuronal and non-neuronal cells…	Styfhals et al manuscript presents a novel single cell dataset of the developing octopus brain. I found the study to be of interest and a valuable contribution to the community for the study of cell type evolution across species. This dataset can also be beneficial to further improve cross species analysis methods, which is still an under researched area that can shed light on human biology of di…	N/A		20	50	60	80	70	90			20	75	50	70	75	85			20	62.5	55	75	72.5	87.5
108	https://www.nature.com/articles/s41467-022-35166-9			2021-04-30	2022-11-21	570			x		E		Carole Siret	F	Serge van de Pavert	M	Deciphering the heterogeneity of the Lyve1+ perivascular macrophages in the mouse brain	Perivascular macrophages (pvMs) are associated with cerebral vasculature and mediate brain drainage and immune regulation. Here, using reporter mouse models, whole brain and section immunofluorescence, flow cytometry, and single cell RNA sequencing, besides the Lyve1+F4/80+CD206+CX3CR1+ pvMs, we identify a CX3CR1– pvM population that shares phagocytic functions and location. Furthermore, the brai…		1	x	This manuscript describes a novel cell type that appears to be located near the vasculature of the brain and can phagocytose particles. Based on this and the F4/80 expression and Lyve-1 expression the authors conclude and entitle their paper a CD45-negative perivascular macrophage... The paper is interesting but I would make a few suggestions. 1) Based on the behaviour and the F4/80 data and the …	Siret et al. report on a previously unidentified population of non-neuronal cell associated with cerebral blood vessels and expressing the lymphatic vessel marker Lyve1 but lacking CD45, as well as other markers of brain-resident myeloid cells. Located near blood vessels, the cells resemble perivascular macrophages (PVM) but lack classical PVM markers (mrc1, CD163, etc.). The cells lack other lym…	In the current study by Siret et al, the authors describe a perivascular macrophage population positive for Lyve1 but negative for common macrophage markers including nonparenchymal brain macrophages like Cx3cr1, CD206 and CD163. These non-conventional perivascular macrophages (pvM2) were associated to vessels. While they expressed F4/80, they were not positive for PU.1 but needed it for their di…	N/A		20	70	60	80	-60	70			10	50	50	70	-40	25			15	60	55	75	-50	47.5
110	https://www.nature.com/articles/s41467-022-35028-4			2022-01-25	2022-11-16	295			x		E		Diana Rodrigues	F	Patricia Monteiro	F	Chronic stress causes striatal disinhibition mediated by SOM-interneurons in male mice	Chronic stress (CS) is associated with a number of neuropsychiatric disorders, and it may also contribute to or exacerbate motor function. However, the mechanisms by which stress triggers motor symptoms are not fully understood. Here, we report that CS functionally alters dorsomedial striatum (DMS) circuits in male mice, by affecting GABAergic interneuron populations and somatostatin positive (SO…		2	x	This is an interesting study on the effect of chronic stress on striatal function related to GABAergic control of MSNs and associated behaviors. The individual experiments are well-conducted but there is a significant number of concerns regarding the flow of logic and aspects of brain diseases that are modeled. 1) A case is made for modeling aspects of OCD, but the behavioral components of the st…	Rodrigues et all perform a multilevel examination of the effects of chronic stress on striatal activity. The manuscript is very informative. The manuscript is well written and the figures are really clear and easy to understand. The authors use two models of chronic stress: swim test and social defeat, which add to the rigor of reproducibility of the manuscript. Authors combine state of art metho…	This work aims at deciphering the mechanisms underlying stress-induced motor dysfunction. Indeed, chronic stress exposure is associated with a number of neuropsychiatric disorders such as obsessivecompulsive disorder (OCD), posttraumatic stress disorder (PTSD), anxiety and depression but it also worsens the progression of motor-associated conditions notably Parkinson’s and Huntington diseases. Th…	N/A		0	70	80	80	90	80			10	60	80	80	75	60			5	65	80	80	82.5	70
111	https://www.nature.com/articles/s41467-022-34867-5			2022-03-03	2022-11-10	252	x	x				90.1	Zhiyuan Yuan		Michael Q. Zhang	M	SOTIP is a versatile method for microenvironment modeling with spatial omics data	The rapidly developing spatial omics generated datasets with diverse scales and modalities. However, most existing methods focus on modeling dynamics of single cells while ignore microenvironments (MEs). Here we present SOTIP (Spatial Omics mulTIPle-task analysis), a versatile method incorporating MEs and their interrelationships into a unified graph. Based on this graph, spatial heterogeneity qu…		1	x	Yuan et al. present a new method, SOTIP (Spatial Omics mulTIPle-task analysis), and show its versatility in analyzing a variety of spatial omics datasets including spatially resolved transcriptomics data and proteomics data. In particular, the algorithm performs 3 main analytical functions including spatial heterogeneity quantification (SHN), spatial domain identification (SDM), and differential …	The manuscript described SOTIP, a suite of software tools for analyzing spatial omics data, where the molecular profiles of individual functional units in the tissue are linked to the spatial location of that unit. For technologies such as Visium and Slide-seq, the functional units are spots or beads used to capture the local RNA molecules, thus the RNAseq data for individual spots or beads are a…	The authors propose a method called SOTIP to perform three main tasks: 1) spatial heterogeneity quantification, 2) spatial domain identification, and 3) differential microenvironment analysis. Those tasks are tackled by constructing a MECN graph that uses the gene expression and cell-type information of the neighbourhood. The authors demonstrated their method via both simulation and real data. In…	N/A		60	80	0	90	50	80			50	80	40	70	30	80			55	80	20	80	40	80
113	https://www.nature.com/articles/s41467-022-34846-w			2021-06-30	2022-11-09	497			x		E	81.2	Elisa Duregotti	F	Manuel Mayr	M	Reduced secretion of neuronal growth regulator 1 contributes to impaired adipose-neuronal crosstalk in obesity	While the endocrine function of white adipose tissue has been extensively explored, comparatively little is known about the secretory activity of less-investigated fat depots. Here, we use proteomics to compare the secretory profiles of male murine perivascular depots with those of canonical white and brown fat. Perivascular secretomes show enrichment for neuronal cell-adhesion molecules, reflect…		1	x	The manuscript by Duregotti et al. uses mass spectrometry to compare the secreted proteome of perivascular adipose tissue (PVAT) explants to more well studied white and brown fat depots. The authors note that the PVAT secretome is enriched for proteins involved in neuronal cell adhesion, consistent with the increase in sympathetic nerve projections in this depot. The authors then studied PVAT fro…	In the underlying manuscript the authors investigate different adipose tissue secretomes in ob/ob mice and humans using a proteomics-based approach. In particular, they compared secretory profiles of three distinct perivascular and three canonical depots. Epicardial fat derived from humans was used to validate the results. They found, that obesity is associated with significant changes of perivas…	In this study Duregotti and colleagues performed proteomics analyses to define the secretory profiles of different adipose tissue (AT) depots from wt and obese (ob/ob) mice. This lead to the observation that perivascular AT (PVAT) has a denser sympathetic innervation compared to other fat tissues. In ob/ob mice, they observed a loss of sympathetic axons in perivascular and SC depots. Mechanistica…	N/A		-40	10	70	80	60	90			-30	60	80	60	60	80			-35	35	75	70	60	85
114	https://www.nature.com/articles/s41467-022-34719-2			2022-02-25	2022-11-01	249			x		E	55.8	Camila Fernández Zapata	F	Chotima Böttcher	F	Differential compartmentalization of myeloid cell phenotypes and responses towards the CNS in Alzheimer’s disease	Myeloid cells are suggested as an important player in Alzheimer´s disease (AD). However, its continuum of phenotypic and functional changes across different body compartments and their use as a biomarker in AD remains elusive. Here, we perform multiple state-of-the-art analyses to phenotypically and metabolically characterize immune cells between peripheral blood (n = 117), cerebrospinal fluid (C…		5	x	This manuscript from Zapta et al. titled, “Differential compartmentalization of myeloid cell phenotypes and responses towards the CNS in Alzheimer’s disease,” explores immune cell phenotypic differences between the blood and cerebrospinal fluid (CSF) in healthy adult patients and those with Alzheimer’s disease (AD). The authors provide data showing phenotypic differences in immune cell population…	The authors Zapata et al., have presented an interesting study on the myeloid cell phenotypes in healthy and AD individuals. However, the study needs some additional analysis and clarification that are suggested here: 1. The authors have provided donor and patient information. But details like the number of males and females in this study, APOE status of the individuals, Braak or CERAD, or cognit…	Fernández Zapata and colleagues provide a detailed analysis of multiple human compartments and cell types with various high-dimensional technologies. In their study, they comprehensively characterized human-derived samples of blood, cerebrospinal fluid, choroid plexus, and brain parenchyma while focusing on immune cell abundance and phenotype. The authors used several algorithms to analyze the ge…	N/A		20	70	60	70	20	80			30	80	70	80	60	70			25	75	65	75	40	75
115	https://www.nature.com/articles/s41467-022-34679-7			2021-09-10	2022-11-01	417	x				U	74.5	Gema Lordén	F	Alexandra C. Newton	F	Enhanced activity of Alzheimer disease-associated variant of protein kinase Cα drives cognitive decline in a mouse model	Exquisitely tuned activity of protein kinase C (PKC) isozymes is essential to maintaining cellular homeostasis. Whereas loss-of-function mutations are generally associated with cancer, gain-of-function variants in one isozyme, PKCα, are associated with Alzheimer’s disease (AD). Here we show that the enhanced activity of one variant, PKCα M489V, is sufficient to rewire the brain phosphoproteome, d…		5	x	This is a superb study in which the authors undertake thorough examination of a gain of variant in one isoform of PKCalpha (M489V) that is associated with Alzheimer’s disease. The authors undertake a variety of analyses to characterise this knock-in mouse strain and compare it with wild type as well as heterozygous animals. They demonstrate that the PKCalpha M489V variant markedly enhances the ph…	Lordén et al. report a nice and broad multi-method analysis of a mouse modeling the AD-associated PKC variant M489V. The Reviewer considered the study to have several strengths including an important topic of broad interest, diverse techniques support the proposed conclusions, and a generally well written and understandable narrative. However, several substantial critiques were noted, and the cur…	In this ms by Lordén et al, the authors have addressed the question of an AD-associated mutation located in PKCa found in a few families affected by LOAD. The authors produce mice with a PKCaM489V mutation. The authors found that the PKCa mutation changed the p-proteome including some substrates of PKCa, leading to a slight decreased spine denisity, alterations in memory in mice with the PKCa mut…	N/A		90	85	50	60	70	80			95	90	30	50	70	80			92.5	87.5	40	55	70	80
116	https://www.nature.com/articles/s41467-022-34331-4			2022-04-26	2022-10-21	178			x		E	81.2	Richard Taylor	M	Corinne Houart	F	Prematurely terminated intron-retaining mRNAs invade axons in SFPQ null-driven neurodegeneration and are a hallmark of ALS	Loss of SFPQ is a hallmark of motor degeneration in ALS and prevents maturation of motor neurons when occurring during embryogenesis. Here, we show that in zebrafish, developing motor neurons lacking SFPQ exhibit axon extension, branching and synaptogenesis defects, prior to degeneration. Subcellular transcriptomics reveals that loss of SFPQ in neurons produces a complex set of aberrant intron-re…		5	x	Mutation of SFPQ is associated with motor degeneration and maturation deficits that occur in ALS. As a splice regulator, it has been thought that SFPQ mutation leads to aberrant splicing and accumulation of toxic aggregating products that lead to neurodegeneration. In this work, the authors explore the mechanism by which SFPQ loss of function leads to neurodegeneration in vivo and in cell culture…	“ALS-associated loss of SFPQ triggers neurodegeneration through neurite localisation of prematurely terminated intron-retaining mRNAs” by Taylor et al reports interesting new phenomena related to mRNA processing in neurons as it might relate to ALS/ Motor Neuron disease. The authors find that disruption to the splicing factor SFPQ leads to a range of aberrant mRNA processing events including the …	In this manuscript, Taylor et al. reported the observation that the loss of SFPQ in neurons led to an accumulation of intron-containing transcripts in neurite. If true, this result may help understand the role of SFPQ in ALS. However, more analyses are needed to strengthen this conclusion. In addition, while such an association is interesting, in the absence of more mechanistic data, the authors …	N/A		80	50	60	90	0	80			80	80	80	60	0	70			80	65	70	75	0	75
117	https://www.nature.com/articles/s41467-022-34662-2			2022-03-18	2022-11-01	228		x			A	79.3	Junli Zhao		Yi Wang	M	Activated astrocytes attenuate neocortical seizures in rodent models through driving Na+-K+-ATPase	Epileptic seizures are widely regarded to occur as a result of the excitation-inhibition imbalance from a neuro-centric view. Although astrocyte-neuron interactions are increasingly recognized in seizure, elementary questions about the causal role of astrocytes in seizure remain unanswered. Here we show that optogenetic activation of channelrhodopsin-2-expressing astrocytes effectively attenuates…		5	x	This is an impressive study when one looks at the totality of data. However, is it impactful or not? Is it largely confirming long known facts? As an astrocyte biologist I am struggling to come up with the definitive answer. Let me explain. Involvement of glia in the etiology of certain forms of epilepsy have been suggested for over 50 years, starting with studies by Pollen and Trachtenberg (1970…	In this manuscript, Zhao et al. reports astrocytes decrease hyperexcitability of pyramidal neurons under seizure conditions by maintaining optimal extracellular K level through NaKATPase. Overall, authors are investigating important topic of the role of astrocytes in regulating neuronal excitability using chemoconvulsant-induced seizure models. Although authors have utilized multiple approaches t…	This manuscript reports that selectively activating Channel-rhodopsin (ChR2) in cortical astrocytes attenuates neocortical seizures. The authors show that this attenuation is independent of rapid Ca++ signaling, which is confirmed to promote or facilitate seizure genesis consistent previous reports. Instead, the seizure attenuating effect of ChR2-activation of astrocytes is shown to be related to…	N/A		20	70	70	80	70	80			10	70	30	70	70	80			15	70	50	75	70	80
118	https://www.nature.com/articles/s41467-022-34811-7			2021-11-03	2022-11-08	370	x				U		Hsueh-Fu Wu		Nadja Zeltner	F	Norepinephrine transporter defects lead to sympathetic hyperactivity in Familial Dysautonomia models	Familial dysautonomia (FD), a rare neurodevelopmental and neurodegenerative disorder affects the sympathetic and sensory nervous system. Although almost all patients harbor a mutation in ELP1, it remains unresolved exactly how function of sympathetic neurons (symNs) is affected; knowledge critical for understanding debilitating disease hallmarks, including cardiovascular instability or dysautonom…		5	x	The team has developed a new way to generate sympathetic neuron from hPSCs, then applied to FD modeling. They found that FD sympathetic neurons show intrinsically hyperactive in vitro culture, and also similar features when co-cultured with CM and in vivo FD model. Further they found that the hyperactivities are still present in the neurons derived from isogenic PSC control, which is puzzling. In…	In this elegant study Zeltner’s team show that sympathetic neurons derived from human pluripotent stem cells of patients with Familial Dysautonomia are spontaneously hyperactive and have reduced activity of the norepinephrine transporter. Multi-electrode-array recordings show increased spike frequency compared to sympathetic cells derived from controls. Interestingly, hyperactivity only occurred …	In this study the authors used patient-derived human pluripotent stem cells (hPSC) to characterize the sympathetic neuron (symN)-specific disease mechanism underlying FD autonomic dysfunction. They demonstrated that FD symNs are intrinsically hyperactive and that a defective norepinephrine autoregulatory pathway underlies the observed hyperactivity. They then used their well-characterized cellula…	N/A		60	80	90	70	10	80			50	70	80	70	50	70			55	75	85	70	30	75
119	https://www.nature.com/articles/s41467-022-34443-x			2021-10-24	2022-10-25	366	x				U	78.7	Kun Do Rhee		Xian-Jie Yang	F	Ciliary neurotrophic factor-mediated neuroprotection involves enhanced glycolysis and anabolism in degenerating mouse retinas	Ciliary neurotrophic factor (CNTF) acts as a potent neuroprotective cytokine in multiple models of retinal degeneration. To understand mechanisms underlying its broad neuroprotective effects, we have investigated the influence of CNTF on metabolism in a mouse model of photoreceptor degeneration. CNTF treatment improves the morphology of photoreceptor mitochondria, but also leads to reduced oxygen…		5	x	This is an interesting and exciting study that details mechanisms of neuroprotection of CNTF on retina metabolism in a mouse model of retinitis pigmentosa. The authors show improved morphology of photoreceptor mitochondria in the Prph2 model of retinal degeneration. CNTF treatment resulted in elevated extracellular acidification rate, as a surrogate for glycolysis. Further, CNTF treatment increas…	Herein the authors investigate the metabolic rewiring that occurs in a mouse model of RP with and without lentiviral expression of CNTF, a therapeutic currently in clinical trials but whose mechanism of action is not fully established. The authors present a nice report with multiple analytical approaches to probing and profiling metabolism, however, some improvements are necessary to reach the hi…	The manuscript NCOMMS-21-42240, "CNTF-mediated neuroprotection involves enhanced glycolysis and anabolic activities in degenerating retinas" is a comprehensive metabolomics study of the effects of ciliary neurotrophic factor (CNTF) in the rds mouse model of retinal degeneration. This work represents an extension of the authors’ previous work on CNTF-mediated protection of photoreceptors (Rhee et …	Key Results: Ciliary neurotrophic factor (CNTF) is one of the most studied neurotrophic factors in the retina and exhibits potent neuroprotective activity in many models of retinal degeneration, however, mechanisms underlying its actions are incompletely understood. The authors of this paper investigated the influence of CNTF on retinal metabolism in a mouse model of retinitis pigmentosa. Employi…		80	90	50	60	90	70	80	60	80	80	50	80	80	80	80	80	80	85	50	70	85	75	80
121	https://www.nature.com/articles/s41467-022-34476-2			2020-05-14	2022-10-24	893			x		E		Aurélie de Thonel	F	Valérie Mezger	F	CBP-HSF2 structural and functional interplay in Rubinstein-Taybi neurodevelopmental disorder	Patients carrying autosomal dominant mutations in the histone/lysine acetyl transferases CBP or EP300 develop a neurodevelopmental disorder: Rubinstein-Taybi syndrome (RSTS). The biological pathways underlying these neurodevelopmental defects remain elusive. Here, we unravel the contribution of a stress-responsive pathway to RSTS. We characterize the structural and functional interaction between …		5	x	This manuscript represents a major advance in understanding how mutations in a global protein acetylase, underlying a rare neurodevelopmental disorder, impacts cellular stress protection and neurodevelopment. Launching from previous work by these labs on the role and regulation of the lesser appreciated HSF, HSF2, in neuronal development, stress protection and beyond, this report provides an exce…	It is very important to elucidate the molecular mechanism of Rubinstein-Taybi neurodevelopment disorder, in particular how specific mutations in CBP/EP300 affect downstream targets, which in turn affect neurodevelopmental processes. In such a study, both biochemical/cellular dissection of molecular cascades and the validation of the biological relevance of the elucidated molecular cascades (in pa…	The authors presented data showing altered acetylation of HSF2 possibly instigates the neurodevelopmental deficits in Rubinstein-Taybi Syndrome (RSTS). They found that mutations of CBP or EP300 impair the stability of the short-lived HSF2 protein and in turn decreases the expression of genes that affect neural development. They also employed BTZ to upregulate HSF2 levels and restore the expressio…	HATs and HDACs conduct protein acetylation, including both histones and other proteins. It is believed that HATs and HDACs are important in brain development and also in neuron functionality. HDACs inhibitors have been long used in clinics to treat various neurological deficits including memory formation, mood, drug addiction, and neuroprotection, suggesting a role for HAT/HDAC in neuron homeosta…		90	80	-30	60	50	80	60	80	90	100	-30	60	50	80	50	80	90	90	-30	60	50	80	55
122	https://www.nature.com/articles/s41467-022-34410-6			2021-06-22	2022-10-25	490			x		E	98.8	Dian Lyu		Emmanuel A. Stamatakis	M	Intrinsic brain dynamics in the Default Mode Network predict involuntary fluctuations of visual awareness	Brain activity is intrinsically organised into spatiotemporal patterns, but it is still not clear whether these intrinsic patterns are functional or epiphenomenal. Using a simultaneous fMRI-EEG implementation of a well-known bistable visual task, we showed that the latent transient states in the intrinsic EEG oscillations can predict upcoming involuntarily perceptual transitions. The critical sta…		3	x	This study aims to explore the relationship between (conscious) perception/visual awareness and the intrinsic dynamics of large-scale networks (esp. the DMN). More specifically, the objective is to determine whether such intrinsic dynamics serve a role in perceptioN/Awareness. To do this, the authors utilize data from an EEG-fMRI experiment that had two main conditions: 1) binocular rivalry (BR) …	The authors of this manuscript presented binocular rivalry stimuli and non-rivalrous replay variants and used simultaneously recorded fMRI- and EEG data to investigate the causal role of the endogenous dynamics of brain areas from the Default Mode Network (DMN) for spontaneous endogenous perceptual reversals. They applied several sophisticated data analysis methods (e.g. the time-delay embedded H…	This study re-analyzed a published EEG-fMRI dataset on binocular rivalry. Based on EEG-informed analysis, the previous study revealed suppressed BOLD activities in posterior region of the default model network (DMN) associated with perceptual transitions. The current study used more sophisticated analysis appoaches on the EEG data and suggest that the precuneus (PCU), a key node of DMN, plays a c…	N/A		50	70	70	50	10	60			50	80	20	60	0	50			50	75	45	55	5	55
126	https://www.nature.com/articles/s41467-022-34604-y			2022-05-16	2022-10-28	165			x		E	29.9	Devendra Kumar Maurya	M	Staffan Bohm	M	A multivesicular body-like organelle mediates stimulus-regulated trafficking of olfactory ciliary transduction proteins	Stimulus transduction in cilia of olfactory sensory neurons is mediated by odorant receptors, Gαolf, adenylate cyclase-3, cyclic nucleotide-gated and chloride ion channels. Mechanisms regulating trafficking and localization of these proteins in the dendrite are unknown. By lectin/immunofluorescence staining and in vivo correlative light-electron microscopy (CLEM), we identify a retinitis pigmento…		1	x	The manuscript by Maurya and colleagues addresses the transport of olfactory transduction proteins in the dendrites of olfactory sensory neurons. They are using a combination of immunofluorescent and electron microscope to show the nature of organelle that shuttles proteins along and how its fate is affected by increased cAMP levels. Their results are novel, interesting, timely and mostly well su…	In this paper by Maurya et al. immunofluorescence and CLEM are used to investigate the trafficking and sub-cellular localization of proteins involved in sensory transduction in olfactory neurons. Specifically, the authors show that many key proteins including odorant receptors and cyclic nucleotide-gated ion channels are localized in large dendritically positioned puncta. This was first shown by …	This manuscript describes a new type of multivesicular body-like organelles in the dendrite of olfactory receptor neurons (ORNs). Using immuno/chemical fluorescence confocal microscopy and CLEM, the authors show that these ORN dendritic MVBs contain most olfactory transduction proteins. These MVBs contain ESCRT-0 proteins but not the downstream ESCRT complex proteins. These MVBs are associated wi…	N/A		70	60	70	90	60	80			80	70	70	80	70	60			75	65	70	85	65	70
127	https://www.nature.com/articles/s41467-022-34720-9			2022-05-16	2022-10-31	168		x			A		Ziyue Wang		Min Xu	M	REM sleep is associated with distinct global cortical dynamics and controlled by occipital cortex	The cerebral cortex is spontaneously active during sleep, yet it is unclear how this global cortical activity is spatiotemporally organized, and whether such activity not only reflects sleep states but also contributes to sleep state switching. Here we report that cortex-wide calcium imaging in mice revealed distinct sleep stage-dependent spatiotemporal patterns of global cortical activity, and m…		2	x	This is an interesting paper that provides further evidence in support of the active role of the cortex in sleep control. In my comments below, I highlight a number of important omissions, and in some cases clarification or further analysis is required. I group my comments into conceptual ones, concerning the use of terminology or reference to earlier literature, and methodological issues. Concep…	In Wang et al. authors investigate spontaneous global cortical activity using wide-field calcium imaging in mice to determine sleep-dependent spatiotemporal patterns of cortical activity. The authors claim that occipital activity patterns have an active role in regulating sleep states, specifically in the transition from NREM to REM sleep. The study design is simple, and the methodology used eleg…	N/A	N/A		0	75	50	75					30	70	50	80					15	72.5	50	77.5
129	https://www.nature.com/articles/s41467-022-34625-7			2021-12-06	2022-11-01	330			x		E	56.3	Louisa E. Linders	F	Frank J. Meye	M	Stress-driven potentiation of lateral hypothalamic synapses onto ventral tegmental area dopamine neurons causes increased consumption of palatable food	Stress can cause overconsumption of palatable high caloric food. Despite the important role of stress eating in obesity and (binge) eating disorders, its underlying neural mechanisms remain unclear. Here we demonstrate in mice that stress alters lateral hypothalamic area (LHA) control over the ventral tegmental area (VTA), thereby promoting overconsumption of palatable food. Specifically, we show…		2	x	The manuscript by Linders et al., describes the role of LHA-to-VTA glutamatergic inputs on stress induced palatable food consumption. The stress-induced increase in the excitatory drive to VTA DA neurons is somewhat reported, however, this work specifically focused on the importance of LHA-to- VTA inputs. Using patch clamp recording as well as optogenetic manipulation, authors elucidate the synap…	In this manuscript, Linders and colleagues carried out a series of functional circuit mapping and electrophysiological recording experiments to show that acute social stress strengthens LHA glutamatergic inputs to VTA DA neurons, which may underlie hedonic overeating in these stressed animals by increasing DA release in the mPFC but not NAc-shell. Although the findings are not completely novel an…	Linders et al., perform a series of experiments aimed at understanding the role of lateral hypothalamic projections to the ventral tegmental area in influencing palatable food intake after an acute stressful experience. The authors argue that LHA-Vglut2 neurons projecting to the VTA are responsible for altering excitatory synaptic input to VTA dopamine neurons to increase palatable food consumpti…	N/A		50	80	20	70	40	80			80	70	20	70	70	80			65	75	20	70	55	80
130	https://www.nature.com/articles/s41467-022-34555-4			2022-01-12	2022-10-27	288		x			A		Mingyue Jin		Shinji Hirotsune	M	DOPAnization of tyrosine in α-synuclein by tyrosine hydroxylase leads to the formation of oligomers	Parkinson’s disease is a progressive neurodegenerative disorder characterized by the preferential loss of tyrosine hydroxylase (TH)-expressing dopaminergic neurons in the substantia nigra. Although the abnormal accumulation and aggregation of α-synuclein have been implicated in the pathogenesis of Parkinson’s disease, the underlying mechanisms remain largely elusive. Here, we found that TH conver…		1	x	In the study by Jin et al., the authors describe a posttranslational modification of alpha-Synuclein (aSyn) on tyrosine 136, resulting in its conversion to dihydroxyphenylalanine (Y136DOPA). Y136DOPA was identified in vitro using mass spectrometry. Furthermore, the authors developed a mouse monoclonal antibody, with which Y136DOPA was also identified in established cell and animal models for Park…	The manuscript presents a strong case of involvement of tyrosine DOPAnization of α-synuclein in potential pathogenesis of Parkinson’s disease. The authors have demonstrated the modified site in protein α-synuclein with some neatly designed experiments including the use of Y136DOPAmab for specificity. Despite the evidence provided, many details are missing, especially for the mass spectrometric da…	N/A	N/A		20	70	60	70					20	80	50	70					20	75	55	70
131	https://www.nature.com/articles/s41467-022-34735-2			2022-05-20	2022-11-04	168		x			A	41.2	Shuai Zhang		Sheng-Tao Hou	M	Hypothermia evoked by stimulation of medial preoptic nucleus protects the brain in a mouse model of ischaemia	Therapeutic hypothermia at 32-34 °C during or after cerebral ischaemia is neuroprotective. However, peripheral cold sensor-triggered hypothermia is ineffective and evokes vigorous counteractive shivering thermogenesis and complications that are difficult to tolerate in awake patients. Here, we show in mice that deep brain stimulation (DBS) of warm-sensitive neurones (WSNs) in the medial preoptic …		5	x	This paper investigates the idea that deep brain stimulation (DBS) in the medial preoptic area (MPO) can be used to lower body temperature and thereby prevent brain tissue damage associated with ischaemia. A strength of the manuscript is a careful side-byside comparison of how surface cooling and chemogenetic stimulation of warm-sensitive neurons (WSNs) differentially effect a wide range of outpu…	Excellent manuscript with detailed description of the chemical and surface cooling with thoroughly explored outcomes and temperature monitoring. I would like to see a better description of the certainty that the DBS truly was in the medial preoptic nucleus or discuss possible neighboring effects.	The authors submit an interesting and thought-provoking manuscript on the possible development of a DBS-based intervention to produce hypothermia and reduction of metabolism for neuroprotection. The concept is very interesting and pioneering and the authors have conducted extensive experimentation for proof-of-principle as well as mechanistic examination. The following are points of concern or fo…	N/A		50	60	80	70	70	80			70	60	80	80	50	80			60	60	80	75	60	80
132	https://www.nature.com/articles/s41467-022-34517-w			2022-04-18	2022-10-26	191	x				U		Kelsey M. Vollmer	F	James M. Otis	M	An opioid-gated thalamoaccumbal circuit for the suppression of reward seeking in mice	Suppression of dangerous or inappropriate reward-motivated behaviors is critical for survival, whereas therapeutic or recreational opioid use can unleash detrimental behavioral actions and addiction. Nevertheless, the neuronal systems that suppress maladaptive motivated behaviors remain unclear, and whether opioids disengage those systems is unknown. In a mouse model using two-photon calcium imag…		2	x	The present study by Vollmer, Green et al. test the hypothesis that a thalamostriatal circuit inhibits reward seeking during exposure to fear-provoking stimuli and that opioid receptor activation promotes risky behavior in the face of these stimuli by inhibiting this circuit via a presynaptic site of action. First the authors demonstrate that thalamostriatal PVT cells display heterogenous calcium…	Vollmer et al. report the results of an interesting series of experiments providing much needed new knowledge on the organisation of the thalamostriatal pathway from paraventricular thalamus to nucleus accumbens in reward seeking behavior. The authors show, quite convincingly, that this circuit involves inputs onto parvalbumin neurons in the accumbens, is enriched in calcium permeable AMPA recept…	The manuscript by Vollmer et al. describes the role of PVT-NAc projection in the suppression of sucrose seeking. Using the head-fixed sucrose seeking paradigm, authors performed two-photon imaging and optogenetic manipulation of PVT neurons projecting to NAc. Furthermore, the authors examine the role of the opioid receptors in this neuronal type. Overall, all experiments are well designed and per…	N/A		50	75	80	80	50	80			50	70	80	100	40	70			50	72.5	80	90	45	75
133	https://www.nature.com/articles/s41467-022-34131-w			2022-03-31	2022-10-14	197			x		E	89.5	Laura Tomas-Roca	F	Seth G. N. Grant	M	Developmental disruption and restoration of brain synaptome architecture in the murine Pax6 neurodevelopmental disease model	Neurodevelopmental disorders of genetic origin delay the acquisition of normal abilities and cause disabling phenotypes. Nevertheless, spontaneous attenuation and even complete amelioration of symptoms in early childhood and adolescence can occur in many disorders, suggesting that brain circuits possess an intrinsic capacity to overcome the deficits arising from some germline mutations. We examin…		5	x	The group has previously established a pipeline for “synaptome mapping” and, in the present study, applied the technology to apply Pax6 heterozygous mutant mice, a model for neurodevelopmental disorders. The strategy utilizes fluorescent protein-tagged knock-in mice, i.e., PSD95eGFP/eGFP and SAP102mKO2/mKO2, as well as spinning disk-microscopy to evaluate postsynaptic protein complex at the quant…	This study on synaptome mapping in Pax6 mutant mice reveals two waves of synaptome changes that are temporally deviated from normal developmental programs but eventually normalized by compensatory changes. This study uses two tagged excitatory synaptic marker proteins (PSD-95 and SAP102) and analyzes almost a trillion PSD- 95/SAP102-containing synapses. They find that the synapses with rapid prot…	The authors report and analyse a huge data set on the expression of synaptic proteins PSD95 and SAP102. These data will be of considerable interest to the whole neuroscience community. The methodology is complicated due to the many types of analyses performed, and the authors have done a good job explaining it - however, despite many readings, I failed to understand certain parts. Due to short re…	N/A		50	60	60	80	20	60			80	50	40	60	20	50			65	55	50	70	20	55
134	https://www.nature.com/articles/s41467-022-34589-8			2022-03-24	2022-10-31	221			x		E		Stephan Dietrich	M	Niccolò Zampieri	M	Molecular identity of proprioceptor subtypes innervating different muscle groups in mice	The precise execution of coordinated movements depends on proprioception, the sense of body position in space. However, the molecular underpinnings of proprioceptive neuron subtype identities are not fully understood. Here we used a single-cell transcriptomic approach to define mouse proprioceptor subtypes according to the identity of the muscle they innervate. We identified and validated molecul…		1	x	This manuscript used single cell transcriptomics to investigate the molecular identity of proprioceptors innervating different muscle groups in the body: axial muscles of the back of the trunk (epaxial), abdominal muscles (hypaxial) and limb muscles. This information is important to understand signaling involved in developing their specific connections in the periphery, as well as their central c…	In this paper the authors have identified muscle target specific markers (epaxial, limb, and hypaxial) in proprioceptors that are present before proprioceptor subtype (Ia/II/Ib) development. The authors also identified the axon guidance molecules from the ephrin-A/EphA family as important regulators of proprioceptor guidance during development. In ephrin-A5 knockout mice, increased proprioceptor …	This manuscript by Dietrich et al. described molecular heterogeneity of pSNs at two developmental stages corresponding to E15.5 and P1, from thoracic and lumbar levels. For this, the authors are using scRNAseq with Cell-seq2 method and show that DRG cells from the above regions can be clustered into known cell types and then subclustered into proprioceptive neurons clusters, which they suggest mi…	N/A		60	80	80	90	-70	30			60	60	80	90	-80	50			60	70	80	90	-75	40
136	https://www.nature.com/articles/s41467-022-34367-6			2022-02-16	2022-10-24	250			x		E		Meike Hettwer	F	Sofie Louise Valk	F	Coordinated cortical thickness alterations across six neurodevelopmental and psychiatric disorders	Neuropsychiatric disorders are increasingly conceptualized as overlapping spectra sharing multi-level neurobiological alterations. However, whether transdiagnostic cortical alterations covary in a biologically meaningful way is currently unknown. Here, we studied co-alteration networks across six neurodevelopmental and psychiatric disorders, reflecting pathological structural covariance. In 12,02…		5	x	Hettwer et all investigated the presence of coordinated cortical thickness alterations across 6 neuropsychiatric disorders using summary statistics from the ENIGMA consortium. Moreover, they contextualised their findings within patterns of organisation of the human brain, including macroscopical connectomics and transcriptomic data. The manuscript is well written and the data well presented, the …	Hettwer et al. mapped a transdiagnostic cortical thickness co-alteration network of 6 mental disorders by the aid of ENIGMA Meta-Analysis consortium. They further mapped the functional and structural epicenters of transdiagnostic cortical thickness alteration by refer to the normative functional and structural network from HCP. Then authors decomposed the co-alteration network to various transdia…	This paper examines the hypothesis that cortical alterations associated with psychiatric disorders covary in a biologically meaningful way across distinct diagnostic subgroups. This work follows on from recent studies that have investigated this hypothesis in individual diagnostic group – particularly schizophrenia. A strength of this paper is the inclusion of multiple diagnostic groups, allowing…	N/A		50	75	50	75	80	60			50	70	60	80	70	80			50	72.5	55	77.5	75	70
137	https://www.nature.com/articles/s41467-022-34509-w			2021-10-29	2022-10-27	363			x		E	64.6	Andrea Pisauro	M	Marios G. Philiastides	M	Neural implementation of computational mechanisms underlying the continuous trade-off between cooperation and competition	Social interactions evolve continuously. Sometimes we cooperate, sometimes we compete, while at other times we strategically position ourselves somewhere in between to account for the ever-changing social contexts around us. Research on social interactions often focuses on a binary dichotomy between competition and cooperation, ignoring people’s evolving shifts along a continuum. Here, we develop…		3	x	This study investigated how cooperation and competition, as conceptualized on a continuous dimension following Bayesian principles, are implemented at the neural level. The authors developed a novel task to assess cooperation and competition on a continuous dimension. By modulating the social context from cooperative to competitive, this task allowed an investigation of social prediction update a…	This manuscript tests neural computations involved in cooperative and competitive decisions. In an fMRI experiment, participants chose to cooperate more or less by moving along a one-dimensional space. Unsigned and signed prediction errors related to a partner’s cooperation were observed in distinct portions of rTPJ, whereas other brain regions encoded prediction errors (e.g., accG) or cooperatio…	This manuscript describes the results of an fMRI study in which participants engage in an extended form of the prisoner’s dilemma game aimed at exploring neural computations underlying the capacity to co-operate or compete with an opponent. The authors describe behavioral evidence that participants are sensitive to contextual manipulations that change the benefit of competing, in that they choose…	N/A		60	80	80	80	0	80			70	60	50	90	20	90			65	70	65	85	10	85
138	https://www.nature.com/articles/s41467-022-34293-7			2021-09-02	2022-10-18	411		x			A	53.9	Ying Zhao		Xinfeng Liu	M	Vascular endothelium deploys caveolin-1 to regulate oligodendrogenesis after chronic cerebral ischemia in mice	Oligovascular coupling contributes to white matter vascular homeostasis. However, little is known about the effects of oligovascular interaction on oligodendrocyte precursor cell (OPC) changes in chronic cerebral ischemia. Here, using a mouse of bilateral carotid artery stenosis, we show a gradual accumulation of OPCs on vasculature with impaired oligodendrogenesis. Mechanistically, chronic ische…		5	x	Zhao and colleagues use a number of contemporary techniques to confirm the important link between vascular abnormalities and cerebral ischemic demyelination. They identify endothelial caveolin-1 as a mediator oligodendrocyte differentiation via the release of HSP90α. Further, they identify a microRNA that acts upstream to influence the levels of caveolin-1. Overall, these findings are potentially…	In this study, Zhao et al. examined the mechanisms of cell-cell interaction between endothelium and oligodendroglia under cerebral hypoperfusion. Using in vivo (a mouse model of chronic cerebral hypoperfusion) and in vitro (endothelial cells and OPCs) system, the authors reported that under the conditions of chronic ischemic conditions, Cav-1 reduction would increase the vascular secretion of HSP…	This manuscript addresses a very interesting aspect of white matter injury upon cerebral ischemia: the role of the vasculature in regulating the generation and maturation of oligodendrocyte precursor cells upon an ischemic insult. Using a variety of in vivo and in vitro techniques the authors proposed that vascular dysfunction, in this case by the downregulation of Caveolin-1 expression in endoth…	The manuscript # NCOMMS-21-33332 entitled "Vascular endothelium deploys caveolin-1 to regulate oligodendrogenesis in chronic cerebral ischemia" addresses a critical question regarding the pathogenesis of Leukoaraiosis, a pathological appearance of the brain white matter, which has long been believed to be caused by perfusion disturbances within the arterioles perforating through the deep brain st…		50	80	70	90	50	70	70	80	60	70	50	70	60	75	50	80	55	75	60	80	55	72.5	60
139	https://www.nature.com/articles/s41467-022-34552-7			2022-04-29	2022-10-21	175			x		E		Benedikt Frieg	M	Gunnar F. Schröder	M	The 3D structure of lipidic fibrils of α-synuclein	α-synuclein misfolding and aggregation into fibrils is a common feature of α-synucleinopathies, such as Parkinson’s disease, in which α-synuclein fibrils are a characteristic hallmark of neuronal inclusions called Lewy bodies. Studies on the composition of Lewy bodies extracted postmortem from brain tissue of Parkinson’s patients revealed that lipids and membranous organelles are also a significa…		1	x	Frieg et al. present cryo-EM analysis of phospholipid-induced α-synuclein (lipid-α-syn) fibril structures, and reveal the structural basis of the interaction between lipid and α-syn in fibrillar form from the additional cryo-EM densities of on lipid-α-syn fibril together with MD simulations and ssNMR data. The authors determine six lipid-α-syn fibril complex structures. Interestingly, three L1 fi…	The manuscript describes cryo-EM structures of six α-synuclein fibril polymorphs in complex with lipids. The phospholipids are suggested to induced (some) new morphologies of the fibrils and to bind to cavities within them. The authors suggest that the structures support a mechanism of coaggregation of lipids with fibril, and to fibril-induced lipid extraction, leading to cell toxicity and pathol…	The authors of the study present 6 new cryo-electron microscopy α-synuclein fibril structures. They also support their experimental work with MD simulations. The study is well-structured, upto- date and original, and provides new insigts on lipid- α-synuclein fibril interactions that could guide future therapeutic applications for PD. However, authors should address the following questions before…	The authors present structures of alpha-synuclein fibrils prepared from in vitro incubation with phospholipids. This is highly significant work because it presents the first direct structural evidence of lipid interactions with synuclein fibrils and the structures are good quality. Some drawbacks of the study are that the lipid to protein ratios are unusually low and there are large differences a…		70	60	30	50	70	80	50	80	80	70	5	60	60	90	80	70	75	65	17.5	55	65	85	65
140	https://www.nature.com/articles/s41467-022-34419-x			2022-04-12	2022-10-21	192			x		E	31.6	Florian Krach	M	Juergen Winkler	M	An alternative splicing modulator decreases mutant HTT and improves the molecular fingerprint in Huntington’s disease patient neurons	Huntington’s disease (HD) is a neurodegenerative disorder caused by poly-Q expansion in the Huntingtin (HTT) protein. Here, we delineate elevated mutant HTT (mHTT) levels in patient-derived cells including fibroblasts and iPSC derived cortical neurons using mesoscale discovery (MSD) HTT assays. HD patients’ fibroblasts and cortical neurons recapitulate aberrant alternative splicing as a molecular…		5	x	Review for “An alternative splicing modulator decreases mutant HTT and improves the molecular fingerprint in Huntington’s disease patient neurons” Overall observations: The manuscript, as a whole, is quite interesting and represents a well-researched series of studies to understand the role of alternative splicing in both the disease pathology of HD and the mechanism-ofaction (MoA) of Branaplam. …	Huntington’s disease (HD) is a dominant, monogenic, progressive neurodegenerative disorder caused by poly-glutamine (poly-Q) expansion in the HTT protein. Branaplam (NVS-SM1, LMI070) is an orally dosed small-molecule drug that previously underwent a clinical trial for treatment of spinal muscular atrophy (SMA), although it was withdrawn after a clinical hold, and Novartis is currently exploring i…	Several approaches to lowering the levels of the huntingtin protein (HTT) are currently in clinical trials for evaluation as disease modifying treatments for Huntington’s disease (HD). This includes the small molecule splicing modulator, Branaplam, which results in the inclusion of exon 49a, leading to a frame shift, and nonsense-mediated decay of the HTT transcript. In this study, the authors ha…	N/A		80	80	50	60	60	50			80	80	50	80	10	40			80	80	50	70	35	45
141	https://www.nature.com/articles/s41467-022-34451-x			2021-08-16	2022-10-25	435	x				U		Ning Liu		Leslie G. Ungerleider	F	Bidirectional and parallel relationships in macaque face circuit revealed by fMRI and causal pharmacological inactivation	Although the presence of face patches in primate inferotemporal (IT) cortex is well established, the functional and causal relationships among these patches remain elusive. In two monkeys, muscimol was infused sequentially into each patch or pair of patches to assess their respective influence on the remaining IT face network and the amygdala, as determined using fMRI. The results revealed that a…		2	x	1. Summary The authors investigated relationship between face-selective patches in the macaque IT cortex in terms of inter-areal information flow. To reveal such relationship in a functional and causal manner, they conducted pharmacological inactivation of each face-selective patch (ML, MF, AL, and AF) while measuring BOLD responses to face or object stimuli (fMRI) in these patches. The following…	Liu et al., in a series of carefully performed experiments study the effect of inactivation of various parts of the inferior temporal face network on the rest of it. The topic and motivation of the study are very important as they reflect an ongoing metamorphosis in our understanding of cortical organization in high level visual areas. I congratulate the authors on their systematic methodical app…	This paper investigates a subset of the face patch circuitry in macaques, using reversible inactivation and fMRI. The approach and the topic are important and timely, and the results, when taken at face value, are interesting and novel. Hence, the study has the potential to be a significant contribution to the understanding of face processing in primates. But in its current form, the presentation…	N/A		0	80	60	80	10	60			20	60	80	70	50	75			10	70	70	75	30	67.5
142	https://www.nature.com/articles/s41467-022-33611-3			2021-12-22	2022-09-26	278	x				U	82.7	Sean L. Metzger	M	Edward F. Chang	M	Generalizable spelling using a speech neuroprosthesis in an individual with severe limb and vocal paralysis	Neuroprostheses have the potential to restore communication to people who cannot speak or type due to paralysis. However, it is unclear if silent attempts to speak can be used to control a communication neuroprosthesis. Here, we translated direct cortical signals in a clinical-trial participant (ClinicalTrials.gov; NCT03698149) with severe limb and vocal-tract paralysis into single letters to spe…		3	x	The manuscript aimed to demonstrate real-time, neural prosthesis-based generalizable spelling in a paralyzed person. One participant with anarthria (severe dysarthria with intact cognition) was recruited and a 128-channel ECoG was implanted in the sensorimotor cortex on the left hemisphere. A neural network was trained by imagining isolated NATO code words (representing letters) and then used to …	This is a compelling, technically impressive further demonstration that brain-to-speech approaches are feasible. In that, this paper extents and complements earlier reports by this group on (to my understanding) this patient, who thankfully continues to contribute in extraordinate ways to the field’s progress in this regard. What I am less convinced about is the uniquely new contribution this man…	N/A	N/A		80	85	70	70					80	60	40	80					80	72.5	55	75
144	https://www.nature.com/articles/s41467-022-34459-3			2021-08-10	2022-10-25	441	x				U	74.8	Jia-Hou Poh		Alison Adcock	F	Hippocampal convergence during anticipatory midbrain activation promotes subsequent memory formation	The hippocampus has been a focus of memory research since H.M’s surgery abolished his ability to form new memories, yet its mechanistic role in memory remains debated. Here, we identify a candidate memory mechanism: an anticipatory hippocampal “convergence state”, observed while awaiting valuable information, and which predicts subsequent learning. During fMRI, participants viewed trivia question…		2	x	In this interesting and novel fMRI study, the authors examine hippocampal memory encoding processes. Cirtically, the paradigm included a curiosity manipulation and the authors conclude that hippocampal 'convergence' predicts subsequent memory performance. There is much to applaud in this manuscript. This is an exciting paper with a novel proposal about hippocampal convergence as a new candidate m…	The authors quantified the similarity of BOLD patterns in the medial temporal lobe to average patterns (called “convergence”) while participants learned the answers to trivia questions. They found that convergence in the hippocampus during the presentation of questions was positively related to selfreported curiosity about the answer, later recall of the answer, and VTA univariate responses durin…	The authors used a previously established paradigm together with fMRI and a novel analysis approach to investigated the relationship between midbrain/hippocampal interaction and memory formation. As a main findings they can show that curiosity promotes memory formation, and leads to higher hippocampal convergence. Importantly, hippocampal convergence increased with midbrain activation and account…	N/A		70	80	80	90	80	100			60	80	80	70	90	90			65	80	80	80	85	95
146	https://www.nature.com/articles/s41467-022-34201-z			2021-06-09	2022-10-13	491		x			A	82.2	Woo-Hyun Cho	M	Sung Joong Lee	M	Hippocampal astrocytes modulate anxiety-like behavior	Astrocytes can affect animal behavior by regulating tripartite synaptic transmission, yet their influence on affective behavior remains largely unclear. Here we showed that hippocampal astrocyte calcium activity reflects mouse affective state during virtual elevated plus maze test using two-photon calcium imaging in vivo. Furthermore, optogenetic hippocampal astrocyte activation elevating intrace…		2	x	Cho et al. investigated how hippocampal astrocytes contribute to synaptic function that underlies anxiety behavior. The authors used conditional hGFAP-CreERT2 mouse line to target astrocytes in adult mice and found that astrocyte calcium activity appears to synchronize with anxiety states in a virtual reality environment with two-photon in vivo imaging. The authors further expressed channelrhodop…	In this paper, Choi et al describe a role for hippocampal astrocytes in anxiety-related behaviors. Using 2P imaging they first describe that hippocampal astrocytes seem to be activated around a VR maze exploration. They then manipulate astrocytes activity using a ChR2 genetic construct and show that light-induced activation of astrocytes induces anxiolytic effects and an increase in exploratory b…	The manuscript entitled “Hippocampal astrocytes modulate anxiety” by Woo-Hyaun Cho et al. provides evidence for the involvement of astrocytes in regulating the animal response to the anxiogenic environment. It is showed that upon an increase in intracellular calcium concentration, astrocytes release ATP which in turn increases the sEPSC frequency in neighboring neurons, astrocytes in both the ven…	N/A		20	80	50	70	40	70			25	75	70	80	60	80			22.5	77.5	60	75	50	75
148	https://www.nature.com/articles/s41467-022-34284-8			2022-05-17	2022-10-19	155			x		E		Basavraj Khanppnavar	M	Harald H. Sitte	M	Structural basis of organic cation transporter-3 inhibition	Organic cation transporters (OCTs) facilitate the translocation of catecholamines, drugs and xenobiotics across the plasma membrane in various tissues throughout the human body. OCT3 plays a key role in low-affinity, high-capacity uptake of monoamines in most tissues including heart, brain and liver. Its deregulation plays a role in diseases. Despite its importance, the structural basis of OCT3 f…		1	x	The manuscript entitled “Structural basis of organic cation transporter-3 inhibition” provides the first structure of an organic cation transporter. The importance of this work is indisputable; nonetheless, I have some concerns on the functional portion of the manuscript that must be addressed. To follow, some comments that might improve the overall quality of the data and of the discussion there…	OCT3 is an important pharmacological target and its dysregulation is implicated in human diseases and effects drug uptake. The authors present three cryoEM structures of the organic cation transporter OCT3 solved in the absence and presence of chemical inhibitors. The structures are consistent with the overall structural topology of other major facilitator transporters. An impressively extensive …	The manuscript by Khanppnavar et al describes the high-resolution cryo-EM structure of human OCT3 in the apo state and bound to two different inhibitors: corticosterone (CORT) and decynium-22 (D22). The structures show common features of MFS family. They incorporate modeling and molecular dynamics to build a more complete picture of the OCT3 structure. The authors also relate the functional chara…	N/A		40	60	0	100	50	80			50	75	20	60	50	50			45	67.5	10	80	50	65
149	https://www.nature.com/articles/s41467-022-34328-z			2021-09-01	2022-10-19	413	x				U		Colin Reveley	M	David A. Leopold	M	Diffusion MRI anisotropy in the cerebral cortex is determined by unmyelinated tissue features	Diffusion magnetic resonance imaging (dMRI) is commonly used to assess the tissue and cellular substructure of the human brain. In the white matter, myelinated axons are the principal neural elements that shape dMRI through the restriction of water diffusion; however, in the gray matter the relative contributions of myelinated axons and other tissue features to dMRI are poorly understood. Here we…		1	x	The paper by Reveley et al explore the cellular relevance of diffusion MRI measurements in the cortex. Before providing my review of this paper, I would like to note that over the development of diffusion MRI as a tool in neuroscience it became fixated that this method is used for white matter mapping (mainly due to fiber-tracking and its consequent mapping of white matter structure in 3D). I str…	The paper studies an important question, namely the relation between histological parameters from Nissl and Myelin stained images, and diffusion MRI data. The primary claim made in the study is that the fractional anisotropy in dMRI data correlates more strongly with a Nissl-derived anisotropy measure, rather than myelin content. The study is interesting but has significant weaknesses. 1) There i…	There has been a surge in the interest in identifying the relationship between the results obtained with non-invasive (such as in-vivo MR imaging) and invasive (e.g. various histological statings) experimental methods. Establishing these relations is essential in multiple contexts, from clinical, through experimental to computational studies. A part of this debate is establishing which specific p…	N/A		70	80	40	50	70	70			70	80	50	70	70	90			70	80	45	60	70	80
151	https://www.nature.com/articles/s41467-022-34129-4			2022-02-26	2022-10-12	228			x		E	60.1	Alexa Pichet Binette	F	Oskar Hansson	M	Amyloid-associated increases in soluble tau relate to tau aggregation rates and cognitive decline in early Alzheimer’s disease	For optimal design of anti-amyloid-β (Aβ) and anti-tau clinical trials, we need to better understand the pathophysiological cascade of Aβ- and tau-related processes. Therefore, we set out to investigate how Aβ and soluble phosphorylated tau (p-tau) relate to the accumulation of tau aggregates assessed with PET and subsequent cognitive decline across the Alzheimer’s disease (AD) continuum. Using h…		5	x	Binette et al. investigate the associations between, Aβ aggregation (Aβ PET), soluble phosphorylated tau (p-tau217), accumulation of aggregated tau (as assessed by tau PET) and cognitive decline in the AD continuum. They demonstrate that, in early AD (CU + MCI, non-demented), higher CSF p-tau217 was associated with higher Tau PET uptake, higher connectivity-mediated tau accumulation and higher co…	The authors examine associations between baseline Ab-PET and CSF p-tau217 on changes in tau-PET, connectivity-associations with changes in tau-PET and cognitive decline in participants (CU Ab-, CU Ab+, MCI Ab+, Dementia Ab+) from BIOFINDER-2 and replicated, to a degree, in ADNI. They find that CSF p-tau217 is most strongly associated with changes in tau-PET and that the association between CSF p-…	Binette et al. report longitudinal data from the BIOFINDER2 cohort. The PET and fMRI data are based on a brain parcellation atlas. fMRI connectivity is analysed using correlation analysis. CSF 217phosphotau is a predictor of connectivity-dependent increase in tau PET signal and has a stronger effect than regional amyloid PET values. This multimodal longitudinal dataset is very rich in content and…	N/A		50	80	25	60	50	70			50	80	30	80	50	50			50	80	27.5	70	50	60
153	https://www.nature.com/articles/s41467-022-34326-1			2020-05-08	2022-10-19	894	x		x			80.3	Laura Gwilliams	F	David Poeppel	M	Neural dynamics of phoneme sequences reveal position-invariant code for content and order	Speech consists of a continuously-varying acoustic signal. Yet human listeners experience it as sequences of discrete speech sounds, which are used to recognise discrete words. To examine how the human brain appropriately sequences the speech signal, we recorded two-hour magnetoencephalograms from 21 participants listening to short narratives. Our analyses show that the brain continuously encodes…		3	x	There is much to like about this study, and for a neuro-/psycholinguistic endeavour it is admirably clearly written. In essence, I have concerns as to whether it poses the advance that it aims to be. The limitations I see are the following: 1. since no task and behavioural read-out was employed, limited conclusion can be drawn on the psycholinguistic/behavioural correspondence of any of the neura…	In “Neural dynamics of phoneme sequences jointly encode invariance, content and order”, Gwilliams et al. use MEG data from participants listening to narrative stories to address how the brain processes sequences of phonemes. Using a decoding paradigm, they show that they are able to determine the phonetic content of narrative stimuli over different sliding windows, and that for any given point in…	In “Neural dynamics of phoneme sequences jointly encode invariance, content and order” Gwilliams et al decode MEG responses to reconstruct single phonemes (or their voice, place or manner of articulation) to study how phoneme sequences occurring in natural language are encoded by the brain. Their goals, as they stated them. are to investigate “how the language system (i) simultaneously processes …	The paper by Gwilliams describes a number of phoneme-decoding analyses applied to MEG recordings of continuous speech. Aspects of this paper that are done very well include (1) rigor in attempting to control for stimulus correlations both by considering a large number of features and using both forward and backward regression to attempt to partial out the contribution of different features (2) an…		30	60	70	80	70	60	10	70	0	80	50	90	40	70	0	60	15	70	60	85	55	65	5
154	https://www.nature.com/articles/s41467-022-34371-w			2022-02-08	2022-10-24	258		x			A		Chuanjun Tong		Zhifeng Liang	M	Multimodal analysis demonstrating the shaping of functional gradients in the marmoset brain	The discovery of functional gradients introduce a new perspective in understanding the cortical spectrum of intrinsic dynamics, as it captures major axes of functional connectivity in low-dimensional space. However, how functional gradients arise and dynamically vary remains poorly understood. In this study, we investigated the biological basis of functional gradients using awake resting-state fM…		3	x	Thank you for inviting me to review this manuscript by Tong and colleagues, in which the authors use gradient-based methods to analyse resting state fMRI data from awake marmoset monkeys and link the resultant low-dimensional descriptions of the data to white-matter and genetic expression maps. While this is an exciting example of the using of multimodal neuroimaging data to test hypotheses regar…	The study investigated the principal gradients of brain connectivity using multimodal data from marmosets with focusing on anatomical and neuromodulatory contributions. Briefly, the principal gradients were first computed for both functional connectivity measured by resting-state fMRI correlations and structural connectivity assessed by retrograde tracers, and they showed similar spatial topograp…	The manuscript addresses dynamic changes in functional organisation of the primate cortex, using a low dimensional account of resting state functional connectivity (“gradients”). Particularly interesting is the focus paid to the role of arousal on functional organisation. Additionally, the study attempts to calculate the contribution of structural connectivity and similarity in receptor expressio…	Tong et al. Anatomical and neuromodulatory basis of large-scale functional topography The authors combined resting-state fmri with retrograde tracing and gene expression data. They observed (i) different gradient order in monkeys, resembling findings in infants, (ii) inverted u type associations to structural connectviity, and (iii) u-shape associations to arousal level. 1) In the introduction, t…		40	60	40	60	40	80	0	0	20	80	60	70	60	70	0	80	30	70	50	65	50	75	0
155	https://www.nature.com/articles/s41467-022-34261-1			2021-12-02	2022-10-19	321	x				U	82.7	Han Chin Wang		Daniel E. Feldman	M	Tuning instability of non-columnar neurons in the salt-and-pepper whisker map in somatosensory cortex	Rodent sensory cortex contains salt-and-pepper maps of sensory features, whose structure is not fully known. Here we investigated the structure of the salt-and-pepper whisker somatotopic map among L2/3 pyramidal neurons in somatosensory cortex, in awake mice performing one-vs-all whisker discrimination. Neurons tuned for columnar (CW) and non-columnar (non-CW) whiskers were spatially intermixed, …		2	x	Wang et al investigate the whisker-specific tuning of neurons in superficial layers of primary somatosensory cortex in mice trained in a stimulus detection task. Because whisker-preference maps in L2/3 show a salt-and-pepper organization of whisker preference but L4 is dominated by its cognate whisker, the authors propose that this organization must be actively constructed by L2/3 neurons. Result…	This paper examines long term single cell responses in somatosensory cortex (whisker barrel cortex). The authors find that a large proportion of primary neurons within S1 continually change their preferred stimulus. Interfering with active whisking does not substantially change this finding. The main findings are important because they challenge a number of long-standing hypotheses about the rigi…	In this study Wang and his colleagues used 2P imaging to characterize the tuning properties of layer 2/3 neurons in the barrel cortex of awake mice, and asked how these tuning properties change over time, depend on attention, and are by whisking. They found a salt-and-paper organization of the cells, such that about 50% of cells that belong to a given barrel anatomically respond to other whiskers…	In this manuscript Wang and Colleagues carry out an elegant and well performed set of experiments to define the organisation of whisker tuning in sensory cortex, and how the spatial organisation of individual neurons with specific whisker tuning relates to the overall topographical organisation of sensory columns. The authors then go on to investigate the stability of this tuning and show that th…		0	70	80	80	80	80	80	80	0	80	80	70	80	80	80	80	0	75	80	75	80	80	80
156	https://www.nature.com/articles/s41467-022-33797-6			2021-09-02	2022-10-03	396			x		E		Jessica Gracias	F	Carl M. Sellgren	M	Cerebrospinal fluid concentration of complement component 4A is increased in first episode schizophrenia	Postsynaptic density is reduced in schizophrenia, and risk variants increasing complement component 4A (C4A) gene expression are linked to excessive synapse elimination. In two independent cohorts, we show that cerebrospinal fluid (CSF) C4A concentration is elevated in patients with first-episode psychosis (FEP) who develop schizophrenia (FEP-SCZ: median 0.41 fmol/ul [CI = 0.34–0.45], FEP-non-SCZ…		5	x	The authors have conducted a very interesting study following up on the previous results from Sekar et al., where data on in vivo protein levels have been lacking. The particular advantage of this study is the human CSF analysis, where they show differences in C4A for individuals with schizophrenia. Specific points - How sure are we that “Excessive synapse loss is a core feature of schizophrenia”…	This paper relates on very important physiopathological aspect of first episode psychosis (FEP) which is the role of complement system in psychosis, based on the hypothesis that excessive synaptic prunning induced by excessive complement activity would be one of the core mechanism underlying psychosis. The study is original, based on CSF analysis of FEP which are rare studies due to the difficult…	This is a very good study, with strong convergent evidence. The use of multiple independent cohorts to ensure reproducibility is to be lauded. One suggestion for improvement is to discuss how IL1B may be involved in synaptic pathology in (comorbid) disorders other than schizophrenia. Specifically, the work by Niculescu and colleagues (Le- Niculescu et al. 2013, Niculescu et al 2015) has identifie…	N/A		50	70	80	80	75	50			50	80	80	80	50	30			50	75	80	80	62.5	40
157	https://www.nature.com/articles/s41467-022-34283-9			2021-10-21	2022-10-11	355		x	x				Flavia Mancini	F	Ben Seymour	M	Computational and neural mechanisms of statistical pain learning	Pain invariably changes over time. These fluctuations contain statistical regularities which, in theory, could be learned by the brain to generate expectations and control responses. We demonstrate that humans learn to extract these regularities and explicitly predict the likelihood of forthcoming pain intensities in a manner consistent with optimal Bayesian inference with dynamic update of belie…		3	x	This manuscript examined the computational and neural mechanisms of temporal statistical learning in the pain experience. The authors showed that participants used Bayesian inference with the dynamic update of beliefs to predict the intensity of upcoming pain, in the absence of any external cues. The different components of the Bayesian modeling, including overall posterior probability (mean), it…	Overall this is a well conducted, methodologically interesting paper examining explicit predictions of upcoming pain. It isn’t clear to me, however, how important this is to our understanding of how pain is processed. Is it actually common for people to consciously process pain probabilities or is this more likely to be an implicit process? Isn’t it possible that the cognitive evaluations perform…	The study by Mancini and colleagues used a series of electrical stimuli to investigate the prediction of the intensity of painful stimuli in healthy subjects. Most of the participants were able to learn the likelihood of high or low-intensity stimulation. The authors used different modelling approaches to study the underlying cortical processes of this prediction. The general approach has been te…	N/A		80	90	30	70	70	90			80	60	10	50	80	80			80	75	20	60	75	85
158	https://www.nature.com/articles/s41467-022-33624-y			2020-02-17	2022-09-26	952				x	O	74.8	Lei Qian		Elizabeth J. Coulson	F	Cholinergic basal forebrain degeneration due to sleep-disordered breathing exacerbates pathology in a mouse model of Alzheimer’s disease	Although epidemiological studies indicate that sleep-disordered breathing (SDB) such as obstructive sleep apnea is a strong risk factor for the development of Alzheimer’s disease (AD), the mechanisms of the risk remain unclear. Here we developed a method of modeling SDB in mice that replicates key features of the human condition: altered breathing during sleep, sleep disruption, moderate hypoxemi…		5	x	This interesting study aimed to explore the impact of obstructive sleep apnea (OSA) combined with death of cholinergic neurons in basal brain nuclei on the progress of Alzheimer’s disease (AD) in engineered model mice carrying a mutated human beta amyloid gene and subjected to Saporin injection for destroying the p75 receptor and exacerbating the deterioration of deep cholinergic nuclei. The topi…	Qian and colleagues conduct a very interesting study using a mouse model to establish a link between sleep apnea and Alzheimer’s pathology. Two factors mediate the pathological changes: oxygen sensitive p75 neurotrophin receptor and hypoxia inducible factor 1 alpha. Sleep apnea was induced by producing cMPT neuron lesions, using UII-SAP injected directly into the LDT and intraventricularly. Oxyge…	This is a very interesting, often fascinating, study in a topical and important area of investigation. Several approaches taken employ state-of-the-art experimental techniques. Several data sets are very convincing and undoubtedly support the conclusions drawn. However, there would also appear to be some short-comings and conclusions that are over-stated and/or confusing (at least to me). I comme…	The link between obstructive sleep apnea (OSA) and Alzheimer's disease (AD) risk has been suggested by epidemiological studies for a number of years but has been hard to demonstrate in human for a number of reasons: i) the link between OSA and AD is likely bidirectional; ii) test of causality via treatment with CPAP is hard to evaluate due to the length of the clinical trials that would be needed…		60	70	70	60	80	60	70	80	50	80	60	80	60	70	80	80	55	75	65	70	70	65	75
160	https://www.nature.com/articles/s41467-022-34184-x			2022-05-24	2022-10-18	147		x			A	44.1	Hidenori Tabata	M	Kazunori Nakajima	M	Erratic and blood vessel-guided migration of astrocyte progenitors in the cerebral cortex	Astrocytes are one of the most abundant cell types in the mammalian brain. They play essential roles in synapse formation, maturation, and elimination. However, how astrocytes migrate into the gray matter to accomplish these processes is poorly understood. Here, we show that, by combinational analyses of in vitro and in vivo time-lapse observations and lineage traces, astrocyte progenitors move r…		1	x	In this study, Tabata and colleagues report novel migration modes, erratic migration and blood vesselguided migration, of astrocyte progenitors in the developing cerebral cortex. The authors also show that protoplasmic astrocytes are generated during prenatal period from these highly motile progenitors, while fibrous astrocytes are generated during postnatal period from progenitors that do not mo…	In this outstanding study, Tabata and colleagues discover a new mode of cell migration in the developing cerebral cortex, largely found only at late embryonic and early postnatal stages, where cells migrate in a meandering manner. The authors identify that these cells are astrocyte progenitor cells, and that their apparently random migration actually has an important component of chemotaxis and i…	This manuscript by Tabata and colleagues describes the results of a comprehensive investigation on the details and mechanisms underlying migration of astrocyte progenitors in the developing cerebral cortex of a mouse. The authors show that astrocyte progenitors move either irregularly or adopt blood vessel-guided migration within the developing cortex. On the mechanism of guided migration the aut…	N/A		85	80	90	80	80	100			80	90	90	80	90	70			82.5	85	90	80	85	85
163	https://www.nature.com/articles/s41467-022-34134-7			2022-01-05	2022-10-13	281	x				U		Zvi N. Roth	M	Elisha P. Merriam	F	Natural scene sampling reveals reliable coarse-scale orientation tuning in human V1	Orientation selectivity in primate visual cortex is organized into cortical columns. Since cortical columns are at a finer spatial scale than the sampling resolution of standard BOLD fMRI measurements, analysis approaches have been proposed to peer past these spatial resolution limitations. It was recently found that these methods are predominantly sensitive to stimulus vignetting - a form of sel…		3	x	While many studies have shown that fMRI voxels are tuned to orientation, there is currently some confusion in the field as to how this selectivity might arise. Some authors have pointed to stimulus confounds (‘vignetting’), others have argued that voxel-based selectivity reflects an enhanced neural response for particular orientations. The current paper addresses this debate by showing that vigne…	This study tests for the coarse-scale orientation preference of radial bias in the human visual cortex while controlling for a possible confounding factor called stimulus vignetting. The study leverages a new large-scale fMRI dataset of participants viewing natural scenes, and a Gabor pyramid model is used to estimate and predict voxel responses to about 10k images. Initial attempts to fit the da…	N/A	N/A		70	80	0	70					70	80	20	70					70	80	10	70
164	https://www.nature.com/articles/s41467-022-33828-2			2021-12-09	2022-10-05	300			x		E		Manuela Costa	F	Bryan A. Strange	M	Aversive memory formation in humans involves an amygdala-hippocampus phase code	Memory for aversive events is central to survival but can become maladaptive in psychiatric disorders. Memory enhancement for emotional events is thought to depend on amygdala modulation of hippocampal activity. However, the neural dynamics of amygdala-hippocampal communication during emotional memory encoding remain unknown. Using simultaneous intracranial recordings from both structures in huma…		3	x	Costa et al. investigated electrophysiological responses and interactions between the amygdala and hippocampus during aversive and neutral stimuli, via human intracranial recordings. A larger literature, across species, has implicated these structures in memory formation and its emotional modulation. In their study, the authors employ a standard study/test recognition paradigm, using aversive (em…	This paper investigates the oscillations in the amygdala and hippocampus during the encoding of emotional and neutral stimuli. The data comes from human subjects with intracranial depth electrodes, making it especially compelling. Subjects are run on a standard memory task that has been used in numerous other studies, so the results are relevant to a large literature. While a wide variety of anal…	The paper titled “Aversive memory formation in humans is determined by an amygdala-hippocampus phase code” sought to examine the directional connectivity of human amygdala-hippocampal interactions during aversive memory encoding. They found that emotional stimuli produce a unilateral influence from the amygdala to the hippocampus through theta oscillations and that memory for emotional stimuli de…	N/A		20	75	60	70	80	95			20	70	50	70	90	80			20	72.5	55	70	85	87.5
165	https://www.nature.com/articles/s41467-022-33883-9			2020-03-10	2022-10-06	940	x				U	58.8	Shan Shen		Andreas S. Tolias	M	Distinct organization of two cortico-cortical feedback pathways	Neocortical feedback is critical for attention, prediction, and learning. To mechanically understand its function requires deciphering its cell-type wiring. Recent studies revealed that feedback between primary motor to primary somatosensory areas in mice is disinhibitory, targeting vasoactive intestinal peptide-expressing interneurons, in addition to pyramidal cells. It is unknown whether this c…		2	x	This is a very nice study demonstrating that feedback (FB) circuits are not anatomically and functionally homogeneous across the brain. Using optogenetic stimulation of FB from either M1-to-S1 or LM-to-V1 combined with whole-cell patch recordings in S1 and M1, respectively, in mouse cortex, the authors show that these two FB pathways target different cell types and modulate excitatory neuron acti…	Shen and colleagues compared two feedback projections in the neocortex of the mouse. The first is a projection from vibrissal motor cortex (vM1) to barrel cortex (vS1), and the second is a projection from the lateral-medial extrastriate area (LM) to the primary visual cortex (V1). They used optogenetics and patch clamp recordings to map the cell type-specific strength of the feedback input. They …	Using in vitro electrophysiology and optogenetics, Shen and colleagues characterize the connectivity profiles of two intra-cortical feedback pathways. The authors show that projections from primary motor cortex (M1) in primary somatosensory cortex (S1) make stronger connections onto vasointestinal peptide (VIP), while feedback projections from the lateromedial visual area (LM) to primary visual c…	N/A		90	90	30	50	50	60			90	80	-30	20	0	50			90	85	0	35	25	55
166	https://www.nature.com/articles/s41467-022-33947-w			2020-09-09	2022-10-07	758			x		E		Paul J. Lamothe-Molina	M	Thomas G. Oertner	M	ΔFosB accumulation in hippocampal granule cells drives cFos pattern separation during spatial learning	Mice display signs of fear when neurons that express cFos during fear conditioning are artificially reactivated. This finding gave rise to the notion that cFos marks neurons that encode specific memories. Here we show that cFos expression patterns in the mouse dentate gyrus (DG) change dramatically from day to day in a water maze spatial learning paradigm, regardless of training level. Optogeneti…		2	x	This exciting manuscript by Paul J. Lamothe-Molina, Thomas G. Oertner, and colleagues uses cutting-edge viral, transgenic, and clever behavioral techniques to tease out how hippocampusmediated memories segregate over time, specifically at the level of tagged “engrams” in the dentate gyrus (DG). The authors findings are in abundance and highly influential: they provide a technically novel approach…	Lamothe-Molina et al. investigate possible roles of ensembles of cFos-expressing hippocampal dentate gyrus (DG) neurons (mostly granule cells) in spatial tasks. They use an inducible TetTag strategy to access cFos-expressing neurons in a temporally defined manner ("permanent label"), and compare these neurons to those expressing cFos in a non-conditional manner ("recent label" due to short half-l…	The manuscript by Lamothe-Molina et al characterized how active ensembles in the dentate gyrus of mice change over time, even when mice are exposed to a constant environment or subjected to the same spatial navigation task over days. The authors used TetTag mice expressing a short half-life GFP under a cFos promoter to transiently tag neurons that were active within hours prior to histological an…	N/A		90	95	0	70	30	80			85	80	0	80	50	50			87.5	87.5	0	75	40	65
167	https://www.nature.com/articles/s41467-022-34057-3			2022-02-10	2022-10-11	243		x			A	37.8	Yujie Wu		Dajun Xing	M	V1-bypassing suppression leads to direction-specific microsaccade modulation in visual coding and perception	Microsaccades play a critical role in refreshing visual information and have been shown to have direction-specific influences on human perception. However, the neural mechanisms underlying such direction-specific effects remains unknown. Here, we report the emergence of direction-specific microsaccade modulation in the middle layer of V2 but not in V1: responses of V2 neurons after microsaccades …		3	x	This interesting paper demonstrates a novel neuronal mechanism underlying the effects of microsaccades on visual perception. It describes a series of carefully-designed and well-executed experiments that will have a major impact in our understanding of the relation between eye movements and vision. The paper first demonstrates that two main areas at early stages of the visual cortical processing …	Microsaccades (MS) are a form of involuntary saccades which are smaller than 1 degree. MS have been shown to have effects on refreshing visual information. However, how MS modulates visual cortex is unclear and limited studies have shown direction specific modulation effect of MS in early visual cortex. This study investigated the MS influence on V1 and V2 neurons in macaque. Surprisingly, they f…	N/A	N/A		90	95	50	90					95	95	20	80					92.5	95	35	85
168	https://www.nature.com/articles/s41467-022-34200-0			2020-08-03	2022-10-17	805	x				U		Sasha L. Fulton	F	Ian Maze	M	Rescue of deficits by Brwd1 copy number restoration in the Ts65Dn mouse model of Down syndrome	With an incidence of ~1 in 800 births, Down syndrome (DS) is the most common chromosomal condition linked to intellectual disability worldwide. While the genetic basis of DS has been identified as a triplication of chromosome 21 (HSA21), the genes encoded from HSA21 that directly contribute to cognitive deficits remain incompletely understood. Here, we found that the HSA21-encoded chromatin effec…		5	x	This paper demonstrates that the chromatin effector Brwd1 is aberrantly elevated in Ts65Dn mice which phenocopy Down Syndrome. Genetic restoration of Brwd1 copy number rescues synaptic and cognitive defects in male mice. Additionally, targeted elevation of Brwd1 in the hippocampus enhanced neuron excitability and resulted in a loss of immediate early gene activation. Mechanistically, the authors …	In this manuscript the authors examine the gene Brwd1 as a candidate for the neurological impairments that arise in Down’s Syndrome from trisomy of chromosome 21. Multiple genes are found in the interval that is triplicated in Down Syndrome, and of those genes the functions of Brwd1 are poorly understood. The authors use the Ts65Dn model of trisomy 21 which replicates the increased copy number of…	This MS provides initial evidence for the involvement of the BRWD1 gene dosage in the phenotypic spectrum of Down syndrome. The hypothesis is that because BRWD1 maps on chromosome 21 and it is overexpressed (as expected) in triosmy 21, AND it acts as a chromatin regulator, it is a candidate gene for contributing to certain phenotypes of Down syndrome. The candidacy of BRWD1 for trisomy 21 contrib…	N/A		50	70	50	80	60	60			70	80	70	70	60	70			60	75	60	75	60	65
169	https://www.nature.com/articles/s41467-022-33514-3			2021-10-27	2022-09-20	328	x				U		Ali Ghazizadeh	M	Okihide Hikosaka	M	Salience memories formed by value, novelty and aversiveness jointly shape object responses in the prefrontal cortex and basal ganglia	Ecological fitness depends on maintaining object histories to guide future interactions. Recent evidence shows that value memory changes passive visual responses to objects in ventrolateral prefrontal cortex (vlPFC) and substantia nigra reticulata (SNr). However, it is not known whether this effect is limited to reward history and if not how cross-domain representations are organized within the s…		3	x	In this study Ghazizadeh and Hikosaka characterize the firing rate response and the correlation of firing of neurons in prefrontal cortex and substantia nigra to passively viewed stimuli that were novel or perceptually familiar or associated with Pavolivan high or low reward outcomes, aversive airpuffs time outs or bitter taste. The authors find that vlPFC neurons responded stronger to stimuli th…	This is an interesting study that sheds new light on the role of the vlPFC and the SNr in maintaining the memory of value novelty and aversiveness. However, in my opinion, the Authors should show additional evidence in order to support their hypothesis. Major Points The description of the training tasks, which is clear in their previous paper (Ghazizadeh A., et al, 2021), here is confusing and di…	Here, the authors present a paper that extends their work on object-based memories stored in corticobasal ganglia circuits to include objects that are not reward associated. I think the authors' intents here are noble, and I believe the experiments will lead to important insights, but in its current form I have several major concerns about the conceptualization and implementation of the research …	N/A		30	80	20	80	-50	40			10	70	50	80	-40	50			20	75	35	80	-45	45
173	https://www.nature.com/articles/s41467-022-33819-3			2022-03-20	2022-10-04	198	x				U		Young Rae Ji		Doris K. Wu	F	Function of bidirectional sensitivity in the otolith organs established by transcription factor Emx2	Otolith organs of the inner ear are innervated by two parallel afferent projections to the brainstem and cerebellum. These innervations were proposed to segregate across the line of polarity reversal (LPR) within each otolith organ, which divides the organ into two regions of hair cells (HC) with opposite stereociliary orientation. The relationship and functional significance of these anatomical …		1	x	This paper reports interesting and compelling data that enhance our understanding of how information is encoded by the vestibular system. We use our vestibular system to sense head position as we move through the world. Despite its critical importance, we still lack basic information about the logic of circuit organization and function as information flows from the peripheral sensory organs (the …	The manuscript by Ji et al. investigates the role of the transcription factor Emx2 in innervation patterns and bidirectional sensitivity in the mouse utricular and saccular maculae. Previous studies have shown that Emx2 expression demarcates the LPR and generates mirror-image hair cell orientation across the LPR. Combining conditional Emx2 loss- and gain-of-function mutants, retrograde tracing an…	In this manuscript by Rae Ji et al the authors report the role that the transcription factor Emx2 plays in guiding the innervation of the mouse utricle and saccule and the functional consequences of disrupting afferent signaling to the cerebellum on vestibular function. Manuscript is centered upon an anatomical organization of the vestibular maculae that is a line of polarity reversal separating …	N/A		80	90	80	70	50	70			80	80	50	75	50	80			80	85	65	72.5	50	75
174	https://www.nature.com/articles/s41467-022-34084-0			2021-08-11	2022-10-11	426		x			A		Wenyi Zhang		Tianming Yang	M	Reward salience but not spatial attention dominates the value representation in the orbitofrontal cortex	The orbitofrontal cortex (OFC) encodes value and plays a key role in value-based decision-making. However, the attentional modulation of the OFC’s value encoding is poorly understood. We trained two monkeys to detect a luminance change at a cued location between a pair of visual stimuli, which were over-trained pictures associated with different amounts of juice reward and, thus, different reward…		3	x	Zhang et al describe behavior of two monkeys, and neural activity in both LPFC and OFC, performing an attentional task. The monkeys perform well the task by paying attention to the cued locations and by being faster in valid trials. Consistent with previous results, LPFC activity is strongly modulated by attention. However, surprisingly, OFC single-neuron activity is very weakly modulated by atte…	The manuscript by Zhang, Xie and Yang investigates the representation of reward and spatial attention in two regions of the frontal cortex: the lateral prefrontal cortex (LFPC) and the orbitofrontal cortex (OFC). The authors use a beautiful paradigm with cues that signal a cue for the required timing of a stereotypical eye movement and additional shape cues that signal the amount of reward that c…	It is well established that neural activity in the orbitofrontal cortex tracks the value of predictive stimuli. The current experiment tests whether this value coding is controlled by top-down attentional mechanisms or by the salience (learned value) of stimuli. Two monkeys were trained on a Posner-like task in which they had to respond to a luminance change in either of two stimuli presented on …	N/A		60	80	40	70	10	60			80	80	50	80	0	80			70	80	45	75	5	70
175	https://www.nature.com/articles/s41467-022-33580-7			2021-04-21	2022-09-22	519	x				U		Tina T. Liu	F	Elisha P. Merriam	F	Layer-specific, retinotopically-diffuse modulation in human visual cortex in response to viewing emotionally expressive faces	Viewing faces that are perceived as emotionally expressive evokes enhanced neural responses in multiple brain regions, a phenomenon thought to depend critically on the amygdala. This emotion-related modulation is evident even in primary visual cortex (V1), providing a potential neural substrate by which emotionally salient stimuli can affect perception. How does emotional valence information, com…		3	x	This study investigates the cortical depth specificity of emotional faces (fearful, neutral, and happy) in humans using VASO contrast at 7T. In addition, using the same stimuli, at 3T and 7T, BOLD signal activation across many areas (visual cortex, amygdala) were measured. It was found that the VASO contrast differences related to facial valence was largest in superficial depths in early visual c…	The authors investigated the valence effect (VE) in human primary visual cortex using VASO and BOLD fMRI. They derived a measure of VE at a cortical-depth dependent level as well at a retinotopic level. Results indicate a cortical-depth dependent specificity of VE as well as a diffuse retinotopic effect, suggesting that valence information is processed in the amygdala and fed back to early visual…	This study is well described, and uses novel acquisition and painstaking analysis approaches to address an interesting research question. I am unable to assess the reliability of the VASO technique to identify layer-specific activity, but the results are credible, despite the small sample of 10 subjects. The primary concern I have with this paper is the unqualified premise that V1 is enhanced by …	N/A		20	70	50	80	50	80			5	80	60	80	50	75			12.5	75	55	80	50	77.5
176	https://www.nature.com/articles/s41467-022-33835-3			2021-10-08	2022-09-30	357			x		E		David Alarcón-Alarcón	M	Antonio Ferrer-Montiel	M	TRPM8 contributes to sex dimorphism by promoting recovery of normal sensitivity in a mouse model of chronic migraine	TRPA1 and TRPM8 are transient receptor potential channels expressed in trigeminal neurons that are related to pathophysiology in migraine models. Here we use a mouse model of nitroglycerine-induced chronic migraine that displays a sexually dimorphic phenotype, characterized by mechanical hypersensitivity that develops in males and females, and is persistent up to day 20 in female mice, but disapp…		5	x	In this manuscript the Authors investigated the involvement of TRPA1 and TRPM8 in migraine pain and sexual dimorphism by using chronic and intermittent treatment with nitroglycerin (NTG) as a pre-clinical model of migraine. The key findings show that TRPM8, but not TRPA1, channels are involved in the sexual dimorphism observed in mechanical hypersensitivity induced by chronic NTG injection. It is…	This is an extremely interesting study linking the resistance of male mice to chronic mechanical hypersensitivity to the agonist action of testosterone on the cation channel TRPM8. The results shed light on the mechanisms underlying the sexual dimorphism of chronic migraine are are therefore of wide interest. I have a number of comments that may serve to improve the quality of the manuscript. 1.-…	Using mouse behavior and calcium imaging experiments, the authors put forth the concept that women experience more severe migraines than men because testosterone binding to TRPM8 has a pain-relieving effect. This work has clearly demonstrated that the presence of TRPA1 contributes to hypersensitivity and the presence of TRPM8 contributes to reduced hypersensitivity in mice that have been administ…	N/A		40	70	70	90	0	60			40	70	80	70	0	70			40	70	75	80	0	65
177	https://www.nature.com/articles/s41467-022-33942-1			2021-04-27	2022-10-07	528	x				U	43.9	Amirsaman Sajad	M	Jeffrey D. Schall	M	Functional architecture of executive control and associated event-related potentials in macaques	The medial frontal cortex (MFC) enables executive control by monitoring relevant information and using it to adapt behavior. In macaques performing a saccade countermanding (stop-signal) task, we simultaneously recorded electrical potentials over MFC and neural spiking across all layers of the supplementary eye field (SEF). We report the laminar organization of neurons enabling executive control …		3	x	The manuscript by Sajad and colleagues describes a study in which the authors sought to extend existing knowledge of the contribution of supplementary eye fields (SEF) to performance monitoring and adaptive control by carrying out laminar recordings during a modified version of the well-studied saccade countermanding paradigm to characterize the response properties of single SEF neurons across co…	The authors recorded EEG and neural spiking over and in the supplementary eye field (SEF) of macaques during a saccade countermanding task, to better understand the neural circuitry and laminar structure that implements executive control and eventually broadcasts event-related potentials (ERPs) to the brain surface. They found functionally different neuronal groups important for various task elem…	This paper is an important step toward a better understanding of cortical microcircuitry involved in executive control. As a continued effort to dissect laminar organization of medial frontal cortex during stop-signal task (Sajdad et al., Nat. Neuro. 2019), this paper focused on more critical trial types (canceled) and task epochs (around SSRT) and found interesting functional dissociations acros…	N/A		90	80	50	80	75	80			90	90	50	70	70	80			90	85	50	75	72.5	80
178	https://www.nature.com/articles/s41467-022-33843-3			2022-04-04	2022-10-05	184		x			A		Kuikui Zhou		Yingjie Zhu	M	Reward and aversion processing by input-defined parallel nucleus accumbens circuits in mice	The nucleus accumbens (NAc) is critical in mediating reward seeking and is also involved in negative emotion processing, but the cellular and circuitry mechanisms underlying such opposing behaviors remain elusive. Here, using the recently developed AAV1-mediated anterograde transsynaptic tagging technique in mice, we show that NAc neurons receiving basolateral amygdala inputs (NAcBLA) promote pos…		2	x	The authors report findings from an impressive series of experiments examining how different populations of nucleus accumbens (NAc) neurons that receive input from either the basolateral amygdala (BLA) or PV thalamus regulate appetitive vs aversively motivated behaviors, and how activation of these distinct cell groups exert their effect via different projection pathways. In general, NAc neurons …	The manuscript applies sophisticated approaches to investigate whether BLA and PVT inputs to the NAc differentially control reward and aversion. The approaches are state-of-the-art and involve anatomical, electrophysiological, and behavioral methods. The methods rely heavily on AAV-mediated transsynaptic tagging for many of the experiments supporting that the BLA and PVT largely synapse on a sepa…	This interesting study from Zhou et al uses an anterograde tracing and optogenetics approach to study the roles of distinct NAc neuron subpopulations in behavior. They find that NAc neurons receiving inputs from BLA are important for positive reinforcement while those receiving inputs from PVT mediate aversive behaviors. The circuit tracing is well-performed and included a nice experiment using C…	N/A		80	90	30	60	80	80			70	80	0	50	90	80			75	85	15	55	85	80
179	https://www.nature.com/articles/s41467-022-34018-w			2021-11-04	2022-10-11	341	x				U		Julio I. Chapeton	M	Kareem A. Zaghloul	M	Micro-scale functional modules in the human temporal lobe	The sensory cortices of many mammals are often organized into modules in the form of cortical columns, yet whether modular organization at this spatial scale is a general property of the human neocortex is unknown. The strongest evidence for modularity arises when measures of connectivity, structure, and function converge. Here we use microelectrode recordings in humans to examine functional conn…		3	x	In this report, Chapeton et al. aimed to address a fascinating open question in the field of system neuroscience, namely if there is a modular organization in higher association cortices akin to the one observed in primary sensory cortices. They measured a combination of local field potentials (LFPs) and neuronal firing rates using microelectrode arrays (MEAs) implanted in the middle temporal gyr…	The manuscript presents results from functional connectivity (FC) and graph theoretical analyses of neurophysiological data measured in the human temporal cortex of patients using intracranial microelectrode recordings. The results highlight a spatial modular organisation in temporal graphs constructed from FC metrics. These modules are temporally persistent and spatially compact, approximately 1…	The authors utilized microelectrode array recordings in the human anterior lobe cortex to examine whether electrodes clustered into spatially contiguous functional modules. They found that, based on local field potential (LFPs) activity recorded during various cognitive tasks, electrodes could be clustered into modules of ~1.3mm diameter size. They further found that neurons within these LFP-defi…	N/A		85	90	-50	40	80	90			80	70	-50	0	80	90			82.5	80	-50	20	80	90
181	https://www.nature.com/articles/s41467-022-34005-1			2022-02-03	2022-10-10	249	x				U	74.5	Hannah Drew Rickner	F	Christine S. Cheng	F	Single cell transcriptomic profiling of a neuron-astrocyte assembloid tauopathy model	The use of iPSC derived brain organoid models to study neurodegenerative disease has been hampered by a lack of systems that accurately and expeditiously recapitulate pathogenesis in the context of neuron-glial interactions. Here we report development of a system, termed AstTau, which propagates toxic human tau oligomers in iPSC derived neuron-astrocyte assembloids. The AstTau system develops muc…		5	x	Rickner and Jiang et al. developed a 3D model relevant to neurodegeneration observed in AD. The model is based on a previously published study that the authors have cited where neurons and astrocytes were differentiated from human iPSC, and then cocultured in 3D. The authors implemented this model by differentiating neurons using NGN2 induction in neural progenitors. Astrocytes were differentiate…	This manuscript by Rickner et al. describes the generation of a novel 3D neuronastrocyte co-culture system for investigating tauopathies (AstTau). The authors demonstrate that these cultures, when seeded with mouse brain homogenate overexpressing 4R1N P301S human Tau, are capable of developing pathology seen in tauopathies. These pathologies include the presence of tau fibrils and oligomers as we…	N/A	N/A		5	65	50	80					20	70	80	70					12.5	67.5	65	75
182	https://www.nature.com/articles/s41467-022-33332-7			2021-02-08	2022-09-13	582	x				U		Katharina E. Meijboom	F	Christian Mueller	M	CRISPR/Cas9-mediated excision of ALS/FTD-causing hexanucleotide repeat expansion in C9ORF72 rescues major disease mechanisms in vivo and in vitro	A GGGGCC24+ hexanucleotide repeat expansion (HRE) in the C9ORF72 gene is the most common genetic cause of amyotrophic lateral sclerosis (ALS) and frontotemporal dementia (FTD), fatal neurodegenerative diseases with no cure or approved treatments that substantially slow disease progression or extend survival. Mechanistic underpinnings of neuronal death include C9ORF72 haploinsufficiency, sequestra…		5	x	This is a review of the manuscript by Meijboom et al entitled “CRISPR/Cas9-Mediated Excision of ALS/FTD-Causing Hexanucleotide Repeat Expansion in C9ORF72rescues major disease mechanisms in vivo and in vitro”. Hexanucleotide repeat expansions in the C9ORF72 gene are the most frequent cause of familial ALS and FTD, and there are no current treatments for affected patients. Here the authors employ …	Meijboom et al developed AAVs to excise the pathogenic repeat expansion in C9orf72 models using CRISPR. The validated their approach in primary neurons, iPSC models and most importantly, also directly in two different BAC transgenic mouse models. This could be a very interesting therapeutic option in the future. The manuscript is well written and the data seems solid. For publication in Nat Comm …	In the manuscript by Meijboom KE et al., the authors used CRISPR-Cas9 system to excise expanded hexanucleotide repeats in C9ORF72 gene responsible for ALS/FTD. They demonstrated successful editing of this locus in various cellular models (human and mouse), brain organoids as well as in three mouse models. As a result the RNA foci and toxic polypeptides were reduced, and the transcript and protein…	N/A		80	80	80	80	50	75			70	50	60	80	60	50			75	65	70	80	55	62.5
183	https://www.nature.com/articles/s41467-022-34039-5			2022-03-04	2022-10-11	221			x		E		Thibault Cholvin	M	Marlene Bartos	F	Hemisphere-specific spatial representation by hippocampal granule cells	The dentate gyrus (DG) output plays a key role in the emergence of spatial and contextual map representation within the hippocampus during learning. Differences in neuronal network activity have been observed between left and right CA1-3 areas, implying lateralization in spatial coding properties. Whether bilateral differences of DG granule cell (GC) assemblies encoding spatial and contextual inf…		1	x	In this work, Cholvin and Bartos compared spatial coding properties of dentate gyrus granule cells (GCs) across brain hemispheres in mice running head-fixed. Using 2-photon calcium imaging, they were able to record large populations of GCs while mice run in familiar or novel virtual linear tracks across several days. The main finding reported is that both, spatial coding of the same track and dis…	In this study, Cholvin & Bartos uses 2-photons calcium imaging and an alternance of familiar and novel virtual tracks to investigate inter-hemispheric differences of the dentate gyrus spatial code. Place cells show on average higher spatial tuning, spatial reliability and context discrimination in the left than in the right DG. Accordingly, place and context are better decoded by population activ…	The authors have previously shown that granule cells (GCs) in the mouse dentate gyrus (DG) can both discriminate between and generalise across different contexts (Chauvin et al., Neuron 2021). Here they report that these functions are lateralized such that left GCs are biased towards discrimination and right GCs are biased towards generalization. This suggests that there is an hemispheric asymmet…	N/A		80	80	70	80	50	60			70	80	80	70	50	70			75	80	75	75	50	65
184	https://www.nature.com/articles/s41467-022-34017-x			2021-09-22	2022-10-11	384		x			A	85.3	Haon Futamata		Osamu Nureki	M	Cryo-EM structures of thermostabilized prestin provide mechanistic insights underlying outer hair cell electromotility	Outer hair cell elecromotility, driven by prestin, is essential for mammalian cochlear amplification. Here, we report the cryo-EM structures of thermostabilized prestin (PresTS), complexed with chloride, sulfate, or salicylate at 3.52-3.63 Å resolutions. The central positively-charged cavity allows flexible binding of various anion species, which likely accounts for the known distinct modulations…		1	x	This manuscript is the fourth in a burst of papers describing cryo-EM structures of SCL26A5, or prestin, the piezoelectric-like actuator protein of auditory outer hair cells that drives cochlear amplification in mammals. Experimental structures of this protein have been awaited eagerly, to provide the basis for understanding the seemingly unique electromechanical behavior. The structures presente…	Futamata et al. present the cryo-EM structures of a thermostabilized version of prestin, the cochlear amplifier, with bound chloride, sulfate and salicylate anions. Mechanistic insights into prestin function are provided. The contribution is important, but suffers from the very recent publication by Ge et al. (2021), Cell from the Gouaux group. Major points: - Lines 269-270: Sentence “About 40% o…	In this study a thermostabilized Prestin variant is studied by cryo-EM and corresponding functional assays. The authors present structures of Prestin bound to chloride, sulfate and salicylate. They identify residues important for binding of chloride and sulfate, and for inhibition by salicylate. The study is nicely carried out, well written and interesting. Their EM data is convincing, and conclu…	This paper presents three cryo-EM structure of human prestin (using a thermostabilized mutant): a Clbound structure at 3.52 Å resolution, a sulfate (SO4^2-) bound structure (3.52 Å), and a salicylate bound structure (3.57 Å). The thermostabilized protein does not show the NLC (non linear conductance) typical for active prestin so the protein structure is that of a non-functional or inhibited pres…		20	60	50	100	60	70	-20	60	-30	60	10	70	60	80	-20	80	-5	60	30	85	60	75	-20
185	https://www.nature.com/articles/s41467-022-33967-6			2021-01-22	2022-10-07	623	x				U	74.6	Jane S. Huang	F	Claire E. J. Cheetham	F	Immature olfactory sensory neurons provide behaviourally relevant sensory input to the olfactory bulb	Postnatal neurogenesis provides an opportunity to understand how newborn neurons integrate into circuits to restore function. Newborn olfactory sensory neurons (OSNs) wire into highly organized olfactory bulb (OB) circuits throughout life, enabling lifelong plasticity and regeneration. Immature OSNs form functional synapses capable of evoking firing in OB projection neurons but what contribution,…		2	x	In this study combining in vivo 2-photon calcium imaging, slice electrophysiology coupled with optogenetics and behavioral tests, Jane Huang and colleagues examined the contribution of immature olfactory sensory neurons (OSNs) in odor processing. This is an interesting question because OSNs are continuously renewed throughout life. Thus, newly generated OSNs have to integrate a pre-existing netwo…	In the manuscript by Huang et al., the authors implement diverse genetic, imaging, electrophysiological, and behavioral tools to thoroughly investigate the tuning and connectivity of immature OSNs, alongside the sufficiency of immature OSNs to influence olfactory guided behavior. The main findings that immature OSNs are odor selective and sufficient for detection and discrimination behaviors are …	The manuscript by Huang et al provides important new insights into the contribution of immature olfactory sensory neurons to functional signaling in the olfactory bulb. The experiments are, in general, well executed. This manuscript does provide one of the most comprehensive examinations of the dynamics and contributions of the regenerative process in olfactory signaling since it combines morphol…	N/A		60	50	70	80	60	60			60	80	50	70	60	80			60	65	60	75	60	70
186	https://www.nature.com/articles/s41467-022-34021-1			2022-01-19	2022-10-11	265	x				U		Jasmin A. Strickland	F	Michael A. McDannald	M	Brainstem networks construct threat probability and prediction error from neuronal building blocks	When faced with potential threat we must estimate its probability, respond advantageously, and leverage experience to update future estimates. Threat estimation is the proposed domain of the forebrain, while behaviour is elicited by the brainstem. Yet, the brainstem is also a source of prediction error, a learning signal to acquire and update threat estimates. Neuropixels probes allowed us to rec…		2	x	This manuscript examines single unit spiking activity in the rat brainstem in order to address the question of whether and how the brainstem may be involved in threat assessment and prediction. Briefly, traditional interpretations of how the brain responds to threats have suggested that the forebrain and neocortex are primarily responsible for assessing threat probability and prediction error, wh…	This is an interesting study describing the role of brainstem in construction of threat probability, behaviour, and prediction error. To this end the authors used neuropixels probes to record single-unit activity across a 21-region brainstem axis during probabilistic fear discrimination. They identified a dorsally-based brainstem network rapidly signaled threat probability. The article is clear a…	N/A	N/A		50	70	60	70					25	75	50	60					37.5	72.5	55	65
187	https://www.nature.com/articles/s41467-022-33161-8			2020-05-03	2022-09-06	856	x				U	80.3	Serra E. Favila	F	Jonathan Winawer	M	Perception and memory have distinct spatial tuning properties in human visual cortex	Reactivation of earlier perceptual activity is thought to underlie long-term memory recall. Despite evidence for this view, it is unclear whether mnemonic activity exhibits the same tuning properties as feedforward perceptual activity. Here, we leverage population receptive field models to parameterize fMRI activity in human visual cortex during spatial memory retrieval. Though retinotopic organi…		3	x	The study reported in this manuscript uses fMRI together with population receptive field (pRF) modeling to investigate the spatial tuning properties of different visual cortical regions (V1, V2, V3, V3ab, hV4, LO) when recalling visual stimuli from memory, compared with perceiving the same stimuli. The central claims of the paper are that (i) memory responses in all regions accurately reflect the…	This is a well written manuscript and technically rigorous study. The authors use fMRI and pRF mapping to assess the amplitude and spatial precision of responses in retinotopic visual cortex for perception and memory. The main finding is that responses decrease in precision when ascending the visual hierarchy for perception, whereas memory (or imagery) leads to broadly tuned responses that are qu…	This is a well-written and well-structured paper, with a clear progression through the data, hypotheses, and models. The authors manage to make sophisticated modeling methods appear straightforward and readily comprehensible. Overall, I only have one major concern, and I’m not even sure this concern would invalidate the final conclusion of the paper – that differences between sensory and memory r…	N/A		75	70	80	80	70	70			70	80	70	90	60	80			72.5	75	75	85	65	75
188	https://www.nature.com/articles/s41467-022-33587-0			2021-06-01	2022-09-22	478	x				U		Gray Umbach	M	Bradley Lega	M	Flexibility of functional neuronal assemblies supports human memory	Episodic memories, or consciously accessible memories of unique events, represent a key aspect of human cognition. Evidence from rodent models suggests that the neural representation of these complex memories requires cooperative firing of groups of neurons on short time scales, organized by gamma oscillations. These co-firing groups, termed “neuronal assemblies,” represent a fundamental neurophy…		3	x	In the paper entitled “Flexibility of functional assemblies supports human memory”, the authors used data from refractory epileptic patients to investigate the role of gamma activity in different brain structures during memory task. The paper is very interesting. Main novelty resides in using advanced methods for unit activity inherited from animal research in human subjects performing a memory t…	Umbach et al. studied hippocampal neural firing pattern in relation to gamma phase in a free recall task, using human cell data. They showed 25 ms assemblies reflect consistent sequences within gamma oscillations and phase locking. The data is rare and interesting. But the function wrt. gamma oscillation remains elusive. For example, what is the function of phase locking, does it relate to autoas…	The authors investigated single-unit recordings in epilepsy patients performing a word memorization task with free recall. They describe the contribution of co-firing groups of neurons and local field potentials in the medial temporal lobe to memory formation. Their findings suggest that neuronal assemblies exhibiting correlated firing on a 25 ms timescale and spike-field coupling in the gamma ra…	N/A		50	60	-30	50	50	80			60	60	-20	40	50	70			55	60	-25	45	50	75
189	https://www.nature.com/articles/s41467-022-33876-8			2021-10-08	2022-10-04	361			x		E	60.1	Lavanya Moparthi	F	Peter M. Zygmunt	M	The human TRPA1 intrinsic cold and heat sensitivity involves separate channel structures beyond the N-ARD domain	TRP channels sense temperatures ranging from noxious cold to noxious heat. Whether specialized TRP thermosensor modules exist and how they control channel pore gating is unknown. We studied purified human TRPA1 (hTRPA1) truncated proteins to gain insight into the temperature gating of hTRPA1. In patch-clamp bilayer recordings, ∆1–688 hTRPA1, without the N-terminal ankyrin repeat domain (N-ARD), w…		1	x	In this manuscript, Moparthi et al. study the mechanisms underlying temperaturedependent gating of the cation channel TRPA1. In a first part, they use truncated versions of the channel reconstituted into lipid bilayers or studied in isolation in a tryptophan fluorescence assay, whereas in the second part, they study wild type channels and specific point mutations after expression in HEK293 cells.…	In the manuscript the authors aim to unravel the contribution of different domains to cold and heat thermo-sensitivity of human TRPA1. To this end, two truncated variants were constructred: removal of ankyrin repeats and pre-S1 domain, D1-688 (which was studied before already), and additionally removal of the voltage-sensor like domain, VSLD, in D1- 854). These were purified and their function st…	In this manuscript, Moparthi et al. studied the role of different structural domains in the temperature sensitivity of TRPA1. The authors claim that the heat sensitivity of TRPA1 is dependent on the VSLD and CTD and the cold sensitivity is dependent on the CTD and pore domain. In general, these findings are quite interesting and new. However, from my point of view, several flaws hinder this manus…	N/A		0	50	0	80	-10	70			-10	30	10	80	-50	50			-5	40	5	80	-30	60
190	https://www.nature.com/articles/s41467-022-33565-6			2020-10-14	2022-09-22	708			x		E		Céline D. Dürst	F	Thomas G. Oertner	M	Vesicular release probability sets the strength of individual Schaffer collateral synapses	Information processing in the brain is controlled by quantal release of neurotransmitters, a tightly regulated process. From ultrastructural analysis, it is known that presynaptic boutons along single axons differ in the number of vesicles docked at the active zone. It is not clear whether the probability of these vesicles to get released (pves) is homogenous or also varies between individual bou…		1	x	A quantitative description of neurotransmitter release was originally developed by Katz using the frog neuromuscular junction as a model system, in the 1950s. Since then, a number of groups have estimated the quantal parameters N, Pr/Pv, and q at peripheral and central synapses. As the authors mention in their introduction, there are a number of limitations to keep in mind when attempting to deri…	The authors investigate vesicle release and quantal parameters at CA3-CA1 synapses in organotypic hippocampal slice cultures using the glutamate sensor iGluSnFR. They show that: most Schaffer collateral boutons have a single active zone; release is confined to the AZ; under low Pves mainly a single vesicle is released whereas under high Pves multivesicular release occurs; and Pves is variable amo…	This work is a technical tour de force to cherish. Particularly notable are the careful controls and internal measures of consistency, which vouch the major technical advances. It is clear that the work reports both uniquantal and multiquantal release from the same terminals, a real breakthrough. The main figures represent a remarkable series of observations that provide clear answers to long sta…	N/A		50	80	50	70	85	90			50	90	50	70	80	90			50	85	50	70	82.5	90
191	https://www.nature.com/articles/s41467-022-33836-2			2021-11-23	2022-09-30	311		x			A		Fangying Zhao	F	Li Li		Brain milieu induces early microglial maturation through the BAX-Notch axis	Microglia are derived from primitive myeloid cells and gain their early identity in the embryonic brains. However, the mechanism by which the brain milieu confers microglial maturation signature remains elusive. Here, we demonstrate that the baxcq55 zebrafish and Baxtm1Sjk mouse embryos exhibit similarly defective early microglial maturation. BAX, a typical pro-apoptotic factor, is highly enriche…		1	x	I am an expert in microglia development, ontogeny, and identity (and not a zebrafish biologist), and will focus on these topics. Here, Zhao and colleagues use mainly zebrafish to study interactions between primitive macrophages and neurons early in embryonic development. Their major claim is that a neuronal bax-CamkII-CREBnotch signaling axis confers microglial identity, and the central concern (…	The manuscript presents a previously unidentified communication between developing neurons and microglial progenitors that controls microglial differentiation. This communication is defined in remarkable detail through well-designed genetic and pharmacologic experiments in zebrafish and mice. The manuscript demonstrates that BAX protein expressed in neurons controls neuronal signaling to microgli…	In this manuscript, Zhao et al identify neuronal Delta/Dlb as a novel signal that regulates microglia differentiation. The authors rigorously show that Delta is induced downstream of neuronal activity in a Bax/CAMKII/CREB-dependent manner. Thus, the authors uncouple the role of Bax in promoting neuronal apoptosis— which initially attracts microglia to the nervous system— from a newly identified r…	N/A		10	80	80	70	80	80			0	80	70	70	70	80			5	80	75	70	75	80
192	https://www.nature.com/articles/s41467-022-33885-7			2021-11-05	2022-10-06	335			x		E	98.8	Mary-Ellen Lynall	F	Ed Bullmore	M	Genetic variants associated with psychiatric disorders are enriched at epigenetically active sites in lymphoid cells	Multiple psychiatric disorders have been associated with abnormalities in both the innate and adaptive immune systems. The role of these abnormalities in pathogenesis, and whether they are driven by psychiatric risk variants, remains unclear. We test for enrichment of GWAS variants associated with multiple psychiatric disorders (cross-disorder or trans-diagnostic risk), or 5 specific disorders (c…		5	x	In this manuscript, the authors explore whether genetic variants associated with risk for neuropsychiatric are enriched within regulatory elements, relevant in immune cells. The authors find, that variants associated with cross-disorder psychiatric risk as well as those associated with schizophrenia and depression are enriched in active regulatory elements of brain as well as independently of lym…	In general, I found this to be a well-written, well planned out analysis that integrated a number of publicly available datasets with established bioinformatics methods to test the hypothesis that genetic risk factors for psychiatric disorders act, in part, via immune cell types. The results are very compelling and presented in some detail. There are a lot of analyses and it can be challenging to…	N/A	N/A		70	80	50	80					80	90	60	80					75	85	55	80
193	https://www.nature.com/articles/s41467-022-33781-0			2022-05-23	2022-09-30	130	x				U	93.2	Weidong Feng	M	Paschalis Kratsios	M	Maintenance of neurotransmitter identity by Hox proteins through a homeostatic mechanism	Hox transcription factors play fundamental roles during early patterning, but they are also expressed continuously, from embryonic stages through adulthood, in the nervous system. However, the functional significance of their sustained expression remains unclear. In C. elegans motor neurons (MNs), we find that LIN-39 (Scr/Dfd/Hox4-5) is continuously required during post-embryonic life to maintain…		1	x	This study investigates the functional relevance of sustained expression of Hox transcription factors in adult neurons in the ventral cord of C. elegans. It was previously observed that neuronal Hox protein expression persists in to adulthood, but its functional significance has not been thoroughly investigated. This paper demonstrates that this extended expression of the Hox transcription factor…	In this work Feng et al. expand on previous work from the group (mainly Feng eLife 2020) to further characterize the gene regulatory networks that establish and maintain motorneuron identity in C. elegans. Previous work from the authors showed that hox LIN-39 and MAB-5 are required to induce and maintain expression of cholinergic Motorneuron (MN) terminal identity genes, this observation is now e…	In the study by Feng et al., the authors characterize the gene regulatory networks involved in the maintenance of cholinergic neuron identity in C elegans. The authors examined the role of two Hox transcription factors, LIN-39 and MAB-5, in regulating cholinergic pathways genes in mature motoneurons. They provide evidence that these factors are required to maintain cholinergic gene expression in …	N/A		80	80	70	70	50	80			80	90	70	80	50	80			80	85	70	75	50	80
194	https://www.nature.com/articles/s41467-022-33799-4			2021-11-19	2022-09-30	315			x		E	33.8	Noemie Vilallongue	F	Homaira Nawabi	F	Guidance landscapes unveiled by quantitative proteomics to control reinnervation in adult visual system	In the injured adult central nervous system (CNS), activation of pro-growth molecular pathways in neurons leads to long-distance regeneration. However, most regenerative fibers display guidance defects, which prevent reinnervation and functional recovery. Therefore, the molecular characterization of the proper target regions of regenerative axons is essential to uncover the modalities of adult re…		1	x	This is an important work but needs improvements to bolster its potential impact. The authors performed mass-spectrometry based proteomics to uncover the proteomes of major nuclei of the adult mouse visual system. They demonstrate that expression of specific proteins is modulated by optic nerve crush, compared to uninjured. Consistent with previous reports, the authors show that one specific prot…	In a previous paper of which they were co-first authors, Belin, Nawabi and colleagues used a proteomic method to analyze effects of axotomy on retinal ganglion cells (RGCs) (Belin et al., 2015). Here they use a similar method to profile four target areas of RGCs – dorsal and ventral lateral geniculate (dLGN, vLGN), superior colliculus and suprachiasmatic nucleus – as well as an intermediate targe…	To address the yet unsolved problem of insufficient re-innervation and functional recovery of nerves in the central nervous system after injury, Vilallongue and colleagues generated and analyzed a rich proteomic data set for regenerative axons. The work is following a clear rationale and is definitely technically sound. The authors analyzed the proteomes of four different regions in the murine br…	N/A		40	50	-30	30	80	90			30	70	0	60	80	80			35	60	-15	45	80	85
197	https://www.nature.com/articles/s41467-022-33237-5			2021-10-11	2022-09-08	332			x		E	71.1	Anne E. Urai	F	Tobias H. Donner	M	Persistent activity in human parietal cortex mediates perceptual choice repetition bias	Humans and other animals tend to repeat or alternate their previous choices, even when judging sensory stimuli presented in a random sequence. It is unclear if and how sensory, associative, and motor cortical circuits produce these idiosyncratic behavioral biases. Here, we combined behavioral modeling of a visual perceptual decision with magnetoencephalographic (MEG) analyses of neural dynamics, …		3	x	The study can be considered a follow up from the authors’ previous work, in which they show that biases in the drift rate of evidence accumulation (as opposed to starting point) can explain behavioral findings from a variety of perceptual paradigms (Urai et al., 2019). Here, they surpass some of the limitations associated with behavioral modelling, combining it with brain data, a very powerful wa…	In their work, Urai and Donner present a characterization of the relation between cortical rhythms and choice history biases in the domain of visual perception in humans. More specifically, the authors base their analyses on MEG signals, DDMs, and other statistical analyses to find and track which specific cortical oscillations relate to choice repetition biases relative to the choices made in th…	In this paper, Urai & Donner use human MEG to investigate oscillatory power during perceptual choices, with the goal of disentangling neural signals related to choice and motor history, and how any biases impact on the (computational) decision process. They find oscillatory signals relating to choice and motor action, and differential roles in the evidence accumulation process. While these are ge…	N/A		50	80	50	60	-20	40			20	80	50	80	-40	30			35	80	50	70	-30	35
198	https://www.nature.com/articles/s41467-022-33577-2			2022-05-18	2022-09-22	127	x				U		Sanjoy Dasgupta	M	Saket Navlakha	M	A neural theory for counting memories	Keeping track of the number of times different stimuli have been experienced is a critical computation for behavior. Here, we propose a theoretical two-layer neural circuit that stores counts of stimulus occurrence frequencies. This circuit implements a data structure, called a count sketch, that is commonly used in computer science to maintain item frequencies in streaming data. Our first model …		4	x	The manuscript presents a neural model for how the number of times a specific stimulus has been encountered could be represented in the brain. Two variations of the model are presented: one that relies on Hebbian plasticity and outputs the frequency of occurrence of each stimulus, and one that uses anti-Hebbian plasticity to keep track of occurrence frequency only within the categories 1, 2, 3, a…	This paper proposes two simple neural mechanisms to implement counting of memories. The first counts hashed versions of all memories---classifying them into some number v of categories. The second reduces this to just four categories corresponding to 1-2-3-many. Both give approximately-accurate counts. The designs of the mechanisms are an extension of prior work on novelty detection. The mechanis…	N/A	N/A		80	90	50	80					80	90	50	90					80	90	50	85
200	https://www.nature.com/articles/s41467-022-33747-2			2022-01-07	2022-09-27	263	x				U	27.5	Allen P. F. Chen	M	Qiaojie Xiong	F	Nigrostriatal dopamine pathway regulates auditory discrimination behavior	The auditory striatum, the tail portion of dorsal striatum in basal ganglia, is implicated in perceptual decision-making, transforming auditory stimuli to action outcomes. Despite its known connections to diverse neurological conditions, the dopaminergic modulation of sensory striatal neuronal activity and its behavioral influences remain unknown. We demonstrated that the optogenetic inhibition o…		2	x	Chen et al. investigated the tail portion of the striatum (TS) in an auditory discrimination task using a two-alternative forced choice paradigm. Optogenetic inhibition of either the cell bodies or the terminals of the midbrain dopaminergic projection to the tail of striatum impaired task performance. Next, the Authors found by in vivo Ca imaging that a portion (about 15%) of TS neurons respond t…	In the manuscript entitled “Nigrostriatal dopamine pathway regulates auditory discrimination behaviour” by Chen et al., the authors use a forced choice tone discrimination task in mice to investigate the role of dopamine projections to the tail of the striatum, referred to “auditory striatum” by the authors. They find that optogenetic inhibition of the tail of the striatum during the choice perio…	In the manuscript entitled “Nigrostriatal dopamine pathway regulates auditory discrimination behaviour” by Chen et al., the authors use a forced choice tone discrimination task in mice to investigate the role of dopamine projections to the tail of the striatum, referred to “auditory striatum” by the authors. They find that optogenetic inhibition of the tail of the striatum during the choice perio…	N/A		80	60	60	80	60	80			80	70	50	75	60	70			80	65	55	77.5	60	75
201	https://www.nature.com/articles/s41467-022-33464-w			2021-08-27	2022-09-14	383	x				U	64.7	Andrée-Anne Berthiaume	F	Andy Y. Shih	M	Pericyte remodeling is deficient in the aged brain and contributes to impaired capillary flow and structure	Deterioration of brain capillary flow and architecture is a hallmark of aging and dementia. It remains unclear how loss of brain pericytes in these conditions contributes to capillary dysfunction. Here, we conduct cause-and-effect studies by optically ablating pericytes in adult and aged mice in vivo. Focal pericyte loss induces capillary dilation without blood-brain barrier disruption. These abn…		1	x	Pericytes are cells that grow along and enwrap capillaries, the smallest vessels in the brain, and play important roles in maintenance of vascular integrity and modulation of blood flow. Pericyte loss or dysfunction is implicated in multiple neurological diseases including Alzheimer’s disease. Previously the authors have shown using longitudinal in vivo two-photon imaging that ablation of single …	The aetiology of age-and disease related vascular changes is an intriguing subject as these changes are likely central to the pathogenesis of a number of neurodegenerative disorders. Based on previous work by the same group, this study investigates the consequences of selective cortical pericyte loss in adult and aged mice, whereby the novelty is the comparison to the aged brain. Using a photo-th…	The manuscript presents a study of correlation between deficiency in pericyte remodeling and alterations in microvascular flow in an aging brain. Pericyte recovery is found to slow down with age in a mouse model. Furthermore, pericyte loss appears to result in local vasodilation of capillaries, which affects blood flow distribution. As a result, alterations in blood flow cause remodeling of micro…	N/A		70	80	60	90	70	80			75	80	40	70	50	70			72.5	80	50	80	60	75
202	https://www.nature.com/articles/s41467-022-33642-w			2021-02-02	2022-09-26	601	x				U	100	Junho Kim	M	Eunjung Alice Lee	F	Prevalence and mechanisms of somatic deletions in single human neurons during normal aging and in DNA repair disorders	Replication errors and various genotoxins cause DNA double-strand breaks (DSBs) where error-prone repair creates genomic mutations, most frequently focal deletions, and defective repair may lead to neurodegeneration. Despite its pathophysiological importance, the extent to which faulty DSB repair alters the genome, and the mechanisms by which mutations arise, have not been systematically examined…		1	x	In this study, the authors developed the PhaseDel algorithm, which utilized GATK and DELLY2 to call somatic deletion candidates, then filtered and read-back phased, using clipped reads spanning reliable germline heterozygous SNP sites called from bulk WGS data. They then tried to identify true somatic deletions from 108 single neurons, which increased with age and in highly expressed genes in the…	In this study Kim et al. report a computational method that applies phasing with nearby germline variants to identify somatic deletions in individual neurons, which are otherwise difficult to detect. They identify an age-dependent increase in deletions that appears enriched in expressed genes, which parallels findings regarding single nucleotide mutations. They also profile neurons from individua…	“Prevalence and mechanisms of somatic deletions in single human neurons during normal aging and in DNA repair disorders” The authors report a new bioinformatic tool, PhaseDel, which aims to identify genomic structural variants in single human neurons. The premise follows from this groups previous work, LiRA, wherein proximal heterozygous SNPs are employed to extend the veracity of mosaic variant …	N/A		0	80	70	85	20	50			-30	40	80	80	0	75			-15	60	75	82.5	10	62.5
203	https://www.nature.com/articles/s41467-022-33507-2			2021-11-18	2022-09-21	307			x		E	95	Soraya L. S. Dunn	F	Daniel Bendor	M	Behaviourally modulated hippocampal theta oscillations in the ferret persist during both locomotion and immobility	Theta oscillations are a hallmark of hippocampal activity across mammals and play a critical role in many hippocampal models of memory and spatial navigation. To reconcile the cross-species differences observed in the presence and properties of theta, we recorded hippocampal local field potentials in rats and ferrets during auditory and visual localisation tasks designed to vary locomotion and se…		2	x	In this study, authors analyzed hippocampal LFP activity from rats and ferrets during auditory and visual localization tasks. They reported that locomotion-related theta oscillations in ferrets are slower in frequency than in rats. They also showed that theta in ferrets persists during immobility, unlike in rats. This immobility-related theta in ferrets, unlike locomotion-related theta, was sensi…	This study compares hippocampal theta oscillations in rats and ferrets during auditory and visual localisation tasks. The authors report theta oscillations in both species during locomotion, while theta during immobility was observed only in ferrets, with the seemingly stronger amplitude during the reward epochs. Due to its sensitivity to atropine, the authors conclude that immobility-related the…	In this paper, Dunn and colleagues compare the occurrence of hippocampal theta rhythms between ferrets and rats. This is an important, well written study that will contribute important insights by demonstrating how the theta rhythm can vary between species, which will need to be reconciled with the current theories of memory formation. The paper will likely be of broad interest for the neuroscien…	N/A		80	70	30	80	80	80			80	80	0	90	80	70			80	75	15	85	80	75
205	https://www.nature.com/articles/s41467-022-33500-9			2021-10-08	2022-09-21	348	x				U	100	Sebastian Boland	M	Robert V. Farese Jr	M	Deficiency of the frontotemporal dementia gene GRN results in gangliosidosis	Haploinsufficiency of GRN causes frontotemporal dementia (FTD). The GRN locus produces progranulin (PGRN), which is cleaved to lysosomal granulin polypeptides. The function of lysosomal granulins and why their absence causes neurodegeneration are unclear. Here we discover that PGRN-deficient human cells and murine brains, as well as human frontal lobes from GRN-mutation FTD patients have increase…		5	x	This is a review of a very interesting manuscript entitled “Deficiency of the frontotemporal dementia gene GRN results in gangliosidosis” by Boland et al. Here, the authors address a longstanding and central question in the neurodegeneration field: Why does loss of the intralysosomal protein progranulin (PGRN) result in lysosomal dysfunction, likely the root cause of neurodegeneration in patients…	This manuscript by Boland et al reports a link between progranulin (PGRN), a lysosomal protein whose gene is mutated in frontotemporal dementia (FTD), and ganglioside metabolism. The authors use LC/MS techniques to demonstrate loss of PGRN in vitro (HeLa cells), in vivo (GRN knock-in mice) or in the brain of FTD patients perturbs ganglioside metabolism, resulting in accumulation of different spec…	The manuscript “Deficiency of the frontotemporal dementia gene GRN results in gangliosidosis” by Boland et al. describes an intriguing observation, i.e. lysosomal accumulation of gangliosides in brain of PGRN-deficient mice. This abnormality seems likely to be ascribed to the noted reduction of the lysosomal lipid BMP known to assist ganglioside degradation in lysosomes. This finding is highly no…	The manuscript studied lysosomal lipid degradation influenced by progranulin deficiency in frontotemporal dementia. Gangliosides and other lipids were quantified in mouse and human brains with PGRN deficiency. The authors then thoroughly investigated various lysosomal functions and enzymes involved in GSL degradation in HeLa cells with GRN KO, Ctrl, and GRN KO-add back. The manuscript was well wr…		90	80	50	80	80	90	70	70	90	95	70	50	70	90	60	80	90	87.5	60	65	75	90	65
207	https://www.nature.com/articles/s41467-022-33467-7			2021-12-10	2022-09-16	280			x		E	31.9	Alexandra Segref	F	Thorsten Hoppe	M	Thermosensation in Caenorhabditis elegans is linked to ubiquitin-dependent protein turnover via insulin and calcineurin signalling	Organismal physiology and survival are influenced by environmental conditions and linked to protein quality control. Proteome integrity is achieved by maintaining an intricate balance between protein folding and degradation. In Caenorhabditis elegans, acute heat stress determines cell non-autonomous regulation of chaperone levels. However, how the perception of environmental changes, including ph…		1	x	This is a beautiful and very important paper. It was a pleasure to read (and to review). Very briefly, what Segref et al. show is that ciliated neurons (and they also dig into the role of a few specific neurons, AWA and AFD) control ubiquitin dependent protein turnover non-cell autonomously. They find also numerous mechanistic details regarding this systemic effect, notably the involvement of FLP…	What are the noteworthy results? This article helps define a cellular and genetic pathway that control protein turnover in the intestine of C.elegans. Importantly, the pathway is initiated by the loss of function in ciliated sensory neurons, which leads to transmission, likely via a peptide signal, to the intestine, where daf-16-regulated protein turnover is inhibited. Particularly important resu…	This study by Segref et al demonstrates that the lack of sensory perception, via AFD neuronal signalling activity, regulates ubiquitin-dependent protein turnover in the intestine. The authors identify INS-5 (insulin-like signalling) and TAX-6 (calcineurin signalling) as mediators of this neuronto- gut communication, with negative regulation of the FOXO transcription factor DAF-16 regulating UPS a…	Protein degradation through the 26S proteasome is part of the cellular protein quality control and also essential for the cellular response to stress. In this manuscript, Alexandra Segref and colleagues investigated how sensation of environmental changes such as changes in temperature impact on protein degradation. To this end, they used as model system mutant worms lacking distal segments of sen…		90	95	60	80	70	80	70	70	80	80	80	80	80	80	70	80	85	87.5	70	80	75	80	70
208	https://www.nature.com/articles/s41467-022-33208-w			2021-11-03	2022-09-08	309	x				U	53.7	Susan Hastings	F	Reggie Edgerton	M	A pilot study combining noninvasive spinal neuromodulation and activity-based neurorehabilitation therapy in children with cerebral palsy	Cerebral Palsy (CP) is the most common pediatric motor disability with multiple symptoms and etiologies. CP is exhibited through sensorimotor delays, impaired posture resulting in limited activities and participation. Our recently concluded, single arm, unblinded, pilot study (NCT04882592) explored whether an intervention combining non-invasive spinal neuromodulation during an activity-based neur…		5	x	This manuscript explores an intervention that combines activity-based neurorehabilitation therapy (ABNT) with transcutaneous spinal stimulation on gross motor function in children with CP. Children with CP were recruited to undertake an 8-week intervention of spinal stimulation combined with ABNT. Before and after the intervention, outcome measures (gross motor function scale and a pediatric qual…	Summary of Key Findings: Researchers found that 16 sessions across 8 weeks of transcutaneous electrical spinal cord stimulation in concert with ‘activity-based neurorehabilitation therapy’ significantly improved motor abilities in children with mild cerebral palsy (GMFCS I-II) and severe cerebral palsy (GMFCS IV-V) assessed with the GMFM-88. The findings are a significant contribution to the fiel…	This is a research report of 14 children with cerebral palsy who have undergone a combination of activity-based neurorehabilitation with transcutaneous electrical spinal cord stimulation over the course of 8 weeks. The subjects were categorized using the gross motor function classification scale as ranging from level I to V. Participants were tested using the gross motor function measure-88 as th…	N/A		10	80	50	50	30	70			10	80	50	80	30	80			10	80	50	65	30	75
209	https://www.nature.com/articles/s41467-022-33579-0			2022-02-09	2022-09-22	225		x			A	34.1	Yuri Imaizumi		Hiroshi Yamada	M	A neuronal prospect theory model in the brain reward circuitry	Prospect theory, arguably the most prominent theory of choice, is an obvious candidate for neural valuation models. How the activity of individual neurons, a possible computational unit, obeys prospect theory remains unknown. Here, we show, with theoretical accuracy equivalent to that of human neuroimaging studies, that single-neuron activity in four core reward-related cortical and subcortical r…		3	x	This is a potentially interesting article in the field of neuroeconomics that addresses an important issue – whether the responses of individual neurons in monkeys passively viewing a lottery obey a prominent theory of choice, prospect theory, that has been previously validated exclusively in human neuroimaging studies. However, given the poor spatial and temporal resolution of functional imaging…	This is an interesting, novel, systematic and theory-driven study on the neuronal processing of the two most fundamental economic decision variables, using the well-established framework of economic choice theory. The authors have studied the two main variables, subjective utility and subjectively weighted probability, to investigate neuronal responses in four main reward areas of the brain. The …	N/A	N/A		50	60	60	70					50	70	50	80					50	65	55	75
210	https://www.nature.com/articles/s41467-022-33581-6			2021-07-01	2022-09-22	448	x				U	100	Rishi Rajalingham	M	Mehrdad Jazayeri	M	Recurrent neural networks with explicit representation of dynamic latent variables can mimic behavioral patterns in a physical inference task	Primates can richly parse sensory inputs to infer latent information. This ability is hypothesized to rely on establishing mental models of the external world and running mental simulations of those models. However, evidence supporting this hypothesis is limited to behavioral models that do not emulate neural computations. Here, we test this hypothesis by directly comparing the behavior of primat…		3	x	In this paper, the authors used an intuitive physics task (move paddle to catch ball) to compare the performance of humans, non-human primates, and a zoo of RNN models. The RNNs varied by input, architecture, regularization, and optimization. The main yardstick of comparison was "human consistency". The authors conclude that while many of the RNNs achieve reasonable task performance, human consis…	Rajalingham, Piccato, and Jazayeri introduce a new behavioral paradigm to test whether primates perform dynamic inference to track objects in the world. They show that humans and monkeys are capable of similar performance on this simple task, and then use recurrent neural network models to validate that the primates are likely using dynamic inference to complete the task. I appreciate a lot what …	In this study, Rishi Rajalingham, Aida Piccato, and Mehrdad Jazayeri test whether primates use mental simulation for tracking dynamical latent states. First, let me summarize my understanding of some basic concepts to make sure we are on the same page. When sensory measurements are not available, we must rely solely on our internal model to infer latent states. When the internal model is dynamic …	N/A		80	70	80	60	80	60			70	80	70	90	90	80			75	75	75	75	85	70
211	https://www.nature.com/articles/s41467-022-33061-x			2021-01-15	2022-08-31	593	x				U		Faith Conroy	F	Edith L. Pfister	F	Chemical engineering of therapeutic siRNAs for allele-specific gene silencing in Huntington’s disease models	Small interfering RNAs are a new class of drugs, exhibiting sequence-driven, potent, and sustained silencing of gene expression in vivo. We recently demonstrated that siRNA chemical architectures can be optimized to provide efficient delivery to the CNS, enabling development of CNS-targeted therapeutics. Many genetically-defined neurodegenerative disorders are dominant, favoring selective silenci…		5	x	The manuscript by Conroy and colleagues describes the optimization of an siRNA that selectively inhibits the mutant huntingtin (HTT) mRNA and preserves the expression of unaffected allele. Allele selective targeting of the mutant HTT RNA by various RNA targeting strategies has been well described in the literature, including by the authors of this manuscript. The authors described further optimiz…	The manuscript “Chemical engineering of siRNAs for allele-specific gene silencing in vivo in CNS” by Conroy et al. makes use of mismatch mediated selectivity of siRNAs for Huntington disease model. The concepts and rationale have been well-thought out and has been done in a logical manner. Before this article is accepted for publication, the following questions need to be addressed: 1. The author…	This manuscript by Khvorova and colleagues explores possible variations of htttargeting siRNA design that can render these SNP-based, allele-targeted siRNAs more allele-specific. This is not only an important elucidation of modifications allowing selective targeting mutant versus wild-type htt alleles, but also an excellent contribution to the design of SNP-targeted siRNAs in general. The former …	N/A		10	80	0	80	80	80			0	70	0	80	80	95			5	75	0	80	80	87.5
212	https://www.nature.com/articles/s41467-022-33578-1			2021-06-17	2022-09-22	462	x				U	87.2	Parker Singleton		Amy Kuceyeski	F	Receptor-informed network control theory links LSD and psilocybin to a flattening of the brain’s control energy landscape	Psychedelics including lysergic acid diethylamide (LSD) and psilocybin temporarily alter subjective experience through their neurochemical effects. Serotonin 2a (5-HT2a) receptor agonism by these compounds is associated with more diverse (entropic) brain activity. We postulate that this increase in entropy may arise in part from a flattening of the brain’s control energy landscape, which can be o…		3	x	LSD flattens the brain’s energy landscape: evidence from receptor-informed network control theory In this article the authors use network control theory to explore the effects of psychedelics on explorations of state space of brain activity. The principal finding is that the space is “flattened”, i.e. there exists a reduction in the energy needed to move from one state to another. This topic is t…	In another reanalysis alongside the 15+ other reanalyses of this dataset (more publications than participants), Singleton and colleagues provide partial evidence for the REBUS model. Although this may be one of the better tests of REBUS, the salami slicing has gotten out of control. Not only is the small sample (N = 15) not independent of all the other tests of REBUS, the analyses themselves are …	N/A	N/A		10	60	-80	-45					0	90	-80	-20					5	75	-80	-32.5
213	https://www.nature.com/articles/s41467-022-33517-0			2021-08-08	2022-09-20	408	x				U	81.5	Sam Audrain	M	Mary Pat McAndrews	M	Schemas provide a scaffold for neocortical integration of new memories over time	Memory transformation is increasingly acknowledged in theoretical accounts of systems consolidation, yet how memory quality and neural representation change over time and how schemas influence this process remains unclear. We examined the behavioral quality and neural representation of schema-congruent and incongruent object-scene pairs retrieved across 10-minutes and 72-hours using fMRI. When a …		3	x	In this manuscript, Audrain and colleagues examine how semantic congruency and contextual overlap influence associative memory across time, while also exploring how such memories are represented in the hippocampus and mPFC. Participants were scanned while they encoded object-context pairs that were either congruent or incongruent with semantic knowledge. They then retrieved these associations eit…	The manuscript addresses an important and timely question, namely how prior knowledge influences memory transformation over time. This is an interesting paper, linking together exciting psychological and neuroscientific questions and using an elegant and suitable task and fMRI methods to answer these questions. Further, conducting such a complicated multi-session fMRI study it is a herculean effo…	N/A	N/A		10	70	65	85					50	80	80	70					30	75	72.5	77.5
214	https://www.nature.com/articles/s41467-022-33463-x			2021-06-01	2022-09-16	472	x				U		Floriane Bretheau	F	Steve Lacroix	M	The alarmin interleukin-1α triggers secondary degeneration through reactive astrocytes and endothelium after spinal cord injury	Spinal cord injury (SCI) triggers neuroinflammation, and subsequently secondary degeneration and oligodendrocyte (OL) death. We report that the alarmin interleukin (IL)−1α is produced by damaged microglia after SCI. Intra-cisterna magna injection of IL-1α in mice rapidly induces neutrophil infiltration and OL death throughout the spinal cord, mimicking the injury cascade seen in SCI sites. These …		5	x	The alarmin interleukin-1α triggers secondary degeneration through reactive astrocytes and endothelium after spinal cord injury General Impressions: There is a lot to unpack in this paper, and though it is generally well written the conceptual framework is at times hard to follow and tenuous. I would not say any of the findings reported here are surprising or novel, but this does add incrementall…	The manuscript by Bretheau and colleagues provides a mechanistic investigation of the role of IL-1a – IL-1R1 signalling in oligodendrocyte death in two models of CNS inflammation, traumatic spinal cord injury and injection of IL-1a into the cisterna magna. The present study advances significantly from previously published work, addressing outstanding various knowledge gaps at both the cellular an…	The manuscript by Bretheau et al focuses on interleukin-1α (IL1a) as a key factor in neuroinflammation and oligodendrocyte (OL) loss after spinal cord injury (SCI). After determining that microglial cells are the main source of IL1a during the subacute phase after SCI, they demonstrate that intra cisternal magna delivery of IL1a induces glial activation, neutrophil infiltration and mature OL deat…	N/A		25	70	80	50	80	80			-20	40	75	50	80	70			2.5	55	77.5	50	80	75
216	https://www.nature.com/articles/s41467-022-33508-1			2022-02-23	2022-09-16	205			x		E	25.6	Guido Marco Cicchini	M	David Charles Burr	F	Crowding results from optimal integration of visual targets with contextual information	Crowding is the inability to recognize an object in clutter, usually considered a fundamental low-level bottleneck to object recognition. Here we advance and test an alternative idea, that crowding, like predictive phenomena such as serial dependence, results from optimizing strategies that exploit redundancies in natural scenes. This notion leads to several testable predictions: crowding should …		4	x	This is an outstanding manuscript. The authors propose a novel and fascinating connection between crowding and serial dependence, two extensively studied areas of perception and cognition. They thoroughly test their idea psychophysically and with modeling. The results support the hypothesis and this will stimulate a lot of future research. I know this hypothesis will be provocative in the field, …	This is a fascinating manuscript, with novel findings that present a new perspective on a widely studied phenomenon. The authors examine visual crowding, the disruptive effect of clutter on object recognition. A large body of research has depicted this effect as the ‘fundamental bottleneck on object recognition’ in peripheral vision especially. As a result, we know a great deal about the way this…	Cicchini and colleagues put forward the hypothesis that crowding is results from Bayes-optimal integration of visual targets with spatial context. The authors identify four features of their empirical data that are consistent with Bayes-optimal integration: (1) Crowding is strongest for reliable flankers and unreliable targets, (2) Crowding depends on flanker-target similarity (here orientation),…	N/A		90	80	80	90	0	80			100	100	70	80	5	60			95	90	75	85	2.5	70
217	https://www.nature.com/articles/s41467-022-33542-z			2022-04-05	2022-09-21	169			x		E	64.6	Juan F. Quintana	M	Annette MacLeod	M	Single cell and spatial transcriptomic analyses reveal microglia-plasma cell crosstalk in the brain during Trypanosoma brucei infection	Human African trypanosomiasis, or sleeping sickness, is caused by the protozoan parasite Trypanosoma brucei and induces profound reactivity of glial cells and neuroinflammation when the parasites colonise the central nervous system. However, the transcriptional and functional responses of the brain to chronic T. brucei infection remain poorly understood. By integrating single cell and spatial tra…		5	x	The manuscript from Quintana et al utilizes single cell transcriptomics, including spatial transcriptomics) to examine the CNS response to T. brucei infection. The authors identify that circumventricular organs appear to have the most parasite and corresponding inflammation. The transcriptomic analyses indicate several flavors of microglia/monocytes in the CNS including those with high expression…	The authors have studied the transcriptional reponse in the brain-hypothalamus to T. brucei using single cell RNA-seq and spatial transcriptomics. The methods are really well described and with the data analysis scripts being made available upon publication the work should be reproducible. - The authors have used 10x v3.1 to generate single cell RNA-seq data. Though they are targetting the immune…	Previous work has demonstrated that T. brucei infection results in glial cell activation and neuroinflammation. However, the molecular mechanisms that govern these processes are unknown. This work utilizes two powerful approaches, scRNAseq and spatial transcriptomics, to define the transcriptional responses of different classes of immune cells within a well-defined area of the brain at two differ…	N/A		50	80	40	70	70	85			50	70	20	70	50	70			50	75	30	70	60	77.5
218	https://www.nature.com/articles/s41467-022-33484-6			2022-05-10	2022-09-21	134			x		E	43	Anastasiya Strembitska	F	Bernard Thorens	M	Lipid biosynthesis enzyme Agpat5 in AgRP-neurons is required for insulin-induced hypoglycemia sensing and glucagon secretion	The counterregulatory response to hypoglycemia that restores normal blood glucose levels is an essential physiological function. It is initiated, in large part, by incompletely characterized brain hypoglycemia sensing neurons that trigger the secretion of counterregulatory hormones, in particular glucagon, to stimulate hepatic glucose production. In a genetic screen of recombinant inbred BXD mice…		1	x	This manuscript describes the results from experiments designed to determine the role that Agpat5 plays in hypoglycemia-induced glucagon secretion. This follows the identification of this gene as a candidate regulator previously by this group. Using a variety of transgenic mouse models they demonstrate that Agpat5 expressed in hypothalamic (arcuate) AgRP neurons (not VMH or LH) is required for Ag…	The authors previously performed a genetic screen to identify novel hypothalamic regulators of insulin-induced glucagon secretion. They found QTLs on chromosome 8 and 15. Irak4 was identified in the QTL of chromosome 15. They now wished to investigate a candidate gene of the chromosome 8 QTL, namely Agpat5 ((1-acylglycerol-3-phosphate-O-acyltransferase 5) in glucagon secretion. Inactivation of Ag…	This paper describes a role of Agpat5 in AgRP neurons in sensing insulin-induced hypoglycemia and related elevated glucagon secretion. In my view, the overall message is novel and important. I find many of the studies well designed, executed and interpreted. However, there are several results that are incomplete or do not address the critical questions. 1) The paper is about the counter regulator…	N/A		50	90	30	50	50	70			50	70	50	75	50	70			50	80	40	62.5	50	70
222	https://www.nature.com/articles/s41467-022-32761-8			2021-04-27	2022-08-16	476	x				U		John A. Gaynes	M	Alon Poleg-Polsky	M	Classical center-surround receptive fields facilitate novel object detection in retinal bipolar cells	Antagonistic interactions between center and surround receptive field (RF) components lie at the heart of the computations performed in the visual system. Circularly symmetric center-surround RFs are thought to enhance responses to spatial contrasts (i.e., edges), but how visual edges affect motion processing is unclear. Here, we addressed this question in retinal bipolar cells, the first visual …		3	x	The article by Gaynes et al. entitled “Novel object detection and multiplexed motion representation in retinal bipolar cells” provided the novel finding of the motionemergence sensitivity in retinal bipolar cells. The authors performed two-photon glutamate imaging from the inner layers of the mice retina. The analysis of response kinetics to the static flash, continuous motion, and motion emergen…	The manuscript by Gaynes and colleagues explores the responses of bipolar cells (BCs) in the mouse retina to the appearance of static objects and various kinds of motion. The authors measure glutamate release throughout the inner plexiform layer (IPL) with a ubiquitously expressed virus (Figs. 1-3) and specifically onto the neurites of starburst amacrine cells (SACs) with a SAC-specific mouse lin…	This study focuses on the visual encoding properties of retinal bipolar cells. Response properties of these cells are an re-emerging field of study and this work is timely. The authors use two-photon fluorescence glutamate imaging to measure stimulus-evoked responses of functionally identified bipolar cell types and report that responses to visual stimuli that first appear in the receptive field …	N/A		60	75	-40	50	30	75			80	50	20	50	20	80			70	62.5	-10	50	25	77.5
223	https://www.nature.com/articles/s41467-022-32762-7			2021-05-31	2022-08-16	442			x		E	81.8	Sarah Strauss	F	Anna L. Vlasits	F	Center-surround interactions underlie bipolar cell motion sensitivity in the mouse retina	Motion sensing is a critical aspect of vision. We studied the representation of motion in mouse retinal bipolar cells and found that some bipolar cells are radially direction selective, preferring the origin of small object motion trajectories. Using a glutamate sensor, we directly observed bipolar cells synaptic output and found that there are radial direction selective and non-selective bipolar…		2	x	The manuscript by Strauss and colleagues explores the spatiotemporal receptive field properties of bipolar cells (BCs) in the mouse retina, focusing on how they affect the encoding of moving stimuli. The authors measure the glutamate output of BCs throughout the retina using iGluSnFR expressed either non-specifically or in starburst amacrine cells (SACs) in Figs. 6-8. Overall, this is a well-pres…	This study reports on the local motion-evoked response of bipolar cells in the mouse retina. Using two-photon fluorescence glutamate imaging, the authors show that the majority of anatomically/functionally identified bipolar cell types respond more strongly to object motion originating within their receptive field compared with object motion entering their receptive field. The methods used to dem…	This manuscript examines the role of bipolar cells in the processing of visual motion in the mouse retina. Bipolar cells play a key role in transmitting the light signal from the photoreceptors to the downstream ganglion cells and amacrine cells. Strauss et al. report that the glutamatergic outputs of some bipolar cells in the mouse retina exhibit motion origin-dependent radial direction discrimi…	N/A		80	80	30	70	-30	20			90	90	50	80	-25	50			85	85	40	75	-27.5	35
226	https://www.nature.com/articles/s41467-022-33200-4			2022-02-25	2022-09-07	194	x				U	98.5	Mable Lam	F	Bradley Zuchero	M	CNS myelination requires VAMP2/3-mediated membrane expansion in oligodendrocytes	Myelin is required for rapid nerve signaling and is emerging as a key driver of CNS plasticity and disease. How myelin is built and remodeled remains a fundamental question of neurobiology. Central to myelination is the ability of oligodendrocytes to add vast amounts of new cell membrane, expanding their surface areas by many thousand-fold. However, how oligodendrocytes add new membrane to build …		1	x	This review was completed with a graduate student as a training exercise. We read the manuscript and prepared our summaries independently, and then discussed them to arrive at the following consensus report. Myelination is essential to brain health and function, but yet the cellular and molecular mechanisms that facilitate the wrapping and growth of myelin membrane on axons remain incompletely de…	This interesting study investigated the role of SNARE proteins VAMP2 and 3 in control of myelin formation by oligodendrocytes and Schwann cells. The expansion of membrane area and proper insertion of integral membrane proteins to form nodal domains are crucial events involved in myelination, but the molecular mechanisms that orchestrate the spatial and temporal dynamics of these events remain to …	This manuscript by Lam et al., in the Zuchero lab demonstrates a critical role for VAMP2/3- mediated exocytosis in membrane expansion of oligodendrocytes and consequentially the myelination of axons. Using an elegant combination of in vitro culture systems and clever genetic models to block VAMp2/3 exocytosis, the study demonstrates that VAMP2 and VAMP3 mediated exocytosis occurs primarily in the…	N/A		90	80	80	60	90	80			90	90	50	70	90	80			90	85	65	65	90	80
227	https://www.nature.com/articles/s41467-022-33240-w			2021-10-06	2022-09-08	337	x				U		Elena N. Waidmann	F	David A. Leopold	M	Local features drive identity responses in macaque anterior face patches	Humans and other primates recognize one another in part based on unique structural details of the face, including both local features and their spatial configuration within the head and body. Visual analysis of the face is supported by specialized regions of the primate cerebral cortex, which in macaques are commonly known as face patches. Here we ask whether the responses of neurons in anterior …		3	x	1. Summary The authors address the question whether neurons in the anterior face patches (AM and AF) in macaque IT, previously thought to represent facial identity, are mainly driven by local facial features or holistic facial structure. Using a recent chronic, multi-unit recording technique (Microprobe), they collected response data to a large number of combinations of facial and body parts to r…	In this manuscript, Waidmann et al tested whether the anterior face patches of the macaque temporal lobe, thought to be important for identity discrimination, primarily encode global or local facial features. They extracted the eyes, mouth, facial contour and body from natural images of 10 different individuals and systematically switched them, creating a large set of "recombinant" visual stimuli…	N/A	N/A		90	90	70	60					80	90	80	60					85	90	75	60
229	https://www.nature.com/articles/s41467-022-33242-8			2021-10-29	2022-09-08	314			x		E	70.1	Matías A. Goldin	M	Olivier Marre	M	Context-dependent selectivity to natural images in the retina	Retina ganglion cells extract specific features from natural scenes and send this information to the brain. In particular, they respond to local light increase (ON responses), and/or decrease (OFF). However, it is unclear if this ON-OFF selectivity, characterized with synthetic stimuli, is maintained under natural scene stimulation. Here we recorded ganglion cell responses to natural images sligh…		2	x	The manuscript by Goldin, Lefebvre, and Colleagues investigates the response properties of retinal ganglion cells (RGCs) to natural scene stimuli. They find a population of RGCs in mouse and salamander retinas that respond to local contrast. These RGCs do not have a feature selectivity that is fixed in polarity – responding to either increments (ON) or decrements (OFF) of light intensity. The aut…	Goldin, Lefebvre and colleagues recorded from the retinas of mice and axolotl and found that the image-evoked responses approximated a computation of local contrast by each cell. Previous studies have found that CNN models outperform conventional LN models at predicting retinal responses, but none have provided a simplified explanation of the nonlinearities produced by the CNN. This conclusion is…	N/A	N/A		80	90	50	70					90	80	30	80					85	85	40	75
230	https://www.nature.com/articles/s41467-022-32947-0			2021-11-04	2022-08-24	293	x				U	81.8	Yixin Wu		John A. Rogers	M	Wireless multi-lateral optofluidic microsystems for real-time programmable optogenetics and photopharmacology	In vivo optogenetics and photopharmacology are two techniques for controlling neuronal activity that have immense potential in neuroscience research. Their applications in tether-free groups of animals have been limited in part due to tools availability. Here, we present a wireless, battery-free, programable multilateral optofluidic platform with user-selected modalities for optogenetics, pharmac…		2	x	The paper of Wu et al. describes a novel wireless, implantable system for multi-wavelength optogenetics, fluid and gene delivery, and photopharmacology. Additional advantages and desirable features include: interconnect flexibility, real-time programmability of multiple devices through a graphical interface, moderate cost, versatility of the unilateral Vs. bilateral configurations, flow control v…	General comment: The authors presented a systematic work of device fabrication, characterization and implementation of the wirelessly operated optofluidic system with colocalized drug delivery and optical stimulation. Apart from the off-the-shelf electronic components, the author developed and optimized key items of the coiled receiving antenna, electrolysis μ-pump and μ-reservoir, microfluidic c…	The manuscript describes a wireless optofluidic system that allows to infuse liquid and deliver light to target brain regions. The authors showed the capability of the multilateral optofluidic system through in-vivo experiments with freely moving mice. Also, they showed the system could be utilized for photopharmacology. The in-vivo experiments were well performed and showed the functions of the …	N/A		80	80	50	80	10	80			80	80	60	90	0	100			80	80	55	85	5	90
231	https://www.nature.com/articles/s41467-022-33241-9			2021-10-27	2022-09-08	316		x			A	77.4	Qi Wang		Tian-Le Xu	M	Insular cortical circuits as an executive gateway to decipher threat or extinction memory via distinct subcortical pathways	Threat and extinction memories are crucial for organisms’ survival in changing environments. These memories are believed to be encoded by separate ensembles of neurons in the brain, but their whereabouts remain elusive. Using an auditory fear-conditioning and extinction paradigm in male mice, here we discovered that two distinct projection neuron subpopulations in physical proximity within the in…		2	x	In this manuscript, Wang and colleagues investigate the roles of two distinct projection-defined insular cortex neuron subpopulations in fear conditioning and extinction. Major findings of this study include: i) Fear memory- and extinction memory-encoding neurons are found to be enriched in the anteriror insular cortex (aIC) using the FosTRAP method. Furthermore, optogenetic inhibition of fear- a…	In this study, the authors characterized how the insular cortex (IC) mediates fear expression and extinction through projections to the central amygdala (CeA) and the nucleus accumbens (NAc), respectively. Using state-of-the-art engram tagging, optogenetics, chemogenetics, viral intersectional approaches, photometry, slice electrophysiology and tracing, the authors found how IC-CeA and IC-NAc cir…	In the present study, the authors made an excellent and complete job on studying the role of neuronal projections coming from the Insular cortex (IC) to either the Central Amygdala (CeA) or to the Nucleus Accumbens (NAc) during fear conditioning and extinction phases (learning and memory). The authors show that while IC-CeA projection is critical for fear conditioning (and its retrieval/expressio…	N/A		80	80	85	90	80	70			70	70	90	80	90	80			75	75	87.5	85	85	75
234	https://www.nature.com/articles/s41467-022-33140-z			2021-07-20	2022-09-02	409	x				U		Jing-Ping Lin		Daniel S. Reich	M	Transcriptomic architecture of nuclei in the marmoset CNS	To understand the cellular composition and region-specific specialization of white matter — a disease-relevant, glia-rich tissue highly expanded in primates relative to rodents — we profiled transcriptomes of ~500,000 nuclei from 19 tissue types of the central nervous system of healthy common marmoset and mapped 87 subclusters spatially onto a 3D MRI atlas. We performed cross-species comparison, …		1	x	This manuscript from Reich lab offers an extensive inspection of cellular composition and locationspecific specialization of white matter compared with gray matter profiling many nuclei in total from 19 tissue types from marmoset central nervous system. The authors were able to successfully map the effect of gray vs. white matter on primary glial cell types and functional heterogeneity. It will b…	The authors are to be commended in their approach and thoroughness in the computational methodologies used to analyze and validate their data. However, the depth to which these methods were applied did not correlate to an increase in the scientific/biological significance of the finding. This study can be groundbreaking in understanding regional heterogeneity of neuronal and glial cells in multip…	This interesting study by Lin et al. focuses on understanding how microenvironmental influences in different regions of the CNS impact developmental and functional heterogeneity of glia. The authors utilize the marmoset to investigate this question in white matter and gray matter regions of the marmoset brain. The marmoset CNS displays unique properties when compared to mouse, in particular the m…	N/A		80	70	-50	30	70	80			80	90	-50	20	80	90			80	80	-50	25	75	85
235	https://www.nature.com/articles/s41467-022-33141-y			2021-12-23	2022-09-02	253	x				U	86.7	Rebecca J. Rabinovich	F	Randy M. Bruno	M	Learning enhances encoding of time and temporal surprise in mouse primary sensory cortex	Primary sensory cortex has long been believed to play a straightforward role in the initial processing of sensory information. Yet, the superficial layers of cortex overall are sparsely active, even during sensory stimulation; additionally, cortical activity is influenced by other modalities, task context, reward, and behavioral state. Our study demonstrates that reinforcement learning dramatical…		2	x	This is an intriguing study that will be of interest to people working in sensory (particularly tactile) perception, in the neural correlates of goal-directed decision making and in the neural underpinnings of time perception. Its substantial contribution builds on earlier work on population coding of sensory and non-sensory variables in somatosensory cortex, providing suggestive results on how t…	This manuscript examines learning-dependent changes in barrel cortex. Calcium imaging of the barrel cortex was performed before and after animals were trained on a task in which they received a water reward shortly after the offset of whisker stimulation. The results show a fairly dramatic increase in the number of neurons that respond to whisker stimulation after conditioning (“expert”), and sho…	The authors investigate the responses of layer 2/3 cells in primary somatosensory cortex over the course of learning a Pavlovian detection task. They found that, contrary to prevailing assumptions, this region is not limited to encoding sensory information, but also shows activity related to surprise, reward, and the temporal structure of a task. They also showed that, while more neurons became a…	N/A		80	70	40	70	60	80			70	60	20	80	50	75			75	65	30	75	55	77.5
236	https://www.nature.com/articles/s41467-022-33084-4			2021-12-03	2022-08-26	266			x		E	54.1	Arita Silapetere	F	Peter Hegemann	M	QuasAr Odyssey: the origin of fluorescence and its voltage sensitivity in microbial rhodopsins	Rhodopsins had long been considered non-fluorescent until a peculiar voltage-sensitive fluorescence was reported for archaerhodopsin-3 (Arch3) derivatives. These proteins named QuasArs have been used for imaging membrane voltage changes in cell cultures and small animals. However due to the low fluorescence intensity, these constructs require use of much higher light intensity than other optogene…		1	x	This manuscript reports a study on opsin-based fluorescent voltage indicators. The study was carefully carried out with the combination of a variety of experiments and molecular dynamics simulations. The authors present comprehensive data on the voltage-dependent fluorescence properties and structural changes and showed that voltage-dependent changes of the hydrogen-bonding networks modulate the …	The paper addresses the origin of fluorescence and its voltage sensitivity in microbial rhodopsins. A combination of time-resolved and stationary spectroscopic studies together with MD homology modeling of the voltage-dependent structure changes and functional patch clamping of cells is interpreted by voltage-induced structural changes of key residues that affect hydrogen-bonded networks, the flu…	The authors Silapetere et al. executed a series of spectroscopy analysis of recently developed Archaerhodopsin voltage sensors. This line of research seeks to better understand the role of individual mutations on key properties of the sensors, such as quantum yield and sensitivity. The experiments are thorough, and follow in a long line of spectroscopy developed in the Hegemann lab. The authors g…	N/A		80	70	80	80	20	80			80	90	80	100	10	50			80	80	80	90	15	65
237	https://www.nature.com/articles/s41467-022-33252-6			2022-01-03	2022-09-08	248			x		E	98.8	Derya Emin	F	David Klenerman	M	Small soluble α-synuclein aggregates are the toxic species in Parkinson’s disease	Soluble α-synuclein aggregates varying in size, structure, and morphology have been closely linked to neuronal death in Parkinson’s disease. However, the heterogeneity of different co-existing aggregate species makes it hard to isolate and study their individual toxic properties. Here, we show a reliable non-perturbative method to separate a heterogeneous mixture of protein aggregates by size. We…		5	x	Drs. Emin and Klenerman's group showed that aggregates of wild-type α-synuclein (αsyn) smaller than 200 nm in length, cause inflammation and permeabilization of liposome membranes. Studying soluble aggregates extracted from post-mortem human brains also reveals that these aggregates are similar in size and structure to the smaller aggregates. Furthermore, the soluble aggregates present in PD brai…	In this paper, Emin et al. study the toxicity of α-synuclein correlated with aggregate size, structure, and morphology. The authors separate the α-synuclein aggregates using sucrose density centrifugation. Various complementary techniques are used to measure the size and structure of the aggregates,including transmission electron microscopy (TEM), total internal reflection fluorescence (TIRF) mic…	In this article, Derya Emin and colleagues propose that small soluble aggregates of α-synuclein constitute the toxic forms in PD. They apply a non-perturbing method of discontinuous sucrose gradient to separate different species of α-synuclein formed in an in vitro aggregation reaction and characterize the structural properties using TIRFM, single-molecule super-resolution microscopy, AFM, and Si…	N/A		20	80	80	60	70	60			30	80	70	70	50	80			25	80	75	65	60	70
240	https://www.nature.com/articles/s41467-022-33245-5			2022-01-17	2022-09-08	234	x				U		Wenhao Li		Yong Gu	M	Causal contribution of optic flow signal in Macaque extrastriate visual cortex for roll perception	Optic flow is a powerful cue for inferring self-motion status which is critical for postural control, spatial orientation, locomotion and navigation. In primates, neurons in extrastriate visual cortex (MSTd) are predominantly modulated by high-order optic flow patterns (e.g., spiral), yet a functional link to direct perception is lacking. Here, we applied electrical microstimulation to selectivel…		3	x	This paper describes the causal relationship between MSTd neurons and visual role perception. The experiments are well performed, the results are robust, and the paper addresses a very important question regarding the neural mechanisms of visual navigation. Specifically, while the neural mechanisms of linear navigation have been addressed previously, this study opens up a new area of rotational n…	This is a potentially significant and important study. A large amount of data has been gathered on two visual stimulus paradigms that are thought to be relevant for the functional operations contributed by area MSTd in the macaque monkey. The technique of microstimulation of small groups of neurons has been applied to provide a direct test of the functional contribution of neuronal signals in MST…	a) What are the noteworthy results? The manuscript by Li and colleagues shows that neural signals in visual cortical area MST are causally related to our perception of rotational optical flow patterns. This is an elegant, well designed study that has been carefully analysed. While there is a direct, predictable effect in the fine perceptual task judging rotational patterns, the data for the coars…	N/A		80	80	40	50	70	50			80	60	60	70	70	70			80	70	50	60	70	60
241	https://www.nature.com/articles/s41467-022-33139-6			2021-05-21	2022-09-02	469		x			A	34.6	Huiling Yu	F	Jian-Zhi Wang	M	Infralimbic medial prefrontal cortex signalling to calbindin 1 positive neurons in posterior basolateral amygdala suppresses anxiety- and depression-like behaviours	Generalization is a fundamental cognitive ability of organisms to deal with the uncertainty in real-world situations. Excessive fear generalization and impaired reward generalization are closely related to many psychiatric disorders. However, the neural circuit mechanism for reward generalization and its role in anxiety-like behaviours remain elusive. Here, we found a robust activation of calbind…		2	x	The authors reports several experiments undertaken in mice to identify the neural underpinnings of optimistic or pessimistic behaviour, by using several methods, including behaviour, chemogenetic, optogenetic anterograde and retrograde tracing, immunohistochemistry. It is focusing on the projection from the infralimbic cortex to the posterior part of the Basolateral amygdala. This topic is intere…	Yu and colleagues have used a series of behavioral, recording, and projection-specific manipulation studies to examine the role of IL->BLA calbindin cells in modulating behavioral responses related to reward and aversion. While the use of several advanced tools in combination is impressive, the overall rationale for the studies and interpretations presented are problematic for several reasons. Th…	In this manuscript, the authors investigate the role of the posterior basolateral amygdala Calbindin 1 expressing neurons (pBLACalb1), and the infralimbic (IL) - pBLACalb1 circuit in positive interpretation bias of an ambiguous cue in a go/go task that the group developed. The authors first use cFos staining to identify increased activity in IL and pBLACalb1 neurons following a short-latency nose…	N/A		50	80	-60	20	50	50			60	80	-70	20	30	60			55	80	-65	20	40	55
242	https://www.nature.com/articles/s41467-022-33010-8			2022-01-21	2022-08-29	220	x				U	57.2	Beverly Setzer	F	Laura D. Lewis	F	A temporal sequence of thalamic activity unfolds at transitions in behavioral arousal state	Awakening from sleep reflects a profound transformation in neural activity and behavior. The thalamus is a key controller of arousal state, but whether its diverse nuclei exhibit coordinated or distinct activity at transitions in behavioral arousal state is unknown. Using fast fMRI at ultra-high field (7 Tesla), we measured sub-second activity across thalamocortical networks and within nine thala…		3	x	This paper studied the brain-wide dynamics at behaviorally defined arousals. Concurrent fMRI and EEG signals were collected and analyzed at behavioral arousals defined as the button pressing after a period of inactivity in overnight experiments. It was found that the cortex and thalamus showed distinct dynamics at the behavioral arousals. The thalamus increased its activity seconds prior to the a…	The manuscript by Setzer et al addresses an interesting and important question about the temporal sequence of thalamic and cortical responses to arousal. The study makes good use of ultra-fast fMRI, with good analyses and controls (eg looking at the impact of hemodynamic response variability on the temporal sequence within the thalamus). The manuscript itself is generally clearly written, althoug…	In this manuscript, the authors explore the role of different thalamic regions BOLD activity around the onset of awakening – assessed by a behavioural response that correlates with EEG signatures of arousal (increased alpha). They use fast 3T then 7T fMRI with a sub-second temporal resolution to quantify differences in temporal activations across the cortex and thalamus. They found that the thala…	N/A		60	80	75	70	50	70			70	70	75	85	50	80			65	75	75	77.5	50	75
244	https://www.nature.com/articles/s41467-022-33022-4			2022-03-28	2022-08-25	150	x				U	86.7	Tulsi Patel		Hynek Wichterle	M	Transcriptional dynamics of murine motor neuron maturation in vivo and in vitro	Neurons born in the embryo can undergo a protracted period of maturation lasting well into postnatal life. How gene expression changes are regulated during maturation and whether they can be recapitulated in cultured neurons remains poorly understood. Here, we show that mouse motor neurons exhibit pervasive changes in gene expression and accessibility of associated regulatory regions from embryon…		1	x	This study addresses a fundamental question in the field: how do post-mitotic neurons mature over time in vivo and in vitro? Uncovering the molecular mechanisms underlying neuronal maturation has significant implications not only for the developmental neuroscience field, but also for in vitro disease modelling and drug screening efforts. First, Patel et al. generate – in vivo – an impressive temp…	The study by Patel et al. mapped the transcriptional profiles and chromatin accessibility of isolated motor nuclei in vivo and in vitro throughout development. They identified potential regulators of motor neuron maturation and used their well-characterized in vitro model to manipulate maturation. By comparing their bulk RNAseq data from motor neuron nuclei to previous sequencing data from cortic…	In this manuscript Patel, Wichterle and colleagues, map the transcriptional trajectory of mouse spinal motor neurons (MNs) in vivo through various stages during development and aging using RNA-Seq and ATAC¬-Seq. Intriguingly, they find that the expression pattern of MNs becomes fully mature by P21 and is relatively stable and maintained up to 2 years. They then compare their findings with tempora…	N/A		80	85	30	30	85	75			80	90	30	65	80	70			80	87.5	30	47.5	82.5	72.5
245	https://www.nature.com/articles/s41467-022-33134-x			2022-03-05	2022-09-02	181	x				U	47.9	Michael Pitonak	M	Jennifer N. Dulin	F	Effects of biological sex mismatch on neural progenitor cell transplantation for spinal cord injury in mice	Despite advancement of neural progenitor cell transplantation to spinal cord injury clinical trials, there remains a lack of understanding of how biological sex of transplanted cells influences outcomes after transplantation. To address this, we transplanted GFP-expressing sex-matched, sex-mismatched, or mixed donor cells into sites of spinal cord injury in adult male and female mice. Biological …		1	x	This study examines the role of donor sex on the fate of neural progenitor cell (NPC) grafts after spinal cord injury (SCI) and reports that male grafts to female hosts exhibit significantly increased infiltration of cytotoxic T cells and significantly reduced numbers of surviving graft-derived neurons compared with sex matched grafts-host. The experimental approaches are well designed, well cont…	The manuscript, “Effects of biological sex mismatch on neural progenitor cell transplantation for spinal cord injury in mice”, is an original research paper, which mainly used immunohistochemical methods to identify if sex influences on neural transplantation in SCI mice. This is a very important topic in transplantation study but has never addressed in SCI field. I feel very easy and comfortable…	The manuscript by Pitonak et al. describes their findings on the effects of sex mismatch on transplantation of neural progenitor cells (NPCs) following spinal cord injury (SCI). The group finds that female mice receiving male cells exhibit significantly reduced neuronal density, hypervascularization, perivascular hypercellularity, and increased numbers of cytotoxic CD8+ T-cells infiltrating the g…	N/A		80	80	90	80	10	95			80	90	80	90	5	75			80	85	85	85	7.5	85
247	https://www.nature.com/articles/s41467-022-33085-3			2021-07-16	2022-09-01	412	x				U	90.6	Alexandra E. Perlegos	F	Nancy M. Bonini	F	Mettl3-dependent m6A modification attenuates the brain stress response in Drosophila	N6-methyladenosine (m6A), the most prevalent internal modification on eukaryotic mRNA, plays an essential role in various stress responses. The brain is uniquely vulnerable to cellular stress, thus defining how m6A sculpts the brain’s susceptibility may provide insight to brain aging and disease-related stress. Here we investigate the impact of m6A mRNA methylation in the adult Drosophila brain w…		1	x	In this study Perlegos et al presents the role of m6A during the stress response in Drosophila. The authors showed that m6A level is specifically elevated in brain mRNA after heat shock and that, surprisingly, m6A has a negative influence on stress resistance. Indeed the survival rate was higher after HS when Mettl3 was depleted ubiquitously or only in neurons or glia. M6A is enriched in the 5’UT…	This manuscript by Perlegos et al reports a very interesting phenomenon that Mettl3-siRNA Drosophila have a better chance of survival after heat shock (HS) insult. The study shows that knocking down Mettl3 specifically in neurons or astrocytes both improve survival rates, thus clearly demonstrating that this phenomenon involves Mettl3 function in the nervous system. The authors then carried out t…	In this manuscript, the authors investigate how m6A contributes to the brain’s stress response in flies by using acute heat shock stress (HS). They find that m6A levels are elevated in the brain in flies and that they further increase in the adult brain after HS. Furthermore, they identify a subset of RNAs that are Mettl3 methyltransferase targets in the brain with 5’UTR m6A and show that a small…	N/A		50	70	80	80	-70	20			50	70	85	80	-60	40			50	70	82.5	80	-65	30
248	https://www.nature.com/articles/s41467-022-32246-8			2021-09-28	2022-07-22	297	x				U	57.2	Stephanie L. Grella	F	Steve Ramirez	M	Reactivating hippocampal-mediated memories during reconsolidation to disrupt fear	Memories are stored in the brain as cellular ensembles activated during learning and reactivated during retrieval. Using the Tet-tag system in mice, we label dorsal dentate gyrus neurons activated by positive, neutral or negative experiences with channelrhodopsin-2. Following fear-conditioning, these cells are artificially reactivated during fear memory recall. Optical stimulation of a competing …		2	x	This is a very interesting and well-crafted manuscript describing an elegant set of experiments. The main findings of the study are that the authors demonstrate that by artificially activating dorsal dentate gyrus (dDG) positive valence memory ensembles during the retrieval of a context Pavlovian fear memory test, that the context fear memory subsequently becomes modified and weakened. Additional…	This study can be thought of as an intriguing marriage of two different research topics and research strategies: so-called ‘engram’ research, and research focussing on the phenomenon of ‘reconsolidation’. Engram research generally involves inserting a memory into a mouse (sometimes referred to as ‘Inception’), whereas in a typical reconsolidation experiment, a memory is activated, rendering it la…	Grella et al., test the hypothesis that positively-valenced memories (exposure of a female conspecific, delivery of cocaine) formed in a novel environment can interfere with the reconsolidation of an aversive memory (e.g. a conditioned contextual fear memory). The authors approach this goal by combining the Tet-tag system, optogenetics, extensive behavioral testing, and immunohistochemistry in th…	N/A		80	80	60	80	20	50			80	70	50	60	60	80			80	75	55	70	40	65
251	https://www.nature.com/articles/s41467-022-32990-x			2022-01-27	2022-08-25	210	x				U		Phong T. Nguyen		Beth Levine	F	Structural basis for gating mechanism of the human sodium-potassium pump	P2-type ATPase sodium-potassium pumps (Na+/K+-ATPases) are ion-transporting enzymes that use ATP to transport Na+ and K+ on opposite sides of the lipid bilayer against their electrochemical gradients to maintain ion concentration gradients across the membranes in all animal cells. Despite the available molecular architecture of the Na+/K+-ATPases, a complete molecular mechanism by which the Na+ a…		1	x	In this manuscript, Nguyen and co-authors describe their structural and functional analyses of a human brain-specific isoform of the P2 Na+/K+-ATPase. They first discovered that the alhpa3-beta1- FXYD6 complex can be overexpressed in the HEK cells and then performed their studies on this enzyme complex. They first demonstrated that the enzyme is located to the cell surface and functions as a Na+/…	This manuscript provides five cryo-em structures of the human neuron-specific alpha-3 isoform of the Na+,K+-ATPase. The work is very significant because: 1) It provides the first atomically-resolved structures of the alpha-3 isoform of the enzyme; 2) It provides the first ever structures of the cytoplasmic open states E1 and E1ATP of any isoform of the Na+,K+-ATPase, and 3) It provides the first …	Nguyen et al report five cryo-EM structures of Na,K-ATPase alpha3-isoform in different intermediate states. In order to obtain inward- or outward-open states, the authors generate 4A mutant in which the cation-coordinating acidic side chains were mutated to alanine. The approach is unique, and this is the first report of an inward-open structure for the Na,K-ATPase. However, authors fall short in…	N/A		60	70	90	80	-60	25			50	70	80	80	-60	30			55	70	85	80	-60	27.5
252	https://www.nature.com/articles/s41467-022-33020-6			2021-10-13	2022-08-25	316			x		E		Irene Serra	F	Marta Navarrete	F	Ca2+-modulated photoactivatable imaging reveals neuron-astrocyte glutamatergic circuitries within the nucleus accumbens	Astrocytes are key elements of brain circuits that are involved in different aspects of the neuronal physiology relevant to brain functions. Although much effort is being made to understand how the biology of astrocytes affects brain circuits, astrocytic network heterogeneity and plasticity is still poorly defined. Here, we have combined structural and functional imaging of astrocyte activity rec…		2	x	The very interesting work by Serra et al. uses a novel methodology (adapting an existing tool) to evaluate astrocytic activation (GFAP-CAMPARI), and performs functional imaging of nucleus accumbens astrocytes in response to optostimulation of different glutamatergic afferents (mPFC, BLA and vHIP). They show input-specific astrocytic driven responses induced by optogenetic activation of different …	Investigation of pathway-specific activation of glutamatergic fibers to the nucleus accumbens (NAc) placed the distinct neuronal input and/or output features in the centre. Therefore, conjuring up the role for distinguishable astrocyte assemblies integrating pathway-specific glutamatergic transmission is certainly an important and sensible approach [Kardos et al., Molecular plasticity of the nucl…	In this manuscript, Serra and colleagues dissected the functional connectivity between distinct glutamatergic neuronal circuits and astrocyte networks in the nucleus accumbens (NAc). To study the neuron-astrocyte interaction in NAc, the authors ‘smartly’ combined optogenetic stimulation of neurons with the optical monitoring of astrocyte-network activity using genetically encoded Ca2+ activity in…	N/A		85	80	30	60	20	80			80	70	20	80	30	80			82.5	75	25	70	25	80
253	https://www.nature.com/articles/s41467-022-33059-5			2021-08-23	2022-08-31	373	x				U	69.6	Altar Sorkaç		Gilad Barnea	M	Circuit analysis reveals a neural pathway for light avoidance in Drosophila larvae	Understanding how neural circuits underlie behaviour is challenging even in the connectome era because it requires a combination of anatomical and functional analyses. This is exemplified in the circuit underlying the light avoidance behaviour displayed by Drosophila melanogaster larvae. While this behaviour is robust and the nervous system relatively simple, the circuit is only partially delinea…		2	x	Behavioral responses to sensory cues are manifold. A simple and often quite robust initial response is attraction or repulsion. Drosophila larvae are typically repulsed light, a behavior that may be assessed using simple or sophisticated assays. While the early pathways (photoreceptors and target neurons) have been identified and studied, only little is known regarding higher neural pathways. One…	The goal of this manuscript by Sorkac et al. is twofold: (1) to develop and present a new version of the transsynaptic tracer trans-Tango-MkII compatible with applications in the Drosophila larva; (2) to apply trans-Tango-MkII to map the neural circuit underlying light-avoidance behavior in the larva. While part of the larval visual circuit has been mapped through EM tracing and functional inspec…	N/A	N/A		80	70	-20	20					70	60	-30	60					75	65	-25	40
255	https://www.nature.com/articles/s41467-022-32840-w			2022-01-26	2022-08-18	204			x		E	70.4	Thomas Schreiner	M	Tobias Staudigl	M	The human thalamus orchestrates neocortical oscillations during NREM sleep	A hallmark of non-rapid eye movement sleep is the coordinated interplay of slow oscillations (SOs) and sleep spindles. Traditionally, a cortico-thalamo-cortical loop is suggested to coordinate these rhythms: neocortically-generated SOs trigger spindles in the thalamus that are projected back to neocortex. Here, we used intrathalamic recordings from human epilepsy patients to test this canonical i…		3	x	The authors analyzed the dynamics of slow oscillations (SO) and spindles during NonREM sleep which were concurrently recorded from the anterior (ANT) and mediodorsal thalamus (MD) using intracranial electrodes, and from frontal/frontotemporal and parietal scalp EEG electrodes. SOs identified in the ANT tended to precede SOs occurring in the EEG (over frontal cortex) whereas SOs identified in the …	This is a very well-written, and thus easy to follow, manuscript that describes the inter-relationship of human SO and sleep spindles in two thalamic regions and their temporal dynamics with cortical SO and SS. The authors need to be congratulated on having grabbed the uncommon chance of recording from thalamic regions in humans. Their results are solid, their analytic and statistical approaches …	Schreiner et al. present novel and highly interesting findings on the coordination of oscillatory activity during sleep based on intracranial EEG data recorded in the human thalamus, as well as surface EEG. They show that the anterior thalamus organizes cardinal sleep oscillations in humans which has implications not only for the field of sleep physiology but also for the fields of human cognitio…	N/A		80	70	80	70	85	95			80	50	80	80	80	100			80	60	80	75	82.5	97.5
256	https://www.nature.com/articles/s41467-022-32775-2			2021-09-29	2022-08-16	321			x		E	54.1	Jérémie Sibille	M	Jens Kremkow	M	High-density electrode recordings reveal strong and specific connections between retinal ganglion cells and midbrain neurons	The superior colliculus is a midbrain structure that plays important roles in visually guided behaviors in mammals. Neurons in the superior colliculus receive inputs from retinal ganglion cells but how these inputs are integrated in vivo is unknown. Here, we discovered that high-density electrodes simultaneously capture the activity of retinal axons and their postsynaptic target neurons in the su…		2	x	The manuscript of Sibille et al. makes creative use of Neuropixels probes to simultaneously record from a large population of retinal ganglion cells and neurons in the superior colliculus. Using a strategic angle of insertion of high-density, high channel count silicon probes they can simultaneously record from neurons in the superior colliculus and their retinal inputs. Using this large set of p…	The authors devise a novel approach to simultaneously record from retinal axons and postsynaptic neurons in the superior colliculus of mice and the optic tectum of zebra finches. They provide compelling evidence for the validity of their approach. The authors then use this novel technique to show that the retinotopy of retinal axonal projections in superior colliculus is preserved at a high level…	This is an interesting study investigating how the activity of retinal axons is paired with the activity of their target neurons in the superficial layers of the superior colliculus of mice and optic tectum in zebra finches. The results are based on extracellular recordings of single unit activities using pixel probes with many channels. Using thus a very modern electrophysiological approach seve…	N/A		5	60	70	80	50	70			10	75	80	80	60	80			7.5	67.5	75	80	55	75
257	https://www.nature.com/articles/s41467-022-32898-6			2022-01-19	2022-08-23	216			x		E	95	Zeinab Asgarian	F	Nicoletta Kessaris	F	MTG8 interacts with LHX6 to specify cortical interneuron subtype identity	Cortical interneurons originating in the embryonic medial ganglionic eminence (MGE) diverge into a range of different subtypes found in the adult mouse cerebral cortex. The mechanisms underlying this divergence and the timing when subtype identity is set up remain unclear. We identify the highly conserved transcriptional co-factor MTG8 as being pivotal in the development of a large subset of MGE …		1	x	This paper examines cerebral cortical interneuron fate determination, in particular fates of interneuron progenitors in the medial ganglionic eminence, in which Lhx6 has been established to influence both migration the fate of both parvalbumin and somatostatin subclasses, although mechanisms by which it differentially influences these fates is not known. The authors convincingly demonstrate that …	The manuscript by Asgarian et al, entitled “MTG8 interacts with LHX6 to specify cortical interneuron subtype identity” describes the role of the transcriptional co-factor MTG8 in the specification of a subset of MGE-derived SST-interneurons. The manuscript is an important contribution to the answer of how cortical interneuron identity and specification is established and offers further understand…	The manuscript by Asgarian et al., reveal a new molecular mechanisms in the development of cortical interneurons. The authors identify that MTG8 is a new marker and developmental regulator of the SSTNPY interneuron subtype generated from the MGE. The authors also show that MTG8 physically interacts with LHX6 one of the key regulators of early cortical interneuron development. This interaction is …	N/A		60	80	60	70	80	80			50	80	60	70	80	70			55	80	60	70	80	75
258	https://www.nature.com/articles/s41467-022-32608-2			2021-12-03	2022-08-08	248	x				U	45.6	Charles Warwick	M	Sarah E. Ross	F	Cell type-specific calcium imaging of central sensitization in mouse dorsal horn	Allodynia is a state in which pain is elicited by innocuous stimuli. Capsaicin applied to the skin results in an allodynia that extends to a broad region beyond the application site. This sensitization is thought to be mediated by spinal networks; however, we do not have a clear picture of which spinal neurons mediate this phenomenon. To address this gap, we used two-photon calcium imaging of exc…		2	x	Using an ex vivo prep Warwick et al. have performed an extensive chemogenic profile of spinal neurons in the dorsal horn that appears to mediate capsaicin-induced central sensitization. This work builds upon previous studies that have used this group's ex vivo skin/spinal cord preparation (Hachisuka et al. 2016 and Choi et al. 2020). The studies presented here by Warwick and colleagues are well p…	This paper mapped somatosensory receptive fields and modalities of spinoparabrachial (SPB) neurons and excitatory spinal interneurons in dorsal horn laminae I and 2 on a populational level by imaging Ca2+ activity using GCaMP6s and multiphoton microscopy both before and after capsaicin application to visualize central sensitization. This is a step towards understanding central sensitization with …	In this manuscript, Warwick and collaborators investigate the spinal dorsal horn network with calcium imaging to identify populations mediating capsaicin-induced central sensitization. To do so, they combine an ex vivo preparation that enables recording calcium activity at the cellular level with “natural” peripheral stimulation, with a pharmacological profiling strategy that enables a novel clas…	N/A		70	80	60	80	50	80			70	80	40	90	20	75			70	80	50	85	35	77.5
261	https://www.nature.com/articles/s41467-022-32886-w			2021-12-20	2022-08-18	241	x				U	62.3	Shivesh Chaudhary	M	Hang Lu	M	Fast, efficient, and accurate neuro-imaging denoising via supervised deep learning	Volumetric functional imaging is widely used for recording neuron activities in vivo, but there exist tradeoffs between the quality of the extracted calcium traces, imaging speed, and laser power. While deep-learning methods have recently been applied to denoise images, their applications to downstream analyses, such as recovering high-SNR calcium traces, have been limited. Further, these methods…		4	x	This manuscript describes a SNR improvement method for volumetric functional imaging based on an optimized convolutional neural network. The authors demonstrated the strong generalization ability of the network model on various applications, including whole-brain, motor neurons imaging in freelymoving animals. The major advantage of this work over the alternative approaches is the optimized CNN m…	The authors use supervised learning to train multiple convolutional neural networks (CNNs) for the denoising of fluorescence microscopy images. Training data (including ground truth) is collected by recording pairs of subsequent high-exposure and low-exposure images. The authors compare the results obtained by the different architectures and training modalities against each other and against basi…	This paper presents a supervised deep learning approach to denoise fluorescence microscopy images. In recent years a variety of deep neural networks for resolution enhancement have been proposed such as CARE [1], SRResNET [2], ESRGAN [3], and RCAN [4]. Specially CARE, which also uses 'ground-truth' data and a UNet architecture, seems to be very similar to this work. The main contribution of this …	N/A		40	70	50	90	10	90			20	60	60	80	0	80			30	65	55	85	5	85
264	https://www.nature.com/articles/s41467-022-32741-y			2020-06-18	2022-08-15	788			x		E	70	Sophie-Anne Baker	F	Nathan F. Lepora	M	Degenerate boundaries for multiple-alternative decisions	Integration-to-threshold models of two-choice perceptual decision making have guided our understanding of human and animal behavior and neural processing. Although such models seem to extend naturally to multiple-choice decision making, consensus on a normative framework has yet to emerge, and hence the implications of threshold characteristics for multiple choices have only been partially explor…		4	x	The manuscript investigates the question of how to best commit to choices in multiple-alternative decision making. It uses a Bayesian framework for normative evidence accumulation, in which case accumulation termination is controlled by boundaries on the Bayesian posterior. The authors ask for different families of boundary shapes which member of this family maximizes the expected reward. They fi…	This paper describes a surprising theoretic result relating to optimal choices between multiple options. Theory of decision making has established that the optimal decision procedures involve integrating sensory information until the evidence for one of the options reaches a specific threshold referred to as a decision boundary. Over the last 20 years, much research has focussed on identifying th…	N/A	N/A		-60	50	50	80					-30	60	80	90					-45	55	65	85
265	https://www.nature.com/articles/s41467-022-32304-1			2021-09-13	2022-07-25	315	x		x			55.8	Chiara Favaretto	F	Maurizio Corbetta	M	Subcortical-cortical dynamical states of the human brain and their breakdown in stroke	The mechanisms controlling dynamical patterns in spontaneous brain activity are poorly understood. Here, we provide evidence that cortical dynamics in the ultra-slow frequency range (<0.01–0.1 Hz) requires intact cortical-subcortical communication. Using functional magnetic resonance imaging (fMRI) at rest, we identify Dynamic Functional States (DFSs), transient but recurrent clusters of cortical…		5	x	This neuroimaging work aims to assess time-varying functional brain states at rest, focusing on the relationship between subcortical and cortical brain regions. The functional (including behavioural) importance of the detected brain states was assessed by leveraging multimodal clinical (stroke) samples. Overall, the results suggest a key role of subcortical-cortical interactions in the definition…	Favaretto et al. present dynamic functional connectivity analyses of longitudinal restingstate fMRI data of 47 ischemic and hemorrhagic stroke patients and 20 healthy controls. They present several complementary analyses: On the one hand, they examine the interplay of dynamic cortical and subcortical network switches independent of disease. On the other hand, they characterize dynamic functional …	N/A	N/A		70	90	75	70					40	70	60	80					55	80	67.5	75
266	https://www.nature.com/articles/s41467-022-32824-w			2021-10-11	2022-08-18	311	x				U	55.8	Zhikai Liu		Martha W. Bagnall	F	Organization of the gravity-sensing system in zebrafish	Motor circuits develop in sequence from those governing fast movements to those governing slow. Here we examine whether upstream sensory circuits are organized by similar principles. Using serial-section electron microscopy in larval zebrafish, we generated a complete map of the gravity-sensing (utricular) system spanning from the inner ear to the brainstem. We find that both sensory tuning and d…		2	x	Liu et al present a synaptic connectivity analysis of inner ear hair cells and utricular ganglion afferents of a larval zebrafish. They identify a spatial pattern and connectivity that correlates inferred hair cell development sequence with the onset of motor behaviors. Overall the study is well presented and the data support the conclusions of the authors. Major comments: 1. The reconstruction a…	This is a review of "The organization of the gravity-sensing system in zebrafish”. In this reviewer’s opinion, this manuscript was a pleasure to read and I recommend it for publication. In this study, Liu and colleagues used high-resolution serial selection electron microscopy to characterize the anatomical inputs and outputs of Zebrafish utricular afferents. The authors find two-dimensional topo…	In this manuscript, Zhikai Liu and colleagues report their work on the organisation of the utricle of the vestibular system in young zebrafish. They use a dataset of serial-section electron microscopy to trace neurons, and observe connectivity with hair cells and c central targets. The work is exhaustive and very well conducted. The quality of the data is exceptional and their results are sound a…	N/A		50	70	90	95	40	70			60	80	80	100	60	80			55	75	85	97.5	50	75
270	https://www.nature.com/articles/s41467-022-32558-9			2022-01-29	2022-08-03	186			x		E		Manfred J. Oswald	M	Rohini Kuner	F	Cholinergic basal forebrain nucleus of Meynert regulates chronic pain-like behavior via modulation of the prelimbic cortex	The basal nucleus of Meynert (NBM) subserves critically important functions in attention, arousal and cognition via its profound modulation of neocortical activity and is emerging as a key target in Alzheimer’s and Parkinson’s dementias. Despite the crucial role of neocortical domains in pain perception, however, the NBM has not been studied in models of chronic pain. Here, using in vivo tetrode …		2	x	The authors demonstrate that cholinergic projections from the basal nucleus of Meynert (NBM) to the prefrontal cortex play an important role in top-down control of pain processing in models of inflammatory and neuropathic pain. First, the authors show that GABAergic/Cholinergic NBM neurons are activated (express cFos) in response to inflammatory pain; accordingly, in-vivo electrophysiological rec…	Summary: Oswald et al. use a multifaceted approach including optogenetics, in-vivo electrophysiology, confocal imaging, and behavioral tasks to study the role of cholinergic-GABAergic neurons within the basal nucleus of Meynert (NBM) in pain regulation. The authors present new data indicating that these NBM neurons respond to noxious stimuli with activity being enhanced by inflammatory pain. Data…	N/A	N/A		80	80	60	80					80	90	50	75					80	85	55	77.5
271	https://www.nature.com/articles/s41467-022-32742-x			2021-10-19	2022-08-15	300		x			A	79.3	Fan Fei		Yi Wang	M	Discrete subicular circuits control generalization of hippocampal seizures	Epilepsy is considered a circuit-level dysfunction associated with imbalanced excitation-inhibition, it is therapeutically necessary to identify key brain regions and related circuits in epilepsy. The subiculum is an essential participant in epileptic seizures, but the circuit mechanism underlying its role remains largely elusive. Here we deconstruct the diversity of subicular circuits in a mouse…		2	x	The ms “Deconstructing the Diversity of Subicular Circuits in Seizure Generalization of Temporal Lobe Epilepsy” by Fan Fei and collaborators is an extension of their previous study on how the subiculum is a gatekeeper of temporal lobe seizures generalization. Although the role of subiculum in the initiation and propagation of hippocampal seizures has been shown before, the exact cellular mechanis…	The current study explores the role of principal cells from the subiculum in temporal lobe epilepsy (TLE). Using two different models of TLE (kindling and kainate) combined with optogenetics, chemogenetics, calcium imaging, tracing and electrophysiology, the authors show that the stimulation of pyramidal neurons projecting to the anterior nucleus of the thalamus (ANT) promote epileptic seizures w…	Fei et al. investigated the role of excitatory subicular neurons in the generation of epileptiform activities. By primarily using the kindling model of epilepsy in mice, the authors measured calcium signaling in the subiculum during seizures. They manipulated the excitability of the subiculum or its downstream terminals using optogenetics or chemogenetic tools targeted to excitatory neurons. The …	N/A		85	80	70	60	30	60			80	80	50	80	40	60			82.5	80	60	70	35	60
272	https://www.nature.com/articles/s41467-022-32685-3			2021-10-05	2022-08-10	309			x		E		Maria Alexandra Rujano	F	Pauline Spéder	F	An interplay between cellular growth and atypical fusion defines morphogenesis of a modular glial niche in Drosophila	Neural stem cells (NSCs) live in an intricate cellular microenvironment supporting their activity, the niche. Whilst shape and function are inseparable, the morphogenetic aspects of niche development are poorly understood. Here, we use the formation of a glial niche to investigate acquisition of architectural complexity. Cortex glia (CG) in Drosophila regulate neurogenesis and build a reticular s…		1	x	This manuscript by Rujano et al presents a fascinating analysis of Drosophila cortex glia development, and the role of sharing of cytoplasm between nuclear compartments. The novelty of the work is exceptional, and it presents fascinating new paradigms for neural stem cell niche architecture. That being said, I have numerous comments related to data presentation that speak to ensuring reader clari…	The work presented in this manuscript solves the question of how cortex glia, which forms a major part of the niche environment of Drosophila neural progenitors, grows during larval development. The authors enlist an astounding number of new techniques to attack the problem from different angles. As a result they make a very convincing case for their conclusions, which entail a number of novel an…	Stem cells are embedded in a cellular microenvironment called a niche. Niches provide structural support, nutrients and signaling cues, influencing the stem cells’ behavior and often fate. Fly neural stem cells, called neuroblasts have been found to be surrounded by cortex glia, providing nutritional cues during the neuroblast development. However, how the neuroblast niche and its complex archite…	N/A		80	70	70	80	80	80			70	80	80	60	70	90			75	75	75	70	75	85
273	https://www.nature.com/articles/s41467-022-32688-0			2022-01-16	2022-08-10	206			x		E	76.4	Karin Taş	F	Aphrodite Kapurniotu	F	Designed peptides as nanomolar cross-amyloid inhibitors acting via supramolecular nanofiber co-assembly	Amyloid self-assembly is linked to numerous devastating cell-degenerative diseases. However, designing inhibitors of this pathogenic process remains a major challenge. Cross-interactions between amyloid-β peptide (Aβ) and islet amyloid polypeptide (IAPP), key polypeptides of Alzheimer’s disease (AD) and type 2 diabetes (T2D), have been suggested to link AD with T2D pathogenesis. Here, we show tha…		1	x	In my opinion the work presented in the article of Kapurniotu et al. is superb both in terms of peptides design, inhibitory activities results, methodology and biophysical tools used. The objectives, the methodologies and techniques, the analyses of the results and the discussion are very well explained and written. Kapurniotu et al designed peptides derived from the Abeta40 amyloid core Abeta(15…	The manuscript with the title ¨Designed peptides as nanomolar cross-amyloid inhibitors acting via supramolecular nanofiber co-assembly¨ describes the generation of inhibitors for prevention of Aβ and IAPP self-aggregation and cross-seeding between the two peptides. Aβ amyloid is present in the brain of patients with Alzheimer's disease, while IAPP forms cytotoxic amyloid in the islets of Langerha…	This manuscript reports that constrained peptides designed to mimic the amyloid core of Aβ (ACMs) are nanomolar inhibitors of IAPP and Aβ42 self-assembly and suppress reciprocal cross-seeding. In this manuscript, the authors define the nature of ACMs co-assembled heteromeric nanofibers that exhibit various beneficial features including thermolability, proteolytic degradability and cellular cleara…	To learn more about the molecular architecture of the IAPP/ACM nanofibers the authors employ FLIMFRET, and use fluorescein as the donor fluorophore (Fluos-NIe3-Vf) and Atto647 as the acceptor fluorophore(TAMRA-IAPP, hf-TAMRA-IAPP, TAMRA-Aβ42). I have the following comments and questions regarding these FLIM-FRET experiments. Major Comments - In panel j of Fig. 3 where the fluorescence lifetime of…		90	80	80	70	80	80	0	70	80	80	70	80	100	100	0	70	85	80	75	75	90	90	0
276	https://www.nature.com/articles/s41467-022-32555-y			2020-10-11	2022-08-04	662	x				U	93.2	Andrew M. Clark	M	David C. Bradley	M	A neural correlate of perceptual segmentation in macaque middle temporal cortical area	High-resolution vision requires fine retinal sampling followed by integration to recover object properties. Importantly, accuracy is lost if local samples from different objects are intermixed. Thus, segmentation, grouping of image regions for separate processing, is crucial for perception. Previous work has used bi-stable plaid patterns, which can be perceived as either a single or multiple movi…		3	x	This paper reports the finding that neuronal responses in the middle-temporal (MT) cortex of macaque monkeys are correlated with the animals’ choices of perceptual coherence and transparency. Previous studies have found that neurons in area MT show choice-related activity when monkeys perform direction or disparity discrimination tasks, or a structure-from-motion task. Other studies have shown th…	This paper aims to show that Area MT in monkeys has a direct correlation with the perception of motion. Several authors have already demonstrated that MT appears to be involved in 'driving' the perception of motion. The specific issue investigated here is whether MT (and particularly one cell type in MT) is involved in the perception of motion segmentation judgements. The most important finding i…	This has been one of the easiest papers I have reviewed. The authors have done an excellent job addressing an open question about the role of area MT in discriminating between transparent versus coherent motion. Results show that MT responses signal transparent versus coherent motion, are correlated with behavior, and are stronger in pattern direction cells, the cells that were previously hypothe…	N/A		70	80	20	70	90	100			70	70	0	80	90	100			70	75	10	75	90	100
277	https://www.nature.com/articles/s41467-022-32679-1			2021-07-21	2022-08-10	385			x		E	40	Ruben van den Bosch	M	Roshan Cools	F	Striatal dopamine dissociates methylphenidate effects on value-based versus surprise-based reversal learning	Psychostimulants such as methylphenidate are widely used for their cognitive enhancing effects, but there is large variability in the direction and extent of these effects. We tested the hypothesis that methylphenidate enhances or impairs reward/punishment-based reversal learning depending on baseline striatal dopamine levels and corticostriatal gating of reward/punishment-related representations…		3	x	This human study tests the overall hypothesis that the effects of methylphenidate (MPH) on reversal learning performance depend on baseline levels of striatal dopamine and that these effects are driven by a gating mechanism, modulating neural responses to unexpected outcomes in stimulus-specific sensory cortex. The study combines dopamine pharmacology (catecholamine reuptake inhibitor MPH and D2/…	This manuscript by van den Bosch et al. describes a well-designed, well-powered, and pre-registered pharmacological neuroimaging study that investigates the influence of two dopaminergic drugs (methylphenidate and sulpiride) on reversal learning and BOLD activation to unexpected outcomes in participants who vary as a function of striatal dopamine synthesis capacity (measured with FDOPA PET; Ki). …	This paper aims to answer important questions about how dopamine modulates reward learning, and interindividual differences underlying this. The main advance are evidence for the striatal gating hypothesis and for striatal dopamine synthesis capacity influencing the brain mechanisms underlying reversal learning. The study is well designed using a double blind, randomised, placebo controlled (with…	N/A		80	60	70	60	60	80			80	90	90	80	80	70			80	75	80	70	70	75
278	https://www.nature.com/articles/s41467-022-32625-1			2021-03-01	2022-08-10	527	x				U		Ying Xue Xie	F	Manu Sharma	M	Lysosomal exocytosis releases pathogenic α-synuclein species from neurons in synucleinopathy models	Considerable evidence supports the release of pathogenic aggregates of the neuronal protein α-Synuclein (αSyn) into the extracellular space. While this release is proposed to instigate the neuron-to-neuron transmission and spread of αSyn pathology in synucleinopathies including Parkinson’s disease, the molecular-cellular mechanism(s) remain unclear. To study this, we generated a new mouse model t…		1	x	In the present study, Xie et al. suggest that lysosomal exocytosis is implicated in the cellular release of pathogenic alpha-synuclein (aSyn) species from neurons. Using transgenic mice expressing human A53T αSyn under the control of Thy-1 promoter, the authors show high molecular weight signal in aSyn immunoblots from endolysosomeenriched fractions of mouse brain or cortical primary neurons. Con…	The manuscript addresses the mechanism of a-synuclein secretion using in vivo and in vitro models, concluding that lysosomal exocytosis and VAMP7/ SNAP23 proteins are required for this process. The work addresses an important question in the field and uses relevant models to test their hypothesis. Most of the work is technically well done: they present clean data that shows successful isolation o…	This study does a nice job of documenting the lysosomal localization of pathogenic forms of aSyn, which was proposed previously by several groups. The original part of the study is the evidence indicating that SNARE-mediated lysosomal exocytosis is involved in the release of aSyn aggregates. However, lysosomal exocytosis has been extensively demonstrated in other cell types to be absolutely depen…	N/A		30	85	60	70	20	80			20	70	50	80	0	50			25	77.5	55	75	10	65
279	https://www.nature.com/articles/s41467-022-32619-z			2021-10-17	2022-08-09	296			x		E	58.7	Lasse Pihlstrøm	M	Mathias Toft	M	Epigenome-wide association study of human frontal cortex identifies differential methylation in Lewy body pathology	Parkinson’s disease (PD) and dementia with Lewy bodies (DLB) are closely related progressive disorders with no available disease-modifying therapy, neuropathologically characterized by intraneuronal aggregates of misfolded α-synuclein. To explore the role of DNA methylation changes in PD and DLB pathogenesis, we performed an epigenome-wide association study (EWAS) of 322 postmortem frontal cortex…		5	x	Pihlstrøm et al. generated DNA methylation (DNAm) data for a large cohort of 322 postmortem frontal cortex brain samples from iLB, PD, DLB and control subjects. They performed analysis on both discovery and replication datasets to nominate 4 significant CpGs. Given that few DNAm studies have been performed in large cohorts of PD samples so far, the study made a significant contribution to the fie…	In this manuscript, Pihlstrom and colleagues describe analysis of DNA methylation in Lewy body pathology using data from 541 post-mortem frontal cortex samples from the Netherlands Brain Bank (discovery) and Normal Aging Brain Collection, Amsterdam (replication). This is a large sample for a brain based EWAS and is a significant new dataset in relation to understanding epigenetic changes involved…	N/A	N/A		50	70	5	80					40	70	30	80					45	70	17.5	80
280	https://www.nature.com/articles/s41467-022-32644-y			2021-09-12	2022-08-08	330	x				U	25.3	Masahiro Sawada	M	Hiroyuki Oya	M	Mapping effective connectivity of human amygdala subdivisions with intracranial stimulation	The primate amygdala is a complex consisting of over a dozen nuclei that have been implicated in a host of cognitive functions, individual differences, and psychiatric illnesses. These functions are implemented through distinct connectivity profiles, which have been documented in animals but remain largely unknown in humans. Here we present results from 25 neurosurgical patients who had concurren…		3	x	This manuscript describes results from a concurrent electrical stimulation/intracranial electroencephalograpy and fMRI study examining amygdala effective connectivity in neurosurgical patients. The main findings are that stimulation of the lateral amygdala produced effects in anterior cingulate, sensorimotor cortex, superior temporal sulcus and superior parietal lobule, and stimulation of the med…	This study of the human amygdala used multiple imaging and analysis approaches to probe the effective connectivity of the amygdala, allowing conclusions about the direction of responses with spatial and temporal resolution that has previously been limited in human investigations. The authors find that the cingulate cortex and prefrontal cortex are central network nodes that respond to amygdala st…	Sawada et al. present a very valuable work on subdividing the human amgydala functionally by intracranial stimulation by means of electrophysiological as well as fMRI measures. The authors clearly demonstrate the activation of different networks stimulating medial vs. lateral amygdala which are however, consistent networks comparing esTT and esfMRI. Orbitofrontal and anterior cingulate cortex are…	N/A		60	80	30	70	80	50			50	80	50	70	90	80			55	80	40	70	85	65
281	https://www.nature.com/articles/s41467-022-32592-7			2021-09-22	2022-08-08	320			x		E		Lukas Frontzkowski	M	Nicolai Franzmeier	M	Earlier Alzheimer’s disease onset is associated with tau pathology in brain hub regions and facilitated tau spreading	In Alzheimer’s disease (AD), younger symptom onset is associated with accelerated disease progression and tau spreading, yet the mechanisms underlying faster disease manifestation are unknown. To address this, we combined resting-state fMRI and longitudinal tau-PET in two independent samples of controls and biomarker-confirmed AD patients (ADNI/BioFINDER, n = 240/57). Consistent across both sampl…		5	x	This is a very innovative and relevant study, extremely clear and well written, well conducted. I have some comments, two of which I consider as major (7 and 10). 1. The use of the term bias is ambiguous (e.g. in “a bias of tau-PET signal towards…”); it should not be used in the abstract, and it could be used in the article (core text) but after having been clearly defined (note that when saying …	This manuscript by Frontzkowski et al. retrospectively analyzes resting-state fMRI and longitudinal tau PET data from separate cohorts to analyze links between tau deposition and fMRI-derived functional networks in the brain. This is not the first study linking fMRI with longitudinal tau PET. In fact, another paper recently published in Nature Communications by Drs. Hansson and Franzmeier, author…	N/A	N/A		60	70	-60	30					70	90	-20	50					65	80	-40	40
282	https://www.nature.com/articles/s41467-022-32512-9			2021-05-24	2022-08-03	436			x		E		Mathilda Froesel	F	Suliann Ben Hamed	F	Socially meaningful visual context either enhances or inhibits vocalisation processing in the macaque brain	Social interactions rely on the interpretation of semantic and emotional information, often from multiple sensory modalities. Nonhuman primates send and receive auditory and visual communicative signals. However, the neural mechanisms underlying the association of visual and auditory information based on their common social meaning are unknown. Using heart rate estimates and functional neuroimagi…		3	x	Froesel and colleagues performed an fMRI study in two monkeys investigating audio-visual integration using socially meaningful stimuli. When monkeys are shown a combination of visual-auditory, and visual and auditory stimuli in isolation in different epochs, the meaning of the stimuli largely determines the fMRI responses in the superior temporal and lateral sulci. Specifically, when the auditory…	In their manuscript “Neural bases of audio-visual integration of socially meaningful information in macaques”, Froesel et al. use fMRI in macaque monkeys to assess the impact of audio-visual congruency versus incongruency in the social domain on brain activity and heart rate modulation. They report large changes of activity in the superior temporal sulcus (STS) and the lateral sulcus (LS) due to …	This is an interesting study on the representation of species-specific communication calls in the macaque using functional MRI. The authors use a battery of calls, recorded in the wild by one of the co-authors (Marc Hauser, a well-known neuroethologist with expertise in communication calls and behavior of macaques). Each type of calls is uttered in specific situations or contexts, which can be af…	N/A		90	80	-30	5	70	80			75	60	-50	30	75	50			82.5	70	-40	17.5	72.5	65
284	https://www.nature.com/articles/s41467-022-32207-1			2021-09-26	2022-07-20	297		x			A	85.3	Jelena Katic	F	Yoko Yazaki-Sugiyama	F	Neural circuit for social authentication in song learning	Social interactions are essential when learning to communicate. In human speech and bird song, infants must acquire accurate vocalization patterns and learn to associate them with live tutors and not mimetic sources. However, the neural mechanism of social reality during vocal learning remains unknown. Here, we characterize a neural circuit for social authentication in support of accurate song le…		2	x	The authors employ multi-unit recordings and optogenetics manipulations to describe how the locus coeruleus (LC) increases activity and selectivity in the neural circuit of song learning, particularly in the caudomedial nidopallium area (NCM), with direct behavioral consequences in the adult zebra finch. The authors found that LC increases its activity during social interaction with a tutor, whic…	In this study(<i>Katic et al, Neural Circuit for Social Authentication in Song Learning</i>), authors investigate the role of functional neural connections between Locus coeruleus (LC) and Caudomedial Nidopallium (NCM) in the social authentication of song-learning in juvenile Zebra finches. Building on previous knowledge in this field, authors take an important step forward to improve our underst…	In this manuscript, the authors use optogenetic methods show that projections for the Locus Coeruleus (LC) to the song nucleus NCM plays an important role in the social aspects of song learning. Neurons in NCM and LC respond more vigorously to song when presented by a live tutor vs. passive playback, and the response to passive tutor song showed a long-lasting increase after the tutoring sessions…	N/A		40	70	80	70	50	50			50	80	90	80	60	80			45	75	85	75	55	65
285	https://www.nature.com/articles/s41467-022-32556-x			2021-11-08	2022-08-03	268		x			A	37.3	Weiping Dai		Xiaojing Ye	F	A functional role of meningeal lymphatics in sex difference of stress susceptibility in mice	Major depressive disorder is one of the most common mental health conditions. Meningeal lymphatics are essential for drainage of molecules in the cerebrospinal fluid to the peripheral immune system. Their potential role in depression-like behaviour has not been investigated. Here, we show in mice, sub-chronic variable stress as a model of depression-like behaviour impairs meningeal lymphatics in …		2	x	In this study, Dai et al explored whether meningeal lymphatic dysfunction contributes to stress induced depression. Using a sub-chronic variable stress (SCVS) paradigm to induce depressive-like behaviors, they show here that SCVS leads to impaired meningeal lymphatic drainage and altered lymphatic vasculature morphology in female but not male mice and that this correlates with the female-biased i…	In this manuscript, the authors are describing a role of meningeal lymphatic vasculature in a model of sub-chronic variable stress that only leads to depressive-like behavior in females. Experimental data using this sex biased stress model in combination with gain and loss of function manipulations of meningeal lymphatic vasculature suggest that modulation of meningeal lymphatic drainage can be c…	Women are more likely to experience major depressive disorder (MDD) and severe symptoms, however, underlying biological mechanisms that could explain these sex differences are still unclear. In recent years, neuroimmune mechanisms of depression have received increasing attention. Nevertheless, the potential role of the meningeal lymphatic system, which is essential to drain excess macromolecules …	N/A		80	80	-50	30	80	70			80	80	-40	20	70	90			80	80	-45	25	75	80
5	https://www.nature.com/articles/s41467-023-36519-8			2021-11-05	2023-02-06	458		x			A		Hanseul Park		Jongpil Kim	M	Single-cell RNA-sequencing identifies disease-associated oligodendrocytes in male APP NL-G-F and 5XFAD mice	Alzheimer’s disease (AD) is associated with progressive neuronal degeneration as amyloid-beta (Aβ) and tau proteins accumulate in the brain. Glial cells were recently reported to play an important role in the development of AD. However, little is known about the role of oligodendrocytes in AD pathogenesis. Here, we describe a disease-associated subpopulation of oligodendrocytes that is present du…				N/A	N/A	N/A	N/A
9	https://www.nature.com/articles/s41467-023-36209-5			2022-04-10	2023-01-18	283		x			A		Shan Yao		Xiang-Dong Sun	M	This is a nice informative manuscript that reveals a novel role for the LDL receptor family member LRP4 in the development and maintenance of proprioceptive muscle spindles. The study has been methodically conducted, the data are strong and the conclusions solid. This paper will be of broad interest and contribute major new insights into the mechanisms of muscle innervation. My only criticism con…	Alterations in energy metabolism are associated with depression. However, the role of glycolysis in the pathogenesis of depression and the underlying molecular mechanisms remain unexplored. Through an unbiased proteomic screen coupled with biochemical verifications, we show that the levels of glycolysis and lactate dehydrogenase A (LDHA), a glycolytic enzyme that catalyzes L-lactate production, a…				N/A	N/A	N/A	N/A
11	https://www.nature.com/articles/s41467-023-36093-z			2022-01-23	2023-01-17	359		x			A		Chao Chen		Peifu Tang	M	Synchronized activity of sensory neurons initiates cortical synchrony in a model of neuropathic pain	Increased low frequency cortical oscillations are observed in people with neuropathic pain, but the cause of such elevated cortical oscillations and their impact on pain development remain unclear. By imaging neuronal activity in a spared nerve injury (SNI) mouse model of neuropathic pain, we show that neurons in dorsal root ganglia (DRG) and somatosensory cortex (S1) exhibit synchronized activit…				N/A	N/A	N/A	N/A
19	https://www.nature.com/articles/s41467-023-35805-9			2021-10-31	2023-01-03	429		x			A		Zhiwei Xu		Wen-Biao Gan	M	Generalized extinction of fear memory depends on co-allocation of synaptic plasticity in dendrites	Memories can be modified by new experience in a specific or generalized manner. Changes in synaptic connections are crucial for memory storage, but it remains unknown how synaptic changes associated with different memories are distributed within neuronal circuits and how such distributions affect specific or generalized modification by novel experience. Here we show that fear conditioning with tw…				N/A	N/A	N/A	N/A
21	https://www.nature.com/articles/s41467-023-35869-7			2022-05-09	2023-01-05	241		x			A		Pingfen Zhu		Xuming Zhou	M	Correlated evolution of social organization and lifespan in mammals	Discerning the relationship between sociality and longevity would permit a deeper understanding of how animal life history evolved. Here, we perform a phylogenetic comparative analysis of ~1000 mammalian species on three states of social organization (solitary, pair-living, and group-living) and longevity. We show that group-living species generally live longer than solitary species, and that the…				N/A	N/A	N/A	N/A
23	https://www.nature.com/articles/s41467-023-36008-y			2022-05-10	2023-01-12	247		x			A		Bin Li		Honghong Yao	F	FTO-dependent m6A modification of Plpp3 in circSCMH1-regulated vascular repair and functional recovery following stroke	Vascular repair is considered a key restorative measure to improve long-term outcomes after ischemic stroke. N6-methyladenosine (m6A), the most prevalent internal modification in eukaryotic mRNAs, functionally mediates vascular repair. However, whether circular RNA SCMH1 (circSCMH1) promotes vascular repair by m6A methylation after stroke remains to be elucidated. Here, we identify the role of ci…				N/A	N/A	N/A	N/A
24	https://www.nature.com/articles/s41467-023-36081-3			2022-07-17	2023-01-16	183	x				U		Daehun Park		Pietro De Camilli	M	Synaptic vesicle proteins and ATG9A self-organize in distinct vesicle phases within synapsin condensates	Ectopic expression in fibroblasts of synapsin 1 and synaptophysin is sufficient to generate condensates of vesicles highly reminiscent of synaptic vesicle (SV) clusters and with liquid-like properties. Here we show that unlike synaptophysin, other major integral SV membrane proteins fail to form condensates with synapsin, but co-assemble into the clusters formed by synaptophysin and synapsin in t…				N/A	N/A	N/A	N/A
27	https://www.nature.com/articles/s41467-023-36083-1			2022-11-15	2023-01-12	58	x				U		Shelei Pan		Jennifer M. Strahle	F	Gold nanoparticle-enhanced X-ray microtomography of the rodent reveals region-specific cerebrospinal fluid circulation in the brain	Cerebrospinal fluid (CSF) is essential for the development and function of the central nervous system (CNS). However, the brain and its interstitium have largely been thought of as a single entity through which CSF circulates, and it is not known whether specific cell populations within the CNS preferentially interact with the CSF. Here, we develop a technique for CSF tracking, gold nanoparticle-…				N/A	N/A	N/A	N/A
32	https://www.nature.com/articles/s41467-023-36014-0			2022-05-31	2023-01-12	226	x				U		Min Jung		Joshua S. Kaminker	M	Cross-species transcriptomic atlas of dorsal root ganglia reveals species-specific programs for sensory function	Sensory neurons of the dorsal root ganglion (DRG) are critical for maintaining tissue homeostasis by sensing and initiating responses to stimuli. While most preclinical studies of DRGs are conducted in rodents, much less is known about the mechanisms of sensory perception in primates. We generated a transcriptome atlas of mouse, guinea pig, cynomolgus monkey, and human DRGs by implementing a comm…				N/A	N/A	N/A	N/A
33	https://www.nature.com/articles/s41467-023-36054-6			2022-08-01	2023-01-12	164			x		E		Ana Domingo-Muelas	F	Isabel Fariñas	F	Post-transcriptional control of a stemness signature by RNA-binding protein MEX3A regulates murine adult neurogenesis	Neural stem cells (NSCs) in the adult murine subependymal zone balance their self-renewal capacity and glial identity with the potential to generate neurons during the lifetime. Adult NSCs exhibit lineage priming via pro-neurogenic fate determinants. However, the protein levels of the neural fate determinants are not sufficient to drive direct differentiation of adult NSCs, which raises the quest…				N/A	N/A	N/A	N/A
35	https://www.nature.com/articles/s41467-023-35834-4			2022-04-25	2023-01-03	253	x				U		Zhetuo Zhao		Michele Rucci	M	Inferring visual space from ultra-fine extra-retinal knowledge of gaze position	It has long been debated how humans resolve fine details and perceive a stable visual world despite the incessant fixational motion of their eyes. Current theories assume these processes to rely solely on the visual input to the retina, without contributions from motor and/or proprioceptive sources. Here we show that contrary to this widespread assumption, the visual system has access to high-res…				N/A	N/A	N/A	N/A
36	https://www.nature.com/articles/s41467-022-35752-x			2022-05-17	2022-12-23	220	x				U		Ayano Matsushima		Ann M. Graybiel	F	Transcriptional vulnerabilities of striatal neurons in human and rodent models of Huntington’s disease	Striatal projection neurons (SPNs), which progressively degenerate in human patients with Huntington’s disease (HD), are classified along two axes: the canonical direct-indirect pathway division and the striosome-matrix compartmentation. It is well established that the indirect-pathway SPNs are susceptible to neurodegeneration and transcriptomic disturbances, but less is known about how the strio…				N/A	N/A	N/A	N/A
39	https://www.nature.com/articles/s41467-023-35826-4			2022-03-10	2023-01-03	299	x				U		Anna J. Bowen	F	Richard D. Palmiter	M	Topographic representation of current and future threats in the mouse nociceptive amygdala	Adaptive behaviors arise from an integration of current sensory context and internal representations of past experiences. The central amygdala (CeA) is positioned as a key integrator of cognitive and affective signals, yet it remains unknown whether individual populations simultaneously carry current- and future-state representations. We find that a primary nociceptive population within the CeA o…				N/A	N/A	N/A	N/A
40	https://www.nature.com/articles/s41467-023-35806-8			2022-01-01	2023-01-03	367			x		E		Shun Li		Francesco Roselli	M	Interleukin-13 and its receptor are synaptic proteins involved in plasticity and neuroprotection	Immune system molecules are expressed by neurons, yet their functions are often unknown. We have identified IL-13 and its receptor IL-13Ra1 as neuronal, synaptic proteins in mouse, rat, and human brains, whose engagement upregulates the phosphorylation of NMDAR and AMPAR subunits and, in turn, increases synaptic activity and CREB-mediated transcription. We demonstrate that increased IL-13 is a ha…				N/A	N/A	N/A	N/A
49	https://www.nature.com/articles/s41467-022-35749-6			2021-12-22	2022-12-22	365	x				U		Jamal B. Williams	M	Zhen Yan	M	Inhibition of histone methyltransferase Smyd3 rescues NMDAR and cognitive deficits in a tauopathy mouse model	Pleiotropic mechanisms have been implicated in Alzheimer’s disease (AD), including transcriptional dysregulation, protein misprocessing and synaptic dysfunction, but how they are mechanistically linked to induce cognitive deficits in AD is unclear. Here we find that the histone methyltransferase Smyd3, which catalyzes histone H3 lysine 4 trimethylation (H3K4me3) to activate gene transcription, is…				N/A	N/A	N/A	N/A
52	https://www.nature.com/articles/s41467-022-35764-7			2022-03-16	2022-12-27	286	x				U		Zirui Huang		Anthony G. Hudetz	M	Functional geometry of the cortex encodes dimensions of consciousness	Consciousness is a multidimensional phenomenon, but key dimensions such as awareness and wakefulness have been described conceptually rather than neurobiologically. We hypothesize that dimensions of consciousness are encoded in multiple neurofunctional dimensions of the brain. We analyze cortical gradients, which are continua of the brain’s overarching functional geometry, to characterize these n…				N/A	N/A	N/A	N/A
55	https://www.nature.com/articles/s41467-022-35754-9			2022-06-28	2022-12-23	178		x			A		Lifeng Tian		Ren Lai	M	Vertebrate OTOP1 is also an alkali-activated channel	Although alkaline sensation is critical for survival, alkali-activated receptors are yet to be identified in vertebrates. Here, we showed that the OTOP1 channel can be directly activated by extracellular alkali. Notably, OTOP1 biphasically mediated proton influx and efflux with extracellular acid and base stimulation, respectively. Mutations of K221 and R554 at the S5–S6 and S11–S12 linkers signi…				N/A	N/A	N/A	N/A
56	https://www.nature.com/articles/s41467-022-35634-2			2022-06-28	2022-12-14	169		x			A		Takashi Nagashima	M	Ayako M. Watabe	F	Parabrachial-to-parasubthalamic nucleus pathway mediates fear-induced suppression of feeding in male mice	Feeding behavior is adaptively regulated by external and internal environment, such that feeding is suppressed when animals experience pain, sickness, or fear. While the lateral parabrachial nucleus (lPB) plays key roles in nociception and stress, neuronal pathways involved in feeding suppression induced by fear are not fully explored. Here, we investigate the parasubthalamic nucleus (PSTN), loca…				N/A	N/A	N/A	N/A
57	https://www.nature.com/articles/s41467-022-35659-7			2022-10-19	2022-12-14	56	x				U		Ari S. Benjamin	M	Konrad P. Kording	M	Efficient neural codes naturally emerge through gradient descent learning	Human sensory systems are more sensitive to common features in the environment than uncommon features. For example, small deviations from the more frequently encountered horizontal orientations can be more easily detected than small deviations from the less frequent diagonal ones. Here we find that artificial neural networks trained to recognize objects also have patterns of sensitivity that matc…				N/A	N/A	N/A	N/A
68	https://www.nature.com/articles/s41467-022-35388-x			2021-06-26	2022-11-30	522	x				U		Ryan G. Lim	M	Leslie M. Thompson	F	Huntington disease oligodendrocyte maturation deficits revealed by single-nucleus RNAseq are rescued by thiamine-biotin supplementation	The complexity of affected brain regions and cell types is a challenge for Huntington’s disease (HD) treatment. Here we use single nucleus RNA sequencing to investigate molecular pathology in the cortex and striatum from R6/2 mice and human HD post-mortem tissue. We identify cell type-specific and -agnostic signatures suggesting oligodendrocytes (OLs) and oligodendrocyte precursors (OPCs) are arr…				N/A	N/A	N/A	N/A
70	https://www.nature.com/articles/s41467-022-35498-6			2021-10-15	2022-12-07	418	x				U		Wenlu Li	M	Eng H. Lo	M	Endothelial cells regulate astrocyte to neural progenitor cell trans-differentiation in a mouse model of stroke	The concept of the neurovascular unit emphasizes the importance of cell-cell signaling between neural, glial, and vascular compartments. In neurogenesis, for example, brain endothelial cells play a key role by supplying trophic support to neural progenitors. Here, we describe a surprising phenomenon where brain endothelial cells may release trans-differentiation signals that convert astrocytes in…				N/A	N/A	N/A	N/A
72	https://www.nature.com/articles/s41467-022-35527-4			2022-01-02	2022-12-07	339			x		E		Yunpo Zhao		Mattias Alenius	M	Hedgehog-mediated gut-taste neuron axis controls sweet perception in Drosophila	Dietary composition affects food preference in animals. High sugar intake suppresses sweet sensation from insects to humans, but the molecular basis of this suppression is largely unknown. Here, we reveal that sugar intake in Drosophila induces the gut to express and secrete Hedgehog (Hh) into the circulation. We show that the midgut secreted Hh localize to taste sensilla and suppresses sweet sen…				N/A	N/A	N/A	N/A
76	https://www.nature.com/articles/s41467-022-35367-2			2022-10-03	2022-11-29	57	x				U		Min Ma		Jun Qu	M	In-depth mapping of protein localizations in whole tissue by micro-scaffold assisted spatial proteomics (MASP)	Accurate, in-depth mapping of proteins on whole-tissue levels provides comprehensive insights into the spatially-organized regulatory processes/networks in tissues, but is challenging. Here we describe a micro-scaffold assisted spatial proteomics (MASP) strategy, based on spatially-resolved micro-compartmentalization of tissue using a 3D-printed micro-scaffold, capable of mapping thousands of pro…				N/A	N/A	N/A	N/A
77	https://www.nature.com/articles/s41467-022-35518-5			2021-07-12	2022-12-08	514	x				U		Luke F. Nunnelly	M	Edmund Au	M	St18 specifies globus pallidus projection neuron identity in MGE lineage	The medial ganglionic eminence (MGE) produces both locally-projecting interneurons, which migrate long distances to structures such as the cortex as well as projection neurons that occupy subcortical nuclei. Little is known about what regulates the migratory behavior and axonal projections of these two broad classes of neurons. We find that St18 regulates the migration and morphology of MGE neuro…				N/A	N/A	N/A	N/A
78	https://www.nature.com/articles/s41467-022-35314-1			2022-02-04	2022-11-24	293	x				U		Eric Lowet	M	Xue Han	F	Deep brain stimulation creates informational lesion through membrane depolarization in mouse hippocampus	Deep brain stimulation (DBS) is a promising neuromodulation therapy, but the neurophysiological mechanisms of DBS remain unclear. In awake mice, we performed high-speed membrane voltage fluorescence imaging of individual hippocampal CA1 neurons during DBS delivered at 40 Hz or 140 Hz, free of electrical interference. DBS powerfully depolarized somatic membrane potentials without suppressing spike…				N/A	N/A	N/A	N/A
82	https://www.nature.com/articles/s41467-022-34975-2			2022-08-16	2022-11-10	86	x				U		Susana I. Ramos	F	Nadejda M. Tsankova	F	An atlas of late prenatal human neurodevelopment resolved by single-nucleus transcriptomics	Late prenatal development of the human neocortex encompasses a critical period of gliogenesis and cortical expansion. However, systematic single-cell analyses to resolve cellular diversity and gliogenic lineages of the third trimester are lacking. Here, we present a comprehensive single-nucleus RNA sequencing atlas of over 200,000 nuclei derived from the proliferative germinal matrix and laminati…				N/A	N/A	N/A	N/A
85	https://www.nature.com/articles/s41467-022-35266-6			2022-03-27	2022-11-24	242				x	O		Laura A. B. Wilson	F	Shinichi Nakagawa	M	Sex differences in allometry for phenotypic traits in mice indicate that females are not scaled males	Sex differences in the lifetime risk and expression of disease are well-known. Preclinical research targeted at improving treatment, increasing health span, and reducing the financial burden of health care, has mostly been conducted on male animals and cells. The extent to which sex differences in phenotypic traits are explained by sex differences in body weight remains unclear. We quantify sex d…				N/A	N/A	N/A	N/A
92	https://www.nature.com/articles/s41467-022-35214-4			2022-10-21	2022-11-21	31			x		E		Marina Kaiser	F	Mark-Oliver Trowe	M	TBX2 specifies and maintains inner hair and supporting cell fate in the Organ of Corti	The auditory function of the mammalian cochlea relies on two types of mechanosensory hair cells and various non-sensory supporting cells. Recent studies identified the transcription factors INSM1 and IKZF2 as regulators of outer hair cell (OHC) fate. However, the transcriptional regulation of the differentiation of inner hair cells (IHCs) and their associated inner supporting cells (ISCs) has rem…				N/A	N/A	N/A	N/A
93	https://www.nature.com/articles/s41467-022-35341-y			2021-07-23	2022-11-30	495			x		E		Erica Butti	F	Gianvito Martino	M	Neural precursor cells tune striatal connectivity through the release of IGFBPL1	The adult brain retains over life endogenous neural stem/precursor cells (eNPCs) within the subventricular zone (SVZ). Whether or not these cells exert physiological functions is still unclear. In the present work, we provide evidence that SVZ-eNPCs tune structural, electrophysiological, and behavioural aspects of striatal function via secretion of insulin-like growth factor binding protein-like …				N/A	N/A	N/A	N/A
96	https://www.nature.com/articles/s41467-022-35068-w			2022-03-06	2022-11-17	256	x				U		Blake J. Laham	M	Elizabeth Gould	F	The estrous cycle modulates early-life adversity effects on mouse avoidance behavior through progesterone signaling	Early-life adversity (ELA) increases the likelihood of neuropsychiatric diagnoses, which are more prevalent in women than men. Since changes in reproductive hormone levels can also increase the probability of anxiety disorders in women, we examined the effects of ELA on adult female mice across the estrous cycle. We found that during diestrus, when progesterone levels are relatively high, ELA mic…				N/A	N/A	N/A	N/A
97	https://www.nature.com/articles/s41467-022-35258-6			2021-11-21	2022-11-24	368	x				U		Dan Chen		Yunlei Yang	M	Deconstruction of a hypothalamic astrocyte-white adipocyte sympathetic axis that regulates lipolysis in mice	The role of non-neuronal glial cells in the regulation of adipose sympathetic nerve activity and adipocyte functions such as white adipose tissue lipid lipolysis is poorly understood. Here, we combine chemo/optogenetic manipulations of medio-basal hypothalamic astrocytes, real-time fiber photometry monitoring of white adipose tissue norepinephrine (NE) contents and nerve activities, electrophysio…				N/A	N/A	N/A	N/A
102	https://www.nature.com/articles/s41467-022-35160-1			2022-05-26	2022-11-21	179		x			A		Tianyu Wang		Lin Chen	F	Reconfigurable neuromorphic memristor network for ultralow-power smart textile electronics	Neuromorphic computing memristors are attractive to construct low-power- consumption electronic textiles due to the intrinsic interwoven architecture and promising applications in wearable electronics. Developing reconfigurable fiber-based memristors is an efficient method to realize electronic textiles that capable of neuromorphic computing function. However, the previously reported artificial s…				N/A	N/A	N/A	N/A
103	https://www.nature.com/articles/s41467-022-35115-6			2021-02-08	2022-11-17	647			x		E		Svenja Melbaum	F	Ilka Diester	F	Conserved structures of neural activity in sensorimotor cortex of freely moving rats allow cross-subject decoding	Our knowledge about neuronal activity in the sensorimotor cortex relies primarily on stereotyped movements that are strictly controlled in experimental settings. It remains unclear how results can be carried over to less constrained behavior like that of freely moving subjects. Toward this goal, we developed a self-paced behavioral paradigm that encouraged rats to engage in different movement typ…				N/A	N/A	N/A	N/A
104	https://www.nature.com/articles/s41467-022-35243-z			2022-05-22	2022-11-23	185			x	x			H. James McQuillan	M	Allan E. Herbison	M	Definition of the estrogen negative feedback pathway controlling the GnRH pulse generator in female mice	The mechanisms underlying the homeostatic estrogen negative feedback pathway central to mammalian fertility have remained unresolved. Direct measurement of gonadotropin-releasing hormone (GnRH) pulse generator activity in freely behaving mice with GCaMP photometry demonstrated striking estradiol-dependent plasticity in the frequency, duration, amplitude, and profile of pulse generator synchroniza…				N/A	N/A	N/A	N/A
109	https://www.nature.com/articles/s41467-022-35117-4			2022-03-08	2022-11-17	254	x				U		Sharif I. Kronemer	M	Hal Blumenfeld	M	Human visual consciousness involves large scale cortical and subcortical networks independent of task report and eye movement activity	The full neural circuits of conscious perception remain unknown. Using a visual perception task, we directly recorded a subcortical thalamic awareness potential (TAP). We also developed a unique paradigm to classify perceived versus not perceived stimuli using eye measurements to remove confounding signals related to reporting on conscious experiences. Using fMRI, we discovered three major brain …				N/A	N/A	N/A	N/A
112	https://www.nature.com/articles/s41467-022-34538-5			2022-10-10	2022-10-27	17			x		E		Christine Rother	F	Mathias Jucker	M	Experimental evidence for temporal uncoupling of brain Aβ deposition and neurodegenerative sequelae	Brain Aβ deposition is a key early event in the pathogenesis of Alzheimer´s disease (AD), but the long presymptomatic phase and poor correlation between Aβ deposition and clinical symptoms remain puzzling. To elucidate the dependency of downstream pathologies on Aβ, we analyzed the trajectories of cerebral Aβ accumulation, Aβ seeding activity, and neurofilament light chain (NfL) in the CSF (a bio…				N/A	N/A	N/A	N/A
120	https://www.nature.com/articles/s41467-022-34334-1			2021-10-26	2022-10-21	360	x				U		Arpiar Saunders	M	Steven A. McCarroll	M	Ascertaining cells’ synaptic connections and RNA expression simultaneously with barcoded rabies virus libraries	Brain function depends on synaptic connections between specific neuron types, yet systematic descriptions of synaptic networks and their molecular properties are not readily available. Here, we introduce SBARRO (Synaptic Barcode Analysis by Retrograde Rabies ReadOut), a method that uses single-cell RNA sequencing to reveal directional, monosynaptic relationships based on the paths of a barcoded r…				N/A	N/A	N/A	N/A
123	https://www.nature.com/articles/s41467-022-34457-5			2022-03-04	2022-10-25	235			x		E		Maximilian E. Kirschhock	M	Andreas Nieder	M	Number selective sensorimotor neurons in the crow translate perceived numerosity into number of actions	Translating a perceived number into a matching number of self-generated actions is a hallmark of numerical reasoning in humans and animals alike. To explore this sensorimotor transformation, we trained crows to judge numerical values in displays and to flexibly plan and perform a matching number of pecks. We report number selective sensorimotor neurons in the crow telencephalon that signaled the …				N/A	N/A	N/A	N/A
124	https://www.nature.com/articles/s41467-022-34590-1			2022-03-29	2022-10-31	216		x			A		Jia-Ru Wei		Sheng Liu		Identification of visual cortex cell types and species differences using single-cell RNA sequencing	The primate neocortex exerts high cognitive ability and strong information processing capacity. Here, we establish a single-cell RNA sequencing dataset of 133,454 macaque visual cortical cells. It covers major cortical cell classes including 25 excitatory neuron types, 37 inhibitory neuron types and all glial cell types. We identified layer-specific markers including HPCAL1 and NXPH4, and also id…				N/A	N/A	N/A	N/A
125	https://www.nature.com/articles/s41467-022-34513-0			2022-07-06	2022-10-25	111			x		E		Camille Mazo	F	Gabriel Lepousez	M	Long-range GABAergic projections contribute to cortical feedback control of sensory processing	In the olfactory system, the olfactory cortex sends glutamatergic projections back to the first stage of olfactory processing, the olfactory bulb (OB). Such corticofugal excitatory circuits — a canonical circuit motif described in all sensory systems— dynamically adjust early sensory processing. Here, we uncover a corticofugal inhibitory feedback to OB, originating from a subpopulation of GABAerg…				N/A	N/A	N/A	N/A
128	https://www.nature.com/articles/s41467-022-34452-w			2022-03-16	2022-10-25	223	x				U		Matthew S. Willsey	M	Cynthia A. Chestek	F	Real-time brain-machine interface in non-human primates achieves high-velocity prosthetic finger movements using a shallow feedforward neural network decoder	Despite the rapid progress and interest in brain-machine interfaces that restore motor function, the performance of prosthetic fingers and limbs has yet to mimic native function. The algorithm that converts brain signals to a control signal for the prosthetic device is one of the limitations in achieving rapid and realistic finger movements. To achieve more realistic finger movements, we develope…				N/A	N/A	N/A	N/A
[truncated: 44 more rows]
[truncated: 2 more columns]
